# Supplementary material for: Integrative analysis of scRNA-seq and scATAC-seq revealed transit-amplifying thymic epithelial cells expressing autoimmune regulator
Source: eLife. 2022 May 17;11:e73998. doi: 10.7554/eLife.73998 (PMC9113748; doi:10.7554/eLife.73998)
Supplement: Figure 6—source data 1. [file elife-73998-fig6-data1.xlsx]

## Sheet: Ratio Figure 6B
		%BrdU+ in mCherrylo
		0	3	6
	1	37.3	1.83	4.76
	2	42.9	4.65	1
	3	14.3	4.68	1.77
	4	46.1
	5	28.1
	6	32.9
	7	32.3
	AVERAGE	33.4143	3.72	2.51
	t.test	0.00151281	0.461184	0.00119778
		%BrdU+ in mCherryhi
		0	3	6
	1	3.26	10.3	10.9
	2	3.93	13.6	10.7
	3	1.7	6.16	7.97
	4	2.42
	5	11.3
	6	2.97
	7	1.87
	AVERAGE	3.92143	10.02	9.85667
	t.test	0.0333911	0.947939	0.0212738

## Sheet: Cell number Figure 6C
	Cell number					Cell number/mouse					mTEC hi cell number					mCherry lo cell number					mClo BrdU+cell number
		0	3	6			0	3	6			0	3	6			0	3	6			0	3	6
	1	316000000	306000000	160800000		1	158000000	153000000	80400000		1	262551	265565	126519		1	25730	23635.3	12904.9		1	9597.29	432.526	614.273
	2	336000000	326000000	344000000		2	168000000	163000000	172000000		2	285026	234219	232100		2	18241.7	16629.6	12997.6		2	7825.67	773.275	129.976
	3	426000000	250000000	314000000		3	213000000	125000000	157000000		3	351691	187378	221440		3	26376.8	12741.7	9521.91		3	3771.89	596.311	168.538
	4	93200000				4	93200000				4	142412				4	19083.2				4	8797.35
	5	69700000				5	69700000				5	106546				5	11506.9				5	3233.45
	6	238000000				6	119000000				6	207707				6	15162.6				6	4988.5
	7	304000000				7	152000000				7	319142				7	23616.5				7	7628.12
	AVERAGE	254700000	294000000	2.72933e+08		AVERAGE	1.38986e+08	147000000	1.36467e+08		AVERAGE	239296	229054	193353		AVERAGE	19959.7	17668.9	11808.1		AVERAGE	6548.9	600.704	304.262
																						0.0043114	0.182323	0.00330303
																mCherry hi cell numbrer					mChi BrdU+ cell number
																	0	3	6			0	3	6
																1	177222	178991	88816.1		1	5777.44	18436.1	9680.96
																2	217475	182925	191018		2	8546.76	24877.8	20438.9
																3	270451	146529	182688		3	4597.66	9026.21	14560.2
																4	92140.5				4	2229.8
																5	78737.3				5	8897.32
																6	164296				6	4879.6
																7	247016				7	4619.19
																AVERAGE	178191	169482	154174		AVERAGE	5649.68	17446.7	14893.4
																						0.00511521	0.669636	0.00416535
																						Day0 mCherrylo	Day3 mCherryhi	Day6 mCherryhi
																					1	9597.29	18436.1	9680.96
																					2	7825.67	24877.8	20438.9
																					3	3771.89	9026.21	14560.2
																					4	8797.35
																					5	3233.45
																					6	4988.5
																					7	7628.12
																					AVERAGE	6548.9	17446.7	14893.4
																						2.66407
																						1.6322
	Mouse number					Alive cell					mTEC hi(FACS)					mCherry lo%					%Brdu+ mClo					%Brdu+ mClo in mTEC hi
		0	3	6			0	3	6			0	3	6			0	3	6			0	3	6			0	3	6
	1	2	2	2		1	337001	337036	353962		1	560	585	557		1	9.8	8.9	10.2		1	37.3	1.83	4.76		1	3.6554	0.16287	0.48552
	2	2	2	2		2	295889	372322	356450		2	502	535	481		2	6.4	7.1	5.6		2	42.9	4.65	1		2	2.7456	0.33015	0.056
	3	2	2	2		3	248920	342223	360879		3	411	513	509		3	7.5	6.8	4.3		3	14.3	4.68	1.77		3	1.0725	0.31824	0.07611
	4	1				4	151830				4	232				4	13.4				4	46.1				4	6.1774
	5	1				5	98781				5	151				5	10.8				5	28.1				5	3.0348
	6	2				6	670892				6	1171				6	7.3				6	32.9				6	2.4017
	7	2				7	315772				7	663				7	7.4				7	32.3				7	2.3902
																AVERAGE	8.94286	7.6	6.7		AVERAGE	33.4143	3.72	2.51		AVERAGE	3.06823	0.27042	0.205877
																mCherry hi%					%Brdu+ mChi					%Brdu+ mChi in mTEC hi
																	0	3	6			0	3	6			0	3	6
																1	67.5	67.4	70.2		1	3.26	10.3	10.9		1	2.2005	6.9422	7.6518
																2	76.3	78.1	82.3		2	3.93	13.6	10.7		2	2.99859	10.6216	8.8061
																3	76.9	78.2	82.5		3	1.7	6.16	7.97		3	1.3073	4.81712	6.57525
																4	64.7				4	2.42				4	1.56574
																5	73.9				5	11.3				5	8.3507
																6	79.1				6	2.97				6	2.34927
																7	77.4				7	1.87				7	1.44738
																AVERAGE	73.6857	74.5667	78.3333		AVERAGE	3.92143	10.02	9.85667		AVERAGE	2.8885	7.46031	7.67772
																											Day0 mCherrylo	Day3 mCherryhi	Day6 mCherryhi
																					1					1	3.6554	6.9422	7.6518
																					2					2	2.7456	10.6216	8.8061
																					3					3	1.0725	4.81712	6.57525
																					4					4	6.1774
																					5					5	3.0348
																					6					6	2.4017
																					7					7	2.3902
																					AVERAGE					AVERAGE	3.06823	7.46031	7.67772

## Sheet: MFI Figure 6D
							Median
							mTEChi mCherrylo
							0	3	6
						1	8259	4231	3689
						2	12666	4324	3886
						3	6447	3025	3426
						4	11250
						5	7338
						6	5588
						7	7543
						AVERAGE	9192	3860	3667
							mTEChi mCherryhi
							0	3	6
						1	3354	3242	2657
						2	4613	3963	2096
						3	4201	3870	3522
						4	9033
						5	5339
						6	3848
						7	3957
						AVERAGE	5308	3691.67	2758.33
							Day0 mCherrylo	Day3 mCherryhi	Day6 mCherryhi
						1	8259	3242	2657
						2	12666	3963	2096
						3	6447	3870	3522
						4	11250
						5	7338
						6	5588
						7	7543
						AVERAGE	8441.57	3691.67	2758.33
						t.test	0.0153516	0.119464	0.00658509
