# Supplementary material for: Integrative analysis of scRNA-seq and scATAC-seq revealed transit-amplifying thymic epithelial cells expressing autoimmune regulator
Source: eLife. 2022 May 17;11:e73998. doi: 10.7554/eLife.73998 (PMC9113748; doi:10.7554/eLife.73998)
Supplement: Supplementary file 1. [file elife-73998-supp1.xlsx]

## Sheet: Sheet1
Supplementary File 1. List of genes specifically expressed in each cluster.
gene	cluster	p_val_adj	avg_log2FC
S100a8	R0	0	3.47215
Csn2	R0	0	2.51893
Calcb	R0	0	1.97103
Gm36899	R0	0	1.90097
Gm14275	R0	0	1.58009
Aire	R0	0	1.55421
Srgn	R0	0	1.47366
Ubd	R0	0	1.32528
Mcpt1	R0	0	0.250868
Cd52	R0	5.15083e-301	0.992485
Ctsh	R0	2.19924e-286	1.38894
Reg4	R0	1.66622e-270	0.833803
Gzmf	R0	1.1065e-257	0.281915
Nsmce1	R0	3.2435e-241	1.62004
1700029F12Rik	R0	1.09872e-240	0.649885
Gm42031	R0	2.49666e-239	1.30354
Ly9	R0	3.85398e-235	0.679417
Hdc	R0	3.62812e-227	1.44777
Angptl7	R0	1.31907e-225	0.455909
Cel	R0	4.68493e-225	0.297442
S100g	R0	9.15132e-221	0.909166
Hal	R0	2.77276e-220	1.4251
Rarres1	R0	8.14652e-220	1.82822
Serpinb12	R0	3.48646e-219	1.45381
Psors1c2	R0	1.64841e-218	1.71683
Efcab6	R0	5.89789e-216	0.257519
S100a9	R0	8.00836e-212	2.96748
Mcpt4	R0	5.88754e-210	0.372801
Svs4	R0	6.73916e-207	0.391536
Serpina12	R0	2.25928e-197	0.923607
Myl2	R0	3.04632e-194	0.393656
Tmem213	R0	2.29456e-191	0.31235
Apoh	R0	5.94825e-190	0.488824
Lcn11	R0	3.94582e-188	0.802893
Lyz2	R0	4.50391e-188	1.34409
Il4i1	R0	5.27726e-187	1.20325
Crybb1	R0	2.53202e-186	0.421719
Lcn3	R0	2.14014e-184	0.679941
Gstm3	R0	4.01048e-183	0.910301
Mia	R0	5.99983e-181	1.12561
Car1	R0	5.87468e-180	0.492763
Mfap5	R0	1.09422e-177	0.536643
Pcp4	R0	5.58524e-176	2.7513
Spink2	R0	7.91699e-175	0.284725
Tnmd	R0	6.86847e-173	0.978071
Ccl19	R0	6.27918e-169	1.05571
Fndc7	R0	2.54268e-167	0.848851
Gstm1	R0	6.67717e-167	1.30033
Klk1b22	R0	6.47013e-166	0.338369
Gm9112	R0	5.89811e-165	0.294386
Prlh	R0	1.29956e-163	0.300064
Ucma	R0	4.10457e-163	1.14127
Defb6	R0	6.4503e-163	0.779897
Adh7	R0	2.07957e-162	0.311705
Gm13010	R0	2.01804e-157	0.599306
Crhbp	R0	2.15759e-157	1.36551
Cst8	R0	7.53358e-157	0.635184
Cxcl9	R0	1.19166e-155	1.15892
Klk7	R0	1.33076e-153	0.642583
Gm13539	R0	4.35729e-153	1.17677
Mucl1	R0	8.79748e-149	0.681683
Madcam1	R0	8.12029e-147	1.16404
Gtsf1	R0	6.46671e-145	0.346498
Sprr1a	R0	4.90985e-142	1.36266
Lefty2	R0	1.81198e-140	0.740692
Slc24a1	R0	6.58094e-140	0.410603
Rcvrn	R0	3.01043e-139	0.367646
Obp2a	R0	1.05831e-138	1.25306
Bex1	R0	1.13642e-138	0.492927
AC139671.1	R0	2.76423e-138	0.960428
Ccl27a	R0	8.10965e-135	1.20541
Ak8	R0	1.04227e-134	0.411229
Omt2a	R0	1.21088e-134	0.318252
Gdf3	R0	2.01778e-133	0.264507
1700100L14Rik	R0	4.86847e-133	0.250148
Lgals3	R0	1.17217e-132	0.943735
C1qb	R0	4.63595e-132	0.83614
Olfr889	R0	6.15634e-132	0.268203
Dcpp2	R0	9.02359e-132	0.55944
Cadps	R0	1.41323e-131	0.919523
Apod	R0	4.79681e-131	1.01525
S100a7a	R0	7.39208e-130	0.318148
4930579C12Rik	R0	8.49399e-129	0.820995
S100a3	R0	2.3848e-127	0.816606
Crisp3	R0	4.99177e-127	0.380907
Prss34	R0	2.27506e-125	0.901619
Thrsp	R0	2.73909e-125	0.754181
BC037156	R0	6.24054e-125	0.819624
Gcg	R0	6.38185e-124	0.605847
Cela3b	R0	1.6361e-120	0.710952
Grifin	R0	6.36724e-120	0.603366
Plekha4	R0	1.89947e-119	1.00735
Csn1s2a	R0	2.51603e-119	1.09013
Tpsg1	R0	9.8521e-119	0.45391
Ampd1	R0	1.31941e-117	0.259907
Defb23	R0	2.04697e-116	0.417402
Cxcl13	R0	3.79616e-116	1.39578
Cpz	R0	1.17685e-115	0.258886
Gm29825	R0	1.23551e-112	0.318646
Tnnt3	R0	3.1509e-111	0.285362
Prg3	R0	1.66326e-110	0.897767
Bcl2a1d	R0	2.82209e-110	0.815206
Dppa3	R0	5.26761e-110	1.22344
Muc5ac	R0	6.4623e-110	0.300766
Siglece	R0	4.72698e-109	0.317596
Nts	R0	2.29167e-108	1.8006
Ces1d	R0	1.94451e-107	0.99659
Tac2	R0	3.34528e-105	1.45676
Npm2	R0	1.0249e-104	0.269498
Tph1	R0	7.22215e-104	0.534688
Igfbp6	R0	4.43328e-103	1.50263
Amtn	R0	1.14292e-102	0.471533
Rbp4	R0	2.72073e-101	0.34024
Cytl1	R0	2.58851e-99	1.15238
Psca	R0	2.90434e-99	1.88989
Pde6h	R0	2.57049e-98	0.690384
Dcpp3	R0	1.39802e-97	0.798583
C1qa	R0	1.44063e-97	0.462883
Cst10	R0	5.61116e-96	0.332197
Vmo1	R0	1.38726e-95	1.20148
Lce3d	R0	4.41821e-95	0.541047
Rps6kc1	R0	7.31577e-95	0.321987
Dnase1l3	R0	5.67802e-94	0.781751
Ncf1	R0	1.66472e-93	0.994975
Mbl2	R0	3.86963e-91	0.714802
Upk3a	R0	3.77579e-90	0.621043
Klk4	R0	1.19712e-89	0.490486
Fgf21	R0	3.76588e-89	1.62075
Tac1	R0	5.17536e-89	0.866237
Idi2	R0	7.86244e-89	0.321419
44621	R0	2.11669e-88	0.810097
Zp3	R0	5.12641e-88	0.321944
Cryba4	R0	5.21252e-88	0.472847
Myl4	R0	2.04929e-87	0.605184
Cartpt	R0	9.33905e-87	0.479451
Hand1	R0	2.1072e-85	0.311581
Cst9	R0	2.88565e-85	0.628826
Fabp7	R0	5.19695e-85	0.303188
Cilp	R0	2.26192e-82	0.458594
Coch	R0	4.72973e-82	0.699364
Tmprss11d	R0	5.93657e-82	0.419856
Cldn13	R0	7.41324e-82	1.23974
Saa2	R0	6.47258e-81	0.855489
Lxn	R0	4.40849e-80	1.08635
Csn1s1	R0	2.52861e-79	0.345844
Lce3b	R0	1.15936e-78	0.952069
Mup4	R0	3.96817e-77	0.27462
Pou5f1	R0	8.1893e-77	0.463171
Bcl2a1b	R0	8.71839e-76	0.545199
Pou2f2	R0	1.06347e-75	0.328373
Krt73	R0	1.15004e-75	0.255622
Zg16	R0	2.4532e-75	0.417584
Xcl1	R0	1.52089e-74	0.964762
Ces1f	R0	4.92713e-74	0.561213
Fcer1g	R0	9.0548e-74	0.611305
Sct	R0	1.90458e-72	1.51096
Actb	R0	2.899e-72	0.650781
Tesc	R0	1.01264e-70	0.656911
Nostrin	R0	2.63095e-70	0.283177
Nrg1	R0	1.38396e-69	0.712193
Klk6	R0	3.66427e-69	0.51934
Prg2	R0	2.22079e-68	0.888154
Retn	R0	4.84486e-68	0.533692
Apoa1	R0	8.98463e-68	1.12398
Cd207	R0	3.92513e-66	0.310019
Ghrh	R0	6.5922e-66	0.499804
Lrcol1	R0	1.16591e-65	0.591317
Car6	R0	1.39472e-65	0.468012
Gzmb	R0	1.98853e-65	0.380011
Sftpc	R0	1.0246e-64	0.342113
Lce3a	R0	1.18669e-64	0.522242
1520401A03Rik	R0	6.59024e-63	0.300822
Sprr2i	R0	4.92835e-61	1.54221
Apoa4	R0	1.91078e-60	0.462099
Crybb2	R0	2.2908e-60	0.678384
Fabp2	R0	4.11536e-60	0.299246
Il27	R0	1.17539e-59	0.280497
Ripply2	R0	1.45533e-59	0.278534
S100z	R0	9.64078e-59	0.519873
Krt71	R0	3.29758e-58	0.611468
Nefl	R0	3.34353e-58	0.34104
Defa29	R0	3.88119e-58	0.2669
Cacna1s	R0	7.61118e-58	0.471883
Bpifb1	R0	1.73852e-57	0.417593
Chit1	R0	9.75816e-57	0.456899
Cxcl17	R0	1.12539e-56	0.311925
Defb19	R0	1.65118e-56	1.39519
Cma1	R0	1.8787e-56	0.616995
Calb2	R0	2.12967e-56	1.18863
Mt2	R0	2.58242e-56	1.32904
Lyz1	R0	9.0519e-56	0.282696
Krt76	R0	2.37822e-55	0.556688
2300002M23Rik	R0	8.186e-55	0.300948
Prg4	R0	1.83266e-54	1.0954
Cxcl10	R0	2.08577e-54	0.828681
Retnla	R0	3.99218e-54	1.32269
Itih4	R0	6.88583e-54	0.281423
Itln1	R0	8.32531e-54	0.565511
Mt1	R0	1.2951e-52	1.4051
Ccl5	R0	2.92488e-52	1.02552
Serpina11	R0	2.43851e-51	0.436558
Dppa5a	R0	3.65205e-51	0.521984
Calb1	R0	1.484e-50	0.427055
Defb3	R0	1.91407e-50	0.630927
Gnmt	R0	2.29322e-50	0.326465
Alpl	R0	1.99358e-49	0.383299
Ppy	R0	2.08771e-49	1.472
Bpifb3	R0	2.70232e-49	0.349061
Rhox12	R0	1.1714e-47	0.752999
Defb45	R0	2.86089e-47	0.720331
Agxt	R0	3.71292e-47	0.343213
Psg27	R0	4.03264e-47	0.337424
Klk1b9	R0	5.06317e-47	0.90134
Tmsb15a	R0	7.27849e-47	0.296619
Sncg	R0	1.03599e-46	0.38865
Lcn6	R0	1.20414e-46	0.352191
Apol11b	R0	1.70928e-46	0.470243
Gm15056	R0	2.77026e-46	0.401159
Amelx	R0	3.99896e-46	0.418543
AA467197	R0	1.60489e-45	0.350634
Myl3	R0	1.80535e-45	0.45114
Gal	R0	5.24367e-44	2.27515
Gatm	R0	6.82775e-44	0.878946
Calca	R0	8.4978e-44	2.10508
C1qc	R0	1.37601e-43	0.424463
Tbc1d4	R0	2.53873e-43	0.959898
Cnmd	R0	6.69127e-43	0.33445
Tnnc1	R0	2.94882e-42	0.364722
Serpinb9	R0	5.44913e-42	0.280542
Cd79a	R0	1.70913e-41	0.25948
Fabp6	R0	6.2373e-41	2.72727
A630095E13Rik	R0	3.46494e-40	0.816592
1110008L16Rik	R0	6.27996e-40	0.559038
Ccl17	R0	4.73081e-38	0.854728
Gsdma2	R0	9.90266e-38	0.353171
Hoxb13	R0	1.99194e-37	0.307973
Gip	R0	4.70674e-37	1.33955
Fancd2	R0	1.29759e-36	0.372965
Utf1	R0	1.60787e-36	0.503248
Fam25c	R0	4.63053e-36	1.61303
St7	R0	8.15777e-36	0.271345
Cnfn	R0	1.00535e-35	0.287795
Tnni1	R0	1.09302e-35	0.724723
Sprr1b	R0	3.75037e-35	0.722827
Myl7	R0	3.80205e-35	0.434584
Gast	R0	7.77785e-35	0.529551
Apoa2	R0	1.08967e-34	0.990128
Ocm	R0	7.40837e-34	0.439645
Car4	R0	8.41737e-34	0.838305
Il13	R0	6.35628e-33	0.934602
H2-Q10	R0	7.73541e-33	0.553404
Mylpf	R0	8.95318e-33	0.5827
Htra4	R0	6.81886e-32	0.393602
Clps	R0	1.03857e-31	0.469001
Defa24	R0	1.23569e-31	0.797025
Gm17416	R0	1.56077e-31	0.708268
Snca	R0	1.91885e-31	0.327141
Tfap2b	R0	2.05406e-31	0.998388
Sat1	R0	4.35131e-31	0.726645
Nid1	R0	1.37579e-30	0.343835
Scgb1a1	R0	1.08153e-29	0.791327
Ctrb1	R0	2.59756e-29	0.872624
Oas1h	R0	5.61701e-29	0.434809
Prss28	R0	1.09838e-28	0.31236
Ly6h	R0	3.87103e-28	0.736735
Dlk1	R0	5.90062e-28	0.84426
Sass6	R0	7.93744e-28	0.260753
Ang4	R0	9.00019e-28	1.44627
Fabp3	R0	1.28301e-26	0.863759
Lypd2	R0	1.71769e-26	0.446081
Gm14161	R0	2.04523e-26	0.332883
Tslp	R0	2.11191e-26	0.293206
Prss2	R0	3.34852e-26	0.565655
Slpi	R0	4.03827e-26	1.22248
Dcpp1	R0	4.67368e-26	0.902965
Marco	R0	5.10538e-26	0.431264
Gchfr	R0	6.2053e-26	0.368719
Gkn1	R0	7.57831e-26	0.392419
Ascc1	R0	4.31397e-25	0.548762
Crip3	R0	1.69772e-24	0.273639
Lgals2	R0	1.99045e-24	1.01056
Cldn7	R0	2.53073e-24	0.367216
Il17b	R0	3.50573e-24	0.541188
Il12a	R0	2.09831e-23	0.295785
Sphk1	R0	2.4311e-23	0.615566
Gzmc	R0	2.55404e-23	0.272569
Gm6619	R0	5.77529e-23	0.335896
Sardh	R0	1.03683e-22	0.262037
Bpifb2	R0	3.91575e-22	0.308309
Csrp3	R0	4.9874e-22	0.586126
Ddt	R0	1.25151e-21	0.697887
Klk14	R0	2.85777e-21	0.717791
Gkn2	R0	6.51491e-21	0.419563
Prss29	R0	8.39417e-21	1.37704
Ces1a	R0	1.23099e-20	0.284574
Gm26870	R0	7.70945e-20	0.440608
BC048679	R0	9.68811e-20	0.578087
Procr	R0	1.63475e-19	0.347192
Nupr1	R0	1.74063e-19	0.647178
Wfdc12	R0	4.30366e-19	0.602277
Myl1	R0	2.05768e-18	0.263905
Clec3b	R0	3.10285e-17	0.290412
Spp1	R0	3.12139e-17	1.29269
Enpp2	R0	3.26963e-17	0.314862
Oxt	R0	3.37373e-17	0.439361
Car3	R0	5.63498e-17	0.315722
Cyp11a1	R0	3.08072e-16	0.371755
Krt4	R0	7.32374e-16	0.422215
Wnt8b	R0	9.031e-16	0.38345
Kng1	R0	1.19867e-15	0.269449
Oas1e	R0	2.23275e-15	0.485593
Adipoq	R0	4.34409e-15	0.353085
Myl10	R0	1.03429e-14	0.298719
Omt2b	R0	2.49421e-14	0.260766
Gad1	R0	4.70242e-14	0.373694
Ooep	R0	1.74294e-13	0.538271
Mpo	R0	2.00902e-13	0.469991
Krt9	R0	3.32157e-13	0.324034
Gh	R0	4.79618e-13	0.297937
Tff2	R0	5.37717e-13	1.03611
Pla2g1b	R0	1.40309e-12	1.69693
Cxcl1	R0	3.26972e-12	0.599366
Klk5	R0	4.03749e-12	0.62376
Hbb-bs	R0	5.07846e-12	0.545376
Pga5	R0	2.91851e-11	0.491694
Ngp	R0	3.05885e-11	0.684074
Cck	R0	3.25818e-11	1.40281
Lcn8	R0	4.67974e-11	0.503033
Scgb1c1	R0	8.57049e-11	0.872278
Il23a	R0	1.12331e-10	0.650465
Gstm5	R0	5.07507e-10	0.406481
Hacl1	R0	7.77491e-10	0.280585
Clec4f	R0	1.91123e-09	0.408883
Oas1d	R0	2.0199e-09	0.366434
Rsad2	R0	2.24228e-09	0.398008
Cyp1a2	R0	2.36712e-09	0.596388
Cga	R0	2.66854e-09	1.21761
Slurp2	R0	4.20288e-09	0.431178
Tnfrsf11b	R0	7.57188e-09	0.507568
Wnt6	R0	9.52659e-09	0.25671
Phgdh	R0	2.60661e-08	0.252885
Prph	R0	6.67112e-08	1.01338
Klk1b1	R0	1.38627e-07	0.350713
Eno3	R0	3.33087e-07	0.682213
Cst3	R0	3.38121e-07	0.503946
Aldob	R0	5.04625e-07	0.451665
Pyy	R0	8.37478e-07	2.32658
Slc51a	R0	2.6497e-06	0.396207
Ces1h	R0	4.26168e-06	0.477927
Rasd1	R0	6.51425e-06	0.352657
Spi1	R0	1.46246e-05	0.333221
Cxcl2	R0	1.55801e-05	0.649555
Bglap2	R0	3.04542e-05	0.574006
Cdkn1a	R0	4.53914e-05	0.260486
Rprm	R0	6.3569e-05	0.627267
Pvalb	R0	6.85013e-05	0.303344
Cryaa	R0	0.000111731	1.02048
Neb	R0	0.00045373	0.266506
Klk8	R0	0.00122364	0.324343
Reg3b	R0	0.00127432	0.262101
Phgr1	R0	0.00227257	0.667891
2610528A11Rik	R0	0.00231142	0.57334
Alox12e	R0	0.00483438	0.259182
Pkib	R0	0.00548775	0.487863
Dnajc7	R0	0.0110004	0.492682
Tdo2	R0	0.0129533	0.537246
Tff3	R0	0.0154722	1.06885
Akr1c18	R0	0.0285347	0.512602
Pclaf	R1	0	2.22878
Hmgb2	R1	0	2.22404
H2afz	R1	0	2.05326
Tuba1b	R1	0	2.01619
Tubb5	R1	0	1.94692
Stmn1	R1	0	1.92532
Top2a	R1	0	1.79261
Cks1b	R1	0	1.6818
Ran	R1	0	1.6693
Cks2	R1	0	1.64843
Hmgn2	R1	0	1.51338
Birc5	R1	0	1.30506
Tyms	R1	0	1.21569
Dut	R1	1.97571e-304	1.36476
Ccna2	R1	4.32073e-291	1.0855
Ube2s	R1	4.22538e-290	1.38325
Ube2c	R1	4.37041e-276	1.84986
Cdk1	R1	1.63328e-273	1.56983
H2afx	R1	1.12907e-264	1.37125
Ccnd2	R1	2.16849e-252	1.30045
Vim	R1	3.04139e-236	1.08996
Phgdh1	R1	6.72938e-229	1.22891
Lockd	R1	8.66279e-220	1.07933
Tmem158	R1	1.59154e-214	1.1713
Utf11	R1	5.56536e-213	1.10175
Nusap1	R1	7.39242e-213	1.10011
Cdca3	R1	8.13404e-204	0.908403
Ccnb1	R1	3.61512e-193	0.976656
Cdca8	R1	5.10498e-187	1.12558
Hsp90aa1	R1	3.87154e-181	0.855413
Mt21	R1	2.51627e-175	0.70878
Cenpf	R1	5.11441e-169	1.28258
Rrm2	R1	5.7313e-161	1.05922
Hist1h2ap	R1	5.42646e-147	1.17438
Cenpa	R1	2.52563e-141	0.875505
Ccnb2	R1	4.55754e-120	0.863471
Lgals1	R1	1.44401e-100	0.656702
Cdc20	R1	1.80613e-96	1.06968
Spc24	R1	3.85429e-88	0.795119
Olfm4	R1	1.01783e-86	0.595835
Tubb4b	R1	1.03292e-79	0.652392
Krt17	R1	5.15462e-73	0.456328
Hist1h2ae	R1	1.21011e-71	0.666873
H2afv	R1	3.20722e-68	0.330014
Tubb6	R1	6.03099e-64	0.555301
Mns1	R1	3.82072e-39	0.352885
Prc1	R1	1.78652e-38	0.732155
Hist1h1b	R1	1.46882e-31	0.478904
Melk	R1	1.43956e-30	0.44969
Hist1h1e	R1	8.60089e-19	0.480133
Igkc	R1	2.87999e-10	0.310757
Ccl21a	R2	2.1411e-272	1.41587
Wfdc18	R2	3.22491e-196	1.19013
Rgs5	R2	6.07402e-191	1.27984
Krt5	R2	1.51251e-177	1.14153
Krt171	R2	9.90002e-161	0.977384
Lgals11	R2	2.54975e-92	0.970614
Tagln	R2	1.53355e-91	0.770371
Krt14	R2	1.88769e-82	0.696121
Acta2	R2	2.43685e-44	0.335194
Igfbp5	R2	1.18957e-41	0.935313
Vim1	R2	6.17922e-40	0.675793
Hspb1	R2	3.40283e-31	0.529552
Ccnd21	R2	5.88291e-31	0.78905
Stmn2	R2	1.11132e-30	0.98988
Gm8113	R2	2.93867e-27	1.44876
Tmem1581	R2	4.16968e-25	0.272619
Fos	R2	7.17677e-22	0.551283
Cxcl14	R2	1.38851e-15	0.652198
Id1	R2	5.08392e-13	0.776877
Des	R2	4.50565e-12	0.363759
Socs3	R2	2.14452e-11	0.756197
Gm42418	R2	2.28632e-09	1.11238
Tekt5	R2	1.86441e-08	0.275491
Pvalb1	R2	6.71623e-08	0.303241
Nkx6-2	R2	9.98999e-07	0.279535
Msln	R2	1.00122e-06	0.268821
Cxcl101	R2	0.00134586	0.364765
Rrad	R2	0.00300617	0.73599
Cd521	R3	0	2.13245
Ubd1	R3	1.72917e-283	1.58203
Sncg1	R3	1.10618e-205	1.99735
Il12a1	R3	8.9363e-179	1.53338
Srgn1	R3	3.28193e-168	1.30362
Gm420311	R3	5.4608e-155	1.59173
Ebi3	R3	3.06761e-151	0.924882
Hamp	R3	9.77331e-137	1.14126
Timd2	R3	4.48896e-134	0.479371
Anxa10	R3	1.06299e-133	1.16467
Gstm6	R3	1.20128e-131	0.605455
Cxcl21	R3	1.0496e-127	1.34687
Nos2	R3	3.92665e-120	1.19141
Ripply21	R3	1.36674e-119	1.35665
Ccl51	R3	1.77959e-113	2.30419
Resp18	R3	6.40849e-113	1.87408
Il271	R3	5.2831e-109	1.08284
Bcl2a1b1	R3	1.42244e-107	1.13495
Igf1	R3	1.623e-106	1.66655
S100g1	R3	1.75931e-105	1.3499
Il131	R3	2.58994e-105	1.39539
Smtnl1	R3	3.46571e-100	1.29515
Krt81	R3	2.73383e-99	0.596942
Fabp9	R3	4.34665e-97	1.36977
AW112010	R3	7.89111e-97	0.981583
Plekha41	R3	1.41235e-92	1.38768
Psors1c21	R3	3.24071e-92	1.22445
Cd70	R3	2.34501e-91	1.37817
Ccl27a1	R3	4.24548e-90	1.78725
S100a6	R3	4.25331e-89	1.28712
Ahcyl2	R3	3.45493e-88	0.996064
Fabp4	R3	2.58695e-87	1.07386
Nupr11	R3	3.05574e-86	0.653231
Serpinb91	R3	1.6363e-85	1.03251
Tspan18	R3	8.825e-84	0.724526
Cacna1s1	R3	6.67242e-83	0.399645
Ccl22	R3	3.78344e-78	1.60961
Zp2	R3	9.70822e-77	0.55376
Nrg11	R3	4.50382e-74	0.619581
Crybb11	R3	8.82512e-73	0.431178
Ly6i	R3	5.92346e-72	1.10262
Gsta2	R3	4.68856e-71	1.1998
Bcl2a1d1	R3	3.11867e-68	0.838021
Ptgs2	R3	3.92203e-68	1.04182
Fxyd2	R3	5.38037e-68	0.577646
Dnase1l31	R3	1.74286e-67	0.997658
Nostrin1	R3	1.82766e-67	0.629649
Lta	R3	2.39461e-65	0.466922
Csn21	R3	2.05613e-64	0.603141
Ces2c	R3	7.07578e-61	0.658626
AA4671971	R3	6.22344e-59	0.564835
Rarres2	R3	7.02373e-58	0.784782
Tnfaip6	R3	1.75892e-54	0.679167
Ccl191	R3	4.36431e-54	1.00001
1700029F12Rik1	R3	1.46438e-53	0.42237
Cldn4	R3	2.72389e-53	0.890657
Ccdc184	R3	4.3913e-52	0.904629
Trf	R3	4.00538e-49	0.363602
AU015791	R3	9.18536e-48	0.465597
Crip1	R3	1.23572e-47	0.637311
Krt711	R3	2.64348e-47	0.315832
Serpine1	R3	7.42578e-44	0.551701
Krt91	R3	8.81889e-44	0.275836
Gstt1	R3	1.92778e-41	0.686847
Fcer1g1	R3	2.72367e-41	1.45199
Skint9	R3	1.83778e-40	0.95893
Cldn3	R3	1.95603e-38	0.549203
Defb61	R3	3.59262e-38	0.501224
Gjb2	R3	9.43895e-38	0.557141
Cldn71	R3	1.49429e-37	0.851399
Lypd8	R3	2.21705e-36	0.494749
Alas1	R3	6.49256e-36	0.892168
M1ap	R3	3.58017e-35	0.702771
Wfdc21	R3	5.76279e-35	0.836588
44631	R3	3.93194e-34	1.00807
2210407C18Rik	R3	5.03418e-34	1.10985
Tnmd1	R3	1.00548e-33	0.487772
Fam25c1	R3	9.5684e-33	0.259313
Mylpf1	R3	5.6331e-31	0.544901
Tmem37	R3	6.30186e-31	0.312012
Alms1	R3	1.304e-30	0.358644
Lypd21	R3	1.31545e-29	0.701202
Cadps1	R3	1.49987e-28	0.980566
Rps6kl1	R3	1.79843e-28	0.357178
Prg31	R3	8.65029e-28	0.55706
Tnnt2	R3	1.53672e-27	0.64851
Retnla1	R3	1.24252e-26	0.250288
Cdkn1a1	R3	8.09949e-26	0.58709
Slpi1	R3	1.3025e-25	0.475663
Cdhr5	R3	3.4573e-25	0.329885
Iglc3	R3	3.97063e-25	1.0113
Spink4	R3	1.10049e-24	0.273096
Aoc1	R3	2.31429e-24	0.715006
Cxcl11	R3	3.68253e-24	0.585926
Asprv1	R3	3.31646e-23	0.486163
1110008L16Rik1	R3	6.66394e-23	0.866161
Slamf7	R3	1.17073e-22	0.251797
Dgat2	R3	1.28529e-22	0.799332
Pla2g1b1	R3	2.27382e-22	0.483179
Lyz11	R3	2.58015e-22	0.281917
Hal1	R3	5.43768e-22	0.583725
Lyz21	R3	7.24621e-22	0.777481
Chchd10	R3	3.99872e-21	0.552215
Serpinb2	R3	4.54052e-21	0.391015
Serpinb1a	R3	5.35943e-21	0.47486
H1foo	R3	6.20286e-21	0.503672
Vmo11	R3	7.22188e-20	1.10653
Aire1	R3	2.52228e-19	0.586923
Ddt1	R3	4.52025e-18	0.606898
Hdc1	R3	6.25079e-18	0.545198
Ttll9	R3	8.8865e-18	0.458166
Il4i11	R3	2.14525e-17	0.433099
Cldn131	R3	6.10475e-17	0.628015
Ccl2	R3	2.48712e-15	0.551891
Nxpe31	R3	2.98719e-15	0.362394
Ucma1	R3	5.18451e-15	0.590387
Rasd11	R3	1.29243e-14	0.468878
Gtpbp4	R3	3.46464e-14	0.400987
Cnmd1	R3	1.87587e-13	0.359027
Cybb	R3	2.63445e-13	0.265602
Sat11	R3	6.76857e-13	0.682551
Ces1d1	R3	8.7796e-13	0.906532
Ncf11	R3	1.06714e-12	0.54305
Cryba2	R3	3.21012e-12	0.340266
Il23a1	R3	4.908e-12	0.599269
H2-Q101	R3	2.7163e-11	0.733254
Cdkn1c	R3	3.42896e-11	0.525614
Ccr7	R3	6.82977e-11	0.540111
Ceacam15	R3	7.27449e-11	0.36691
A630095E13Rik1	R3	8.72586e-11	0.769541
Igfbp61	R3	3.2408e-10	0.348937
Crip31	R3	6.42743e-10	0.619703
Pvalb2	R3	6.66785e-10	0.632924
Krt42	R3	1.25648e-09	0.253193
Selenom	R3	1.54771e-09	0.458441
Sct1	R3	6.39974e-09	0.266848
Pinlyp	R3	2.33019e-07	0.561615
Ooep1	R3	5.16315e-07	0.64216
Gm142751	R3	9.49112e-07	0.831424
Krt79	R3	1.08272e-06	0.264536
Calcb1	R3	1.8782e-06	0.344282
S100a31	R3	2.32173e-06	0.469289
Cryab	R3	7.19095e-06	0.366729
Nsmce11	R3	9.40606e-06	0.288744
Ctrb11	R3	1.04223e-05	0.545729
Gm368991	R3	1.91223e-05	0.333166
Tstd1	R3	8.24407e-05	0.37419
Gstm11	R3	0.000185365	0.812937
Nmb	R3	0.00103383	0.434809
Gm298251	R3	0.00380364	0.460456
Tgm3	R3	0.00893912	0.257201
Ptgds1	R3	0.0429903	0.519295
Ccl171	R3	0.0433565	0.840262
Mgp	R4	0	2.85706
Gpx3	R4	0	2.76554
Ccl21a1	R4	0	2.66361
Apoe	R4	0	2.52593
Anxa2	R4	0	2.20488
Ctsl	R4	1.89268e-286	1.49653
Tagln1	R4	9.92334e-261	2.04098
Hpgd	R4	5.40273e-252	2.03196
Isg15	R4	1.14094e-229	1.61277
Anxa1	R4	3.52267e-187	1.13678
Krt141	R4	9.52895e-183	1.60512
Id11	R4	8.20515e-167	1.40691
Ly6a	R4	8.18945e-160	1.39102
Krt51	R4	8.67728e-158	1.08592
Cst31	R4	3.92097e-156	0.691251
Acta21	R4	1.92541e-150	2.00897
Igfbp51	R4	8.03927e-138	1.46589
Sparc	R4	1.00707e-132	1.07883
Cyr61	R4	3.81291e-124	1.74873
Igfbp2	R4	8.67681e-124	1.49347
Krt172	R4	9.86403e-124	0.670474
Gsn	R4	1.52693e-121	1.37304
Pltp	R4	7.07797e-115	1.03491
C31	R4	7.44225e-109	1.00308
Myl9	R4	4.25013e-107	1.31883
S100a10	R4	9.37741e-94	0.61832
Gas1	R4	2.93578e-93	1.09385
Ifit3	R4	1.26913e-91	1.3753
Lgals12	R4	2.57196e-89	1.03548
Sostdc1	R4	8.77947e-81	0.907003
Dcn	R4	3.14887e-78	1.11425
Gm424181	R4	3.78559e-78	0.277973
Ccl11	R4	7.43721e-77	1.26039
Apoc1	R4	1.10339e-64	1.20723
Fst	R4	3.9649e-62	1.14689
H2-M2	R4	5.82329e-61	0.647852
Ptn	R4	8.76544e-57	1.08326
Mgst1	R4	1.14494e-56	0.682065
Hspb11	R4	1.85919e-55	0.729402
S100a61	R4	9.01688e-54	0.382021
Serping1	R4	1.79613e-45	0.644923
Serpinb1a1	R4	4.33087e-42	0.254928
Timp1	R4	3.43487e-37	0.435504
Des1	R4	6.38039e-34	0.543549
Sprr2a3	R4	3.13049e-33	1.70643
Clu	R4	1.59707e-31	0.292632
1500015O10Rik	R4	1.6016e-27	0.647683
Tubb61	R4	8.90446e-25	0.45626
Socs31	R4	3.33527e-24	0.753828
Klf2	R4	1.08314e-22	0.541489
Crybb3	R4	7.83746e-22	0.316906
Cxcl141	R4	1.02043e-21	0.727748
Gm81131	R4	5.34684e-21	0.743948
Fos1	R4	2.95699e-20	0.696079
Rasl11a	R4	1.16548e-17	0.67462
Rgs4	R4	1.9258e-17	0.83718
Igtp	R4	5.14355e-17	0.334271
Lbp	R4	4.5591e-15	0.275842
Rrad1	R4	3.90812e-07	0.425207
Rdh12	R4	8.80187e-05	0.274044
G0s2	R4	0.000124499	0.335551
Krt52	R5	0	2.24318
Ccl21a2	R5	0	2.09016
Krt142	R5	8.15008e-295	2.17326
Ly6a1	R5	6.34745e-272	1.95379
Apoe1	R5	4.49048e-257	1.93273
Ccl111	R5	1.83365e-251	2.84335
Isg151	R5	5.41335e-233	1.76836
Hspb12	R5	1.84466e-222	1.74541
Wfdc181	R5	1.17728e-212	1.41809
Anxa11	R5	4.13748e-209	1.69529
Gm81132	R5	1.8621e-203	2.27464
Krt173	R5	8.05807e-189	1.32916
Krtdap	R5	2.02749e-181	1.26338
Urah	R5	1.13552e-177	1.41874
Tagln2	R5	5.65296e-169	1.60624
Acta22	R5	2.79745e-163	1.77288
Fxyd3	R5	1.42127e-153	1.13093
Dapl1	R5	4.07346e-151	0.689489
Rgs51	R5	3.12777e-147	1.39661
Id12	R5	7.83461e-132	1.31283
Gpx31	R5	4.18508e-130	1.11229
Gsn1	R5	9.93781e-121	1.4201
Ifit31	R5	3.61191e-113	1.59081
Mgp1	R5	2.34232e-111	1.06013
C32	R5	3.9003e-95	1.03621
Clu1	R5	1.44318e-93	1.11988
Fth1	R5	4.16925e-86	0.413641
Mgst11	R5	3.46749e-78	0.91275
S100a101	R5	1.84511e-76	0.677403
Cyp2f2	R5	3.68242e-71	1.24491
Anxa21	R5	5.68876e-68	0.732271
Hpgd1	R5	6.24144e-57	1.1498
Serpinb1a2	R5	1.20133e-55	0.290237
Apoc11	R5	6.03604e-52	0.631563
Timp11	R5	2.15987e-51	0.957139
H2-M21	R5	4.98871e-50	0.824174
Fst1	R5	1.28449e-49	0.895631
Gas11	R5	9.0345e-46	1.01965
Alox12e1	R5	4.76772e-45	0.558813
Ifitm1	R5	2.11033e-44	0.826582
Trem2	R5	8.52635e-43	1.01379
Ly6d	R5	2.53984e-38	0.799369
Lgals13	R5	3.93603e-28	0.593092
Gpx2	R5	1.95552e-27	0.687948
Rgs41	R5	2.82817e-24	0.886647
Rrad2	R5	1.01589e-23	0.886707
Cxcl142	R5	5.75224e-16	1.02883
Plet1	R5	2.35703e-13	0.319682
Ass1	R5	1.64264e-12	0.36087
Tubb62	R5	4.16001e-12	0.343074
Cxcl102	R5	4.30072e-12	0.480893
Fos2	R5	4.52341e-10	0.522939
Myl91	R5	2.01186e-09	0.406733
Sostdc11	R5	7.98133e-07	0.545852
Socs32	R5	1.2927e-05	0.488672
Stmn21	R5	1.59657e-05	0.793017
Cyr611	R5	3.84799e-05	0.717959
Calml3	R5	9.40624e-05	0.337239
CR974586.5	R5	0.00208524	0.431417
Igtp1	R5	0.0240282	0.336823
Gng13	R6	0	4.39678
Lrmp	R6	0	3.99217
Ly6g6f	R6	0	3.35641
Avil	R6	0	3.15297
Rgs13	R6	0	3.00178
Sh2d6	R6	0	2.83359
Trpm5	R6	0	2.50733
AC191865.2	R6	0	1.69364
Gnat3	R6	0	1.49922
A630073D07Rik	R6	0	1.49084
Rgs21	R6	2.00249e-298	0.954762
Alox5ap	R6	4.01297e-290	4.12805
Gnb3	R6	2.79077e-288	3.32622
Ptpn18	R6	3.36842e-279	3.29329
Ltc4s	R6	2.86261e-268	3.03935
Ovol3	R6	5.66351e-253	1.66522
Plac8	R6	9.95242e-252	3.58645
Espn	R6	5.7735e-251	2.90838
Bmx	R6	2.71669e-248	2.10412
Fxyd6	R6	6.62077e-245	2.75432
Ahnak2	R6	7.04794e-222	2.71242
1810046K07Rik	R6	8.54036e-217	1.88747
Aldh2	R6	1.48369e-216	2.58926
Hck	R6	3.17696e-216	2.36239
Chil1	R6	4.8659e-215	2.57023
Fyb	R6	1.70514e-211	2.38221
Plcb2	R6	1.53226e-203	1.75418
Rgs2	R6	1.56569e-192	2.56772
Nrgn	R6	1.64032e-189	2.71452
Atp2a3	R6	1.6239e-184	1.78957
Plk2	R6	1.68698e-177	2.22565
Dclk1	R6	4.01854e-175	2.73541
Cd24a	R6	1.85591e-159	2.59051
Mctp1	R6	5.67779e-156	2.26565
Selenom1	R6	6.94901e-155	2.08354
Crip11	R6	1.83348e-142	1.60453
Il25	R6	2.74549e-136	1.45387
Angptl3	R6	6.80196e-120	0.265326
Tas2r105	R6	4.42035e-117	0.952339
Atp1a2	R6	1.10173e-111	2.22853
Krt19	R6	1.85579e-111	1.91519
Tspan6	R6	1.69538e-110	2.15553
Tmem45b	R6	3.86908e-109	1.33602
Cyp2g1	R6	4.68344e-109	0.768241
Atp1b1	R6	6.61855e-93	1.16108
Car7	R6	4.87786e-92	1.51976
Hamp2	R6	2.98608e-88	1.09142
Tspan1	R6	1.3056e-85	1.26598
Cited2	R6	3.06137e-79	2.18191
Nefl1	R6	1.07282e-76	0.620226
Matk	R6	1.19688e-76	1.29449
Lipc	R6	5.13147e-76	1.29209
Gm26797	R6	2.61271e-75	2.4336
Hepacam2	R6	5.50846e-74	1.39015
Ascl2	R6	9.81075e-64	0.850861
Krt18	R6	4.09978e-59	0.804691
Bex4	R6	1.69731e-57	0.843166
Epgn	R6	2.87285e-56	0.416046
Adh1	R6	1.53455e-53	0.828051
Chchd101	R6	2.27136e-52	0.964049
Crym	R6	4.65969e-47	0.963156
Pygl	R6	5.25224e-44	1.13217
Gp2	R6	1.60745e-43	0.530411
Dtnb	R6	1.95849e-42	1.21726
Cdkn1a2	R6	5.66006e-42	0.639448
Tspan8	R6	9.24425e-42	0.908286
Snhg18	R6	4.92343e-31	1.2368
Nxpe2	R6	3.69464e-29	0.279791
Snca1	R6	5.76811e-29	0.371203
Sct2	R6	1.10836e-27	0.687987
Cldn72	R6	1.77939e-27	0.66786
Ctsc	R6	5.32021e-25	1.1253
Chga	R6	2.40316e-23	0.932648
Etv1	R6	3.49615e-23	0.583563
Car2	R6	3.49989e-20	0.923127
Pir	R6	2.78333e-15	0.486646
Cldn31	R6	2.05248e-14	0.583349
Slc12a2	R6	1.68664e-12	0.289681
Bcl2l14	R6	3.46801e-11	1.19796
Dst	R6	8.20325e-10	0.256682
Ltb	R6	1.47103e-08	0.251486
Cryba21	R6	7.96351e-08	0.644493
Upp1	R6	4.99963e-07	0.707943
Ttc36	R6	1.77373e-06	0.372005
Hsp90aa11	R6	6.24164e-06	0.330965
Tppp3	R6	1.60762e-05	0.711701
Mgll	R6	2.38952e-05	0.514128
Fos3	R6	0.00172072	0.594225
Ahcyl21	R6	0.00223903	0.37779
Nrep	R6	0.00559782	1.45425
Cdkn1c1	R6	0.00657838	0.857325
Spink5	R7	4.59731e-234	3.36797
Pdzk1ip1	R7	8.22577e-210	2.38955
Dmkn	R7	4.9611e-164	3.64428
Calm4	R7	1.89653e-160	3.89209
Gsta4	R7	3.06202e-159	2.77276
Dapl11	R7	4.42446e-158	3.94396
Ly6d1	R7	3.69777e-157	3.00187
Calml31	R7	6.08863e-154	2.46244
Lypd3	R7	6.576e-154	1.95981
Rptn	R7	1.68462e-151	2.42232
Fxyd31	R7	6.62204e-151	2.07205
Sdr16c5	R7	2.74714e-150	0.376557
Orm1	R7	6.96952e-147	2.2268
Clic3	R7	1.45307e-146	1.98285
Oit1	R7	5.20524e-144	2.17906
Gm94	R7	1.18313e-138	3.47884
Prss27	R7	1.48276e-138	0.782294
Sbsn	R7	4.52968e-138	3.46088
Krt231	R7	3.90753e-137	1.63155
Asprv11	R7	6.83849e-121	2.50023
Cst6	R7	1.58439e-111	3.52081
Ly6g6c	R7	4.6581e-105	2.62886
Cyp2a5	R7	1.8616e-104	2.4973
Klk13	R7	1.87791e-103	1.51659
Cnfn1	R7	8.52765e-95	2.4256
Krt78	R7	1.29602e-93	1.70986
Hspb13	R7	4.92482e-91	1.68457
Krtdap1	R7	7.05403e-85	4.30607
Gc	R7	1.41076e-84	1.14331
Sprr2d	R7	5.11385e-84	0.894994
Serpinb7	R7	1.4577e-83	0.889642
Serpinb11	R7	1.73916e-83	1.29325
Csta1	R7	2.52933e-83	0.857957
Nupr12	R7	2.93931e-82	2.24018
Serpinb21	R7	7.35509e-82	2.34493
Krt16	R7	3.34752e-81	2.34944
Atp1b11	R7	3.42662e-80	1.50323
Urah1	R7	8.30013e-80	1.79697
Psapl1	R7	9.55021e-80	1.21467
Gsdma	R7	2.36443e-78	0.745386
Hrnr	R7	2.9516e-78	0.872707
Fabp41	R7	5.10535e-77	1.71014
Cdsn	R7	5.18177e-70	0.486518
Lgals7	R7	1.2989e-67	4.05412
Flg	R7	1.53671e-66	2.14438
Fam84a	R7	8.30261e-66	1.35236
Pla2g2f	R7	1.28499e-63	0.743789
Bcl2a1b2	R7	2.1877e-63	0.999141
Sdr16c6	R7	2.97638e-63	0.992883
Hp	R7	8.4125e-63	1.05001
Cdkn2a	R7	9.01389e-61	1.5403
Fam25c2	R7	1.05717e-60	2.18042
Wfdc211	R7	6.58348e-59	2.39354
Krt10	R7	1.16669e-58	3.30608
Cdkn1a3	R7	4.78775e-58	1.55757
Mmp7	R7	1.01684e-56	1.02524
Ivl	R7	2.8733e-56	0.759074
AA4671972	R7	4.28352e-55	1.29424
Cyp2f21	R7	7.36839e-53	1.64465
Selenom2	R7	9.61258e-51	1.61496
Cxcl3	R7	4.7021e-50	1.15627
Klk1b11	R7	4.91223e-48	1.76874
Prss22	R7	3.162e-47	0.351444
Chil11	R7	4.05039e-47	1.83718
Il1f6	R7	4.72245e-47	1.43499
Pinlyp1	R7	6.60961e-47	1.27652
Klk71	R7	8.73465e-47	1.26972
Klk1b91	R7	5.77037e-45	1.3325
Sftpa1	R7	9.5174e-45	0.277854
Lypd22	R7	4.57257e-44	2.02319
Tmem45a	R7	5.07754e-44	2.00291
Tspan81	R7	3.07628e-43	1.45752
Klk1b12	R7	5.53868e-43	0.820813
Slurp1	R7	6.92938e-43	1.94661
Defb62	R7	1.37157e-41	2.56957
Gjb21	R7	1.66759e-41	0.49318
Cxcl5	R7	2.61255e-41	1.25887
Cysrt1	R7	1.04718e-40	1.09846
Klk1b16	R7	2.08812e-40	2.05312
Tspan11	R7	3.76432e-40	0.795487
Gsn2	R7	1.1514e-39	0.881154
Cldn41	R7	2.84868e-39	0.971372
Ltf	R7	7.29613e-39	2.28293
Pglyrp1	R7	2.51005e-37	0.939312
Gabrp	R7	2.80396e-37	1.12594
Fabp5	R7	4.25116e-37	1.11475
Gsta21	R7	2.24676e-36	1.42533
Crabp2	R7	2.32148e-36	0.757956
Wfdc2	R7	6.11168e-36	3.3256
Spink1	R7	8.65457e-36	2.89125
Dbi	R7	1.06704e-35	1.23733
Anxa12	R7	1.90299e-34	1.66153
Stfa3	R7	3.65951e-32	0.892835
Iapp	R7	8.53195e-32	2.07339
Ttc361	R7	9.45094e-32	1.44264
Ebi31	R7	1.07786e-31	0.615763
Scgb1a11	R7	1.08337e-31	2.95912
Cd14	R7	4.3286e-31	0.837551
Saa1	R7	2.05539e-30	2.07571
2200002D01Rik	R7	2.55162e-30	0.965913
Sprr1a1	R7	6.57533e-30	2.21908
Gjb6	R7	1.16365e-28	0.627703
Crnn	R7	2.3473e-28	0.51594
2010109I03Rik	R7	1.11633e-27	0.511205
Spink12	R7	1.76101e-27	2.7359
Cyp2g11	R7	2.39689e-27	1.16267
Bpifa1	R7	4.44222e-27	3.64046
Sat12	R7	1.90979e-25	1.20017
Klk1b27	R7	1.99038e-25	0.520019
Sftpd1	R7	2.90072e-25	1.46498
Nccrp1	R7	3.67337e-25	1.03396
Klk1b26	R7	4.39782e-25	2.80257
Cd24a1	R7	5.11974e-25	0.646598
Crct1	R7	1.60237e-24	2.72197
Pir1	R7	1.83256e-24	0.63014
Wfdc182	R7	3.75953e-24	1.19952
Myl71	R7	2.60608e-23	1.45722
Krt791	R7	8.06699e-23	1.90955
Il1f5	R7	9.06791e-23	0.8013
Krt41	R7	5.8361e-22	0.652417
Psca1	R7	2.61134e-21	0.858846
Aqp5	R7	3.34388e-21	0.53331
8430408G22Rik	R7	5.04632e-21	1.24321
Krt75	R7	8.84334e-21	0.392495
Saa3	R7	1.92667e-20	2.23825
Pla2g2e	R7	2.44928e-20	0.509259
Krt77	R7	3.32216e-20	1.98919
Gsto1	R7	4.26023e-20	2.57309
Ldhb	R7	2.20375e-19	0.85761
Dgat21	R7	8.3812e-18	0.80971
AW1120101	R7	3.36325e-17	0.870364
Cybb1	R7	8.9249e-17	0.325684
Ahcyl22	R7	6.35212e-16	0.95365
Gm2a	R7	1.66275e-15	1.26047
Klk81	R7	3.18917e-15	0.682383
Clu2	R7	6.36146e-15	0.922534
Ly6a2	R7	9.43096e-15	0.588182
Ear1	R7	1.26567e-14	1.09659
Plet11	R7	2.6825e-14	0.864177
Adh11	R7	3.14401e-14	0.534887
Pigr	R7	8.70383e-14	0.969564
Msln1	R7	2.07526e-13	0.75604
Fabp91	R7	2.19246e-13	2.28072
Serpina7	R7	2.94339e-13	1.37646
Upk3a1	R7	5.74168e-13	1.46769
Klk61	R7	1.5778e-12	0.910138
Ly6i1	R7	3.53703e-12	0.750275
Klk141	R7	4.36818e-12	0.790984
Defa241	R7	8.54594e-12	0.360368
Wfdc17	R7	1.28284e-11	1.35547
Ooep2	R7	1.37711e-11	0.432154
Cryba22	R7	1.93708e-11	0.288691
Rnase1	R7	2.06005e-11	1.13038
Alas11	R7	2.25258e-11	0.812665
Ptgr1	R7	8.09533e-11	0.446215
Cldn32	R7	1.9595e-10	0.706916
Car12	R7	3.22572e-10	0.577722
Krt6a	R7	3.56505e-10	1.06649
Hbegf	R7	3.80665e-10	0.413571
Gsta1	R7	7.86367e-10	0.931304
Slurp21	R7	1.62621e-09	0.476006
Sprr1b1	R7	3.27899e-09	0.642654
Ly6k	R7	3.49308e-09	0.770012
Lgals4	R7	5.40571e-09	0.937165
Reg3g	R7	5.78724e-09	2.08457
Krt1	R7	7.31853e-09	2.1698
S100a91	R7	9.51239e-09	0.499983
Lcn2	R7	1.76489e-08	1.3853
Pck1	R7	1.8508e-08	0.312708
Klk1	R7	4.13728e-08	1.37034
S100a62	R7	5.38083e-08	0.708081
Bcl2a1d2	R7	9.56904e-08	0.474278
Krt174	R7	1.1923e-07	1.00963
Resp181	R7	2.03209e-06	1.19341
Cdkn1c2	R7	2.79534e-06	1.30387
Serpina3j	R7	3.22047e-06	0.833489
Cd522	R7	5.43576e-06	1.04935
Ankrd37	R7	8.2963e-06	0.257987
Ltc4s1	R7	1.01556e-05	0.358196
Bglap3	R7	1.85178e-05	0.963493
Igf11	R7	3.07584e-05	1.12062
Lgals31	R7	3.64062e-05	0.397882
Ahnak21	R7	3.83179e-05	0.358504
Krt84	R7	3.91452e-05	0.851907
Ces2c1	R7	0.000151454	0.395097
Skint91	R7	0.000201281	0.712762
Tnfaip2	R7	0.000237309	0.482151
Tgm31	R7	0.000289038	0.76458
Cldn73	R7	0.000424822	0.258821
Vmo12	R7	0.0011001	0.503393
Aqp3	R7	0.00121495	0.385033
Krt191	R7	0.00155844	0.74914
Cxcl171	R7	0.00351803	0.870341
Cryab1	R7	0.00427319	0.494197
Tstd11	R7	0.00478953	0.360321
Krt15	R7	0.00541245	0.981329
Selenop	R7	0.00719511	0.539464
Smim24	R7	0.0355012	0.773987
Elovl4	R7	0.0456547	0.914776
Prss16	R8	0	4.41534
Psmb11	R8	0	3.93882
Tbata	R8	0	3.75038
Ccl25	R8	0	3.71357
Ctsl1	R8	0	3.65745
Cxcl121	R8	0	3.41575
Cstb	R8	0	3.07495
Isg20	R8	1.17344e-302	3.31357
Krt181	R8	4.43597e-289	2.40881
Crip32	R8	3.06564e-264	2.59916
Ndrg3	R8	1.20466e-238	2.58143
Pithd1	R8	6.90355e-231	2.48659
Cd83	R8	1.48598e-216	2.46018
Fabp51	R8	1.07647e-215	1.8602
Pltp1	R8	2.25627e-215	2.3444
Tmem131l	R8	2.51723e-209	2.45664
Snhg11	R8	1.29032e-197	2.47034
Diras2	R8	1.46015e-192	1.77477
Fam213b	R8	1.00919e-183	2.17129
Ly75	R8	3.77941e-180	2.37447
Oma1	R8	6.07146e-179	2.41682
Kcnk2	R8	4.26062e-166	1.85072
Fxyd21	R8	1.08261e-162	2.98278
Slc22a71	R8	1.31521e-156	2.02877
Fth11	R8	7.14577e-145	1.52609
Myo5c	R8	1.94877e-144	0.758544
Cbr2	R8	1.8925e-143	2.17014
Dst1	R8	3.23179e-141	2.13864
Syngr1	R8	1.97633e-139	1.82302
S100a102	R8	7.47449e-137	1.68713
Rgcc	R8	6.437e-129	1.44846
Mmp2	R8	5.8079e-118	1.76753
Synm	R8	2.96058e-106	1.71655
Rnpepl1	R8	3.01795e-97	1.60992
Dusp28	R8	2.18347e-94	1.41984
Ankmy1	R8	4.60915e-92	0.872401
Igfbp7	R8	2.86117e-88	0.659329
Inmt	R8	3.75877e-84	1.67965
Npl	R8	7.58553e-81	0.379387
Plekhb1	R8	8.08111e-76	1.50691
Frmd6	R8	1.19532e-74	1.72681
Fasn	R8	2.39755e-72	1.79841
Riiad1	R8	4.51556e-70	0.712068
Cth	R8	1.06545e-54	0.846418
Ppp1r27	R8	1.34004e-53	1.36782
Gm424182	R8	1.56719e-47	1.24659
Ldhb1	R8	1.12469e-41	0.729221
Lpl	R8	8.89608e-40	0.717914
Pds5b	R8	5.19484e-39	1.79065
Mgll1	R8	2.05405e-28	0.713674
Gch1	R8	1.75661e-27	1.09637
Hpgd2	R8	1.01437e-22	0.72692
Selenbp1	R8	2.9642e-22	0.304174
Nudt19	R8	3.18919e-20	0.354664
Amn	R8	3.00421e-18	0.785642
Nefm	R8	4.94269e-16	0.800821
Nkx6-21	R8	1.32779e-12	0.421559
Hotairm1	R8	2.33316e-12	1.26014
Anxa22	R8	2.65905e-09	0.25562
Sparc1	R8	3.45957e-09	0.284
Tubb63	R8	4.79222e-09	0.548614
Tspan181	R8	3.58213e-08	0.280826
Sphk11	R8	2.43827e-07	0.472485
Acaa1b	R8	1.69192e-06	0.54254
Klf21	R8	2.09156e-05	0.449444
Fgf211	R9	5.88837e-176	2.15711
Tmem1582	R9	1.09868e-171	1.87958
Utf12	R9	8.17582e-170	1.74068
Phgdh2	R9	4.89705e-160	1.54899
Aire2	R9	6.15654e-159	1.49302
Hdc2	R9	7.07971e-136	1.47619
Calcb2	R9	7.60205e-129	1.41554
Olig1	R9	2.75319e-118	0.340075
Vim2	R9	1.37814e-105	1.09689
Srgn2	R9	5.53875e-102	0.847201
S100a32	R9	3.43374e-100	1.18482
Gm142752	R9	6.81569e-91	1.05214
Ccnd22	R9	5.93594e-87	1.18999
Hal2	R9	4.67407e-81	1.02281
Gm368992	R9	1.04863e-79	0.891632
Cadps2	R9	7.86877e-75	1.23157
Il4i12	R9	1.16308e-72	1.11393
Nsmce12	R9	2.1e-71	1.10806
Alox12e3	R9	5.84087e-70	0.994686
Tbc1d41	R9	8.85006e-70	0.985895
Ly6h1	R9	9.45171e-67	1.22239
Vmo13	R9	1.04224e-60	0.648912
Cd701	R9	1.64199e-60	0.47277
Fabp71	R9	3.3454e-59	0.319022
Crip33	R9	3.33394e-54	0.88514
Iglc32	R9	2.77157e-52	0.82562
Nkx6-22	R9	6.37564e-51	0.714681
Fabp52	R9	3.52439e-47	0.413252
Tfap2b1	R9	1.4028e-46	0.417632
Rprm1	R9	4.14432e-41	0.643629
Siglece1	R9	1.20026e-38	0.320586
Igkc1	R9	1.01553e-37	0.878044
Actb1	R9	5.3943e-37	0.689664
Thrsp1	R9	5.49638e-35	1.86502
Olfm41	R9	1.67663e-33	0.810545
Gm420312	R9	3.57372e-33	0.44677
Dlk11	R9	6.60551e-33	0.513151
Ctsh1	R9	1.49548e-31	0.563324
Pnmt	R9	5.6427e-30	0.279595
Chchd102	R9	8.1876e-25	0.402825
Crhbp1	R9	1.82037e-24	0.649309
Mt22	R9	7.38938e-24	0.738556
Il12a2	R9	2.56241e-21	0.29593
Cxcl103	R9	3.63273e-21	0.358561
Lgals32	R9	9.15425e-21	0.351794
Cyp26a1	R9	1.31917e-20	0.702766
Ltb1	R9	4.4164e-20	0.72069
Ran1	R9	6.26019e-18	0.321542
Nxpe32	R9	7.09764e-18	0.297981
Ooep3	R9	7.38405e-16	0.51926
Tnni11	R9	1.92997e-14	0.33607
Madcam11	R9	6.41423e-14	0.252719
Mfap51	R9	2.24748e-11	0.401048
Fndc71	R9	4.92627e-10	0.358014
Cryba23	R9	7.14374e-07	0.285505
Lyz22	R9	1.20217e-06	0.574214
CR974586.51	R9	0.000176874	0.320057
Gpx6	R9	0.00182079	0.548831
Lgals41	R10	4.30028e-201	3.28764
Lypd81	R10	1.91808e-199	4.0934
Muc13	R10	2.99684e-191	2.55621
AW1120102	R10	1.16009e-190	3.39725
2210407C18Rik1	R10	6.32336e-186	3.44746
Guca2a	R10	2.62537e-183	2.62269
Pigr1	R10	4.12592e-173	2.8521
2200002D01Rik1	R10	1.29044e-162	2.7571
Guca2b	R10	5.81005e-154	3.54616
Cldn74	R10	4.77791e-146	2.1373
Prap1	R10	1.56646e-141	3.63973
Slc51b	R10	1.02319e-138	1.52823
Clca4b	R10	2.94975e-137	0.527693
Ces2c2	R10	4.60691e-137	2.2264
Apoc3	R10	5.88297e-133	3.74663
Ahcyl23	R10	8.53449e-128	2.12704
Apob	R10	1.14883e-126	0.732243
AA4671973	R10	1.66346e-125	2.37348
Car8	R10	6.52782e-124	0.740976
Serpina1b	R10	3.50349e-117	0.836075
Apoa41	R10	5.86549e-115	3.4029
Gsta41	R10	1.94096e-114	2.16816
Dbi1	R10	7.36952e-114	2.07736
Gpa331	R10	1.23767e-113	1.74024
Reg3g1	R10	3.07791e-112	3.97066
C33	R10	1.09407e-105	2.13548
4732465J04Rik	R10	1.62389e-102	0.621755
Fmo3	R10	1.63582e-102	0.554705
Spink11	R10	1.62248e-100	3.68999
Fgf15	R10	3.55516e-100	0.287136
Atp1b12	R10	5.45971e-100	1.8641
Ubd2	R10	8.52586e-99	1.53168
Saa31	R10	4.40421e-94	4.15055
Timd21	R10	2.3749e-93	0.427168
Cdhr52	R10	4.46824e-93	1.82405
Tstd12	R10	1.03361e-90	2.77925
Gjb22	R10	4.97133e-89	1.96847
Nos21	R10	3.83534e-88	1.47762
Hpx	R10	3.14647e-86	0.559094
Crip12	R10	1.07028e-84	2.6291
Anxa101	R10	1.53731e-84	0.856442
Saa11	R10	1.29241e-82	3.93594
Oit11	R10	1.88061e-82	1.41007
Aldob1	R10	5.35815e-82	2.24006
Ebi32	R10	1.31567e-80	1.27213
Pck11	R10	4.60908e-80	0.865584
Prss30	R10	1.68112e-79	0.646457
Cldn33	R10	2.5138e-79	1.60569
Smim241	R10	1.97766e-78	1.81421
Phgr11	R10	1.42637e-77	1.42726
Pglyrp11	R10	4.29558e-77	1.81443
Lgals21	R10	1.12457e-76	1.87398
Serpinb1a3	R10	2.26727e-76	1.26663
Aqp31	R10	6.96105e-76	1.227
Nostrin2	R10	1.12394e-74	0.938961
Khdc1a	R10	2.41344e-74	1.52399
Rptn1	R10	1.01813e-73	0.860419
Cybb2	R10	2.3071e-73	1.1712
Slc39a4	R10	2.69705e-72	1.459
Cst61	R10	1.67509e-70	1.62827
Tm4sf20	R10	1.17329e-69	1.73061
Agr2	R10	6.41306e-68	0.669457
Aoc11	R10	5.04808e-67	1.82877
Bcl2a1b3	R10	1.15491e-66	1.21993
Dgat22	R10	4.28479e-66	1.4847
Ms4a10	R10	1.31969e-65	2.31902
Cdkn1a4	R10	5.11301e-65	1.40554
Ifi27l2b	R10	8.38214e-64	1.59657
Fabp92	R10	2.63033e-61	2.37855
Rbp2	R10	2.94269e-59	0.55002
Gsta11	R10	3.52985e-59	2.31557
Reg1	R10	6.50509e-59	2.47295
Gsta22	R10	8.99446e-59	1.80877
Krt841	R10	2.1198e-58	0.812223
Trf1	R10	7.19035e-58	2.20168
Nrp2	R10	6.83313e-57	0.822942
St3gal4	R10	8.4654e-57	1.06682
Cd523	R10	1.43297e-55	1.22681
Apobec2	R10	3.99265e-55	0.616525
Oas1f	R10	5.31143e-54	0.38108
S100g2	R10	9.41107e-54	2.41058
Serpinb92	R10	1.90915e-53	1.29482
Sis	R10	2.48458e-53	1.18627
Arg1	R10	6.4544e-52	0.296821
Tmem371	R10	8.29461e-50	1.53982
Ear11	R10	1.561e-49	0.252365
Spink41	R10	2.48517e-49	2.39902
Ces2e	R10	3.44511e-48	1.60434
2010109I03Rik1	R10	4.28099e-48	0.332623
Fabp42	R10	1.05382e-47	1.2125
Ttr	R10	1.92844e-47	3.78155
Lpl1	R10	1.21525e-46	0.761606
Ccl9	R10	1.51933e-46	1.69019
Tff31	R10	2.88116e-46	3.2471
Aqp8	R10	3.75852e-46	0.605782
Riiad11	R10	6.6892e-46	0.396943
Sat13	R10	1.10851e-45	1.3813
Ly6g6c1	R10	1.65219e-45	0.367777
Krt201	R10	1.68122e-44	1.09906
Cxcl23	R10	9.01131e-44	1.30807
Selenom3	R10	1.15278e-42	1.4787
Slurp11	R10	7.71529e-41	0.880425
Areg	R10	1.26479e-40	0.492403
Igf12	R10	9.7946e-40	1.76476
Glrx1	R10	3.99952e-39	1.05323
Orm11	R10	8.97664e-39	1.05899
Cib3	R10	1.40763e-38	0.395639
Hmox1	R10	9.3913e-38	0.52818
Sncg3	R10	4.28694e-37	1.32305
Clca1	R10	3.13926e-36	1.38741
Rarres21	R10	1.35581e-33	0.63566
Tspan12	R10	1.84612e-33	1.27657
Wfdc212	R10	3.64637e-33	1.112
44632	R10	1.95398e-32	0.62928
Ly6d2	R10	3.28851e-32	1.62122
Cyp2a51	R10	1.40297e-31	1.67691
Ccdc1841	R10	2.15761e-31	0.938057
Ctsh2	R10	3.04843e-31	0.82375
Plin2	R10	3.87818e-31	0.883287
Sftpd2	R10	4.7508e-31	1.61747
Apoa11	R10	2.43847e-30	2.76562
Fabp1	R10	3.64211e-30	2.0641
Srgn3	R10	1.66986e-29	0.680742
Spink51	R10	2.00829e-29	0.781401
S100a63	R10	6.31101e-29	1.41009
Cldn42	R10	7.17685e-29	0.975717
Alas12	R10	1.24448e-28	1.04779
Selenop1	R10	1.28976e-28	1.06208
Krt192	R10	1.43156e-28	1.38626
Krt151	R10	4.90513e-28	0.604259
Car121	R10	1.88122e-27	0.668982
Fabp21	R10	3.52046e-27	0.846443
Slamf9	R10	5.70841e-27	0.5003
Krt232	R10	1.09506e-26	0.283501
H1foo1	R10	1.50911e-26	0.26148
Gm420313	R10	2.8298e-26	0.721047
Ttc362	R10	8.65514e-26	1.25108
Spink121	R10	1.75974e-25	1.1903
Atp1a21	R10	3.45406e-25	0.419724
Fabp53	R10	4.95976e-25	0.937457
Cxcl51	R10	1.34133e-24	0.765313
Ly6a3	R10	1.60402e-24	1.01264
Chil12	R10	2.44467e-24	0.859972
Bpifa11	R10	6.02834e-24	0.611919
Bcl2a1d3	R10	1.10791e-23	0.885296
Ccl20	R10	1.18006e-23	1.67192
Asprv12	R10	1.83804e-23	1.8401
Plet12	R10	6.15462e-23	0.912885
Tnmd2	R10	6.34295e-23	0.386124
Hsd17b6	R10	8.16635e-23	1.36705
Sbpl	R10	1.58435e-22	0.6586
Tgm2	R10	2.43769e-22	1.52421
Serpinb22	R10	2.56402e-22	1.31293
Pdzk1ip11	R10	3.14556e-22	0.438877
Clu3	R10	1.01283e-21	0.784698
Smtnl11	R10	1.14118e-21	1.32272
Cdkn2a1	R10	1.67032e-21	1.30744
Nupr13	R10	1.73835e-21	1.10475
Serping11	R10	6.7966e-21	0.491003
Ptgs21	R10	6.83799e-21	1.13211
Klk1b161	R10	4.11369e-20	0.358803
H2-M22	R10	4.51004e-20	0.817286
Pla2g2e1	R10	1.00766e-19	0.591902
Tubb4b2	R10	1.11461e-19	0.60314
Car41	R10	1.16376e-19	0.533718
Ccl221	R10	1.66421e-19	0.645328
Wfdc22	R10	2.23224e-19	0.912203
Edn1	R10	7.5498e-19	0.287382
Fgfbp11	R10	1.26698e-18	0.383335
Plac81	R10	3.37919e-18	0.773516
Gm28347	R10	1.90369e-17	0.61091
Gsto11	R10	2.07755e-17	0.317207
Gsdma1	R10	2.89974e-17	0.323837
Akr1c19	R10	1.49084e-16	0.393137
1110008L16Rik2	R10	5.69277e-16	1.01475
Penk1	R10	1.2289e-15	0.489517
Scgb1c12	R10	1.3582e-15	0.320321
Defb63	R10	5.41469e-15	0.371082
Rnase11	R10	5.59568e-15	0.353448
Zg161	R10	6.35806e-15	1.14277
Gm476621	R10	3.20431e-14	0.283733
Tspan82	R10	4.06993e-14	1.22318
Rgs1	R10	7.98826e-14	0.30003
Ptgds3	R10	3.65389e-13	0.442954
Il1f61	R10	6.90108e-13	0.469912
Lypd23	R10	7.78489e-13	1.28695
Adh6a	R10	1.60312e-12	0.311926
Defb191	R10	2.30757e-12	0.295461
Iapp1	R10	6.38278e-12	1.22447
Dmbt1	R10	6.43207e-12	0.349571
Fam84a1	R10	8.54627e-12	0.53027
H2-Q103	R10	4.26018e-11	0.758375
Mmp23	R10	5.28419e-11	0.489758
Lyz12	R10	5.88899e-11	1.53758
Camp	R10	6.00654e-11	0.938023
Bglap31	R10	8.70236e-11	1.52344
Wfdc171	R10	1.006e-10	1.20472
Cdo1	R10	1.4346e-10	0.725188
Fxyd32	R10	3.04971e-10	0.346303
Hbegf1	R10	3.14148e-10	0.334427
Rasd12	R10	5.21832e-10	0.321296
Defa242	R10	6.7366e-10	0.926651
Fth12	R10	2.9092e-09	0.434756
Clic31	R10	3.32617e-09	0.306543
Npy	R10	7.61325e-09	0.643126
Ccl7	R10	3.792e-08	0.455985
Gc1	R10	4.1028e-08	0.774564
Ceacam10	R10	1.30701e-07	0.340433
Gpx21	R10	2.66417e-07	0.555492
Ccl53	R10	2.99542e-07	1.27401
Chil4	R10	3.1079e-07	0.583147
Oxt1	R10	3.65975e-07	0.783119
Cited22	R10	3.66765e-07	0.502213
Saa21	R10	4.36734e-07	1.27759
Msln2	R10	5.51392e-07	0.51418
Uts2b	R10	1.58523e-06	0.505226
Prss221	R10	2.97623e-06	0.479276
4930579C12Rik1	R10	4.22507e-06	0.43073
Tnfrsf11b1	R10	5.69265e-06	0.446616
Bcl2a1a2	R10	8.59831e-06	0.654132
Cfap53	R10	8.92759e-06	0.419452
Cdkn1c3	R10	7.94733e-05	1.5993
Ces2a	R10	0.000202454	1.58967
Ctsc1	R10	0.000399663	0.469733
Skint92	R10	0.000665686	0.796631
Bcl2l141	R10	0.00100468	0.291473
Lcn21	R10	0.00133676	1.2998
Ly6i2	R10	0.00549625	1.25531
Chchd103	R10	0.0152782	0.447519
Myl72	R10	0.0243991	0.82887
Resp182	R10	0.0332497	0.515426
Cd8a	R11	0	2.04504
Rag1	R11	0	2.04346
Rhoh	R11	0	1.53272
Sh2d1a	R11	0	1.3975
Themis	R11	0	0.894262
Cd8b1	R11	4.25369e-291	2.34392
Dntt	R11	1.8292e-286	1.69422
Ptprcap	R11	5.84522e-281	1.75271
Cd3e	R11	7.59825e-280	1.7417
Trbc1	R11	6.1922e-278	2.89988
Lat	R11	1.245e-277	2.01589
Trbc2	R11	1.12662e-267	3.12602
Psmb111	R11	3.62553e-263	2.81424
Cd3g	R11	6.21352e-262	1.81403
Endou	R11	3.04053e-259	1.31146
Ccr9	R11	2.95254e-254	1.51375
Thy1	R11	3.92796e-251	1.99017
Prss161	R11	7.30315e-249	3.1058
Cd3d	R11	8.14388e-249	1.97087
Lck	R11	1.18762e-247	2.14737
Pithd11	R11	2.09619e-240	2.37481
Satb1	R11	1.63629e-237	2.22874
Ccl251	R11	1.24805e-235	3.10198
Cxcl122	R11	1.46781e-232	2.33632
Cd831	R11	6.19764e-230	1.94593
Isg201	R11	6.78788e-230	2.5049
Tcf7	R11	1.45916e-225	1.87247
Gmfg	R11	1.70452e-224	1.88382
Tbata1	R11	9.76136e-221	2.84544
Tmem131l1	R11	7.61648e-220	1.91849
Sla	R11	1.55595e-219	0.932296
Ndrg31	R11	9.63196e-218	2.01236
Fasn1	R11	1.20276e-215	2.07138
Ly751	R11	2.52643e-213	1.76584
Diras21	R11	8.68693e-211	1.29527
Cstb1	R11	4.49059e-204	2.40286
Rgcc1	R11	1.0031e-203	1.75593
Cd247	R11	9.10836e-202	1.19086
Ramp1	R11	2.99388e-199	1.6606
Plekhb11	R11	1.23357e-198	1.40213
Snhg111	R11	3.16567e-191	1.91634
Fxyd22	R11	6.25946e-191	2.5248
Dgkeos	R11	3.92624e-190	1.18474
Kcnk21	R11	5.41345e-190	1.39315
Mmp21	R11	2.09238e-189	1.52097
Aqp11	R11	1.30753e-186	1.26463
Arpp21	R11	7.92684e-186	1.27596
Cd4	R11	9.45893e-185	1.36024
Crip34	R11	1.58418e-183	1.94421
Dst2	R11	4.84201e-182	1.80021
Ctsl2	R11	1.82887e-178	2.15158
Oma11	R11	1.17122e-176	1.82372
Bcl11b	R11	4.59555e-169	1.5605
Ighm	R11	1.12576e-166	1.15241
Ptprc	R11	1.69289e-163	1.0984
Hdac7	R11	1.74799e-162	1.31633
Rmnd5a	R11	3.15879e-160	1.34066
Syngr11	R11	7.67779e-160	1.28153
Ccnd3	R11	3.41486e-159	1.67622
Synm1	R11	3.19569e-158	1.24795
Coro1a	R11	4.07176e-158	1.54794
Arhgap45	R11	2.91614e-150	1.3545
Slc22a72	R11	3.48031e-146	1.37953
Cd28	R11	8.08944e-145	0.87844
Pltp2	R11	3.68982e-143	1.42737
Fam213b1	R11	1.8464e-142	1.67395
Dusp281	R11	3.51503e-142	1.25788
Chrna9	R11	3.17536e-141	0.859948
Skap1	R11	9.48055e-141	1.12457
Rnpepl11	R11	4.70386e-139	1.54234
Ets1	R11	5.93233e-139	1.2092
Myb	R11	4.52052e-132	1.13003
Cd27	R11	1.20477e-130	1.19031
Fth13	R11	5.12413e-128	1.32695
Krt182	R11	5.73309e-127	1.45959
Hotairm11	R11	7.70759e-124	1.27619
Hist1h2ap1	R11	1.416e-123	1.47463
Hist3h2ba	R11	6.2479e-122	0.987453
Myo5c1	R11	1.85681e-117	0.902861
Lef1	R11	8.79882e-115	1.03171
Txk	R11	9.19006e-112	0.827689
Trac	R11	1.26014e-101	1.04646
Arl5c	R11	1.50002e-101	0.945748
S100a103	R11	4.69286e-101	1.32312
Cbr21	R11	9.69444e-101	1.383
Gm525	R11	1.2626e-100	0.547966
Selplg	R11	3.30948e-98	0.95276
Gch11	R11	2.39886e-96	0.97245
Inmt1	R11	1.06474e-94	0.741631
Fyb1	R11	1.81007e-90	0.530741
H2afv2	R11	6.8116e-90	1.29714
Acap1	R11	1.14704e-88	0.503318
Mns11	R11	2.50594e-84	0.742943
Ldhb2	R11	1.08055e-82	0.841681
Gngt2	R11	5.6909e-80	0.50812
Gzma	R11	3.958e-79	0.466825
Stmn11	R11	5.49613e-78	1.40019
Birc51	R11	1.07773e-77	1.07816
Rasgrp2	R11	6.79889e-76	0.637142
Ptpn181	R11	2.93044e-73	0.350795
Top2a1	R11	4.05854e-73	0.991497
Ccnb21	R11	4.26348e-71	0.812685
Ccna21	R11	1.16477e-70	0.354371
Pds5b1	R11	2.38409e-70	1.12807
Lpl2	R11	3.62676e-67	0.563919
Hmgb21	R11	1.10917e-65	1.44642
Fabp54	R11	1.95984e-64	0.78171
Hist1h1e1	R11	2.55268e-63	0.724803
Tuba1b1	R11	1.14287e-61	0.792173
Hist1h1b1	R11	3.59102e-60	0.546557
Pclaf1	R11	1.50486e-59	0.887497
Ube2s1	R11	1.08322e-58	0.938552
Ube2c1	R11	1.54007e-58	1.04523
Lockd1	R11	1.59206e-57	1.03706
Ankmy11	R11	1.0357e-56	0.749002
Cks21	R11	4.48673e-56	0.625892
Pecam1	R11	5.54666e-55	0.283588
Cenpa1	R11	6.32848e-55	0.916687
Hist1h2ae1	R11	6.19787e-54	0.791995
Tubb51	R11	8.86582e-54	0.760098
Prc11	R11	2.2024e-51	0.426622
Amn1	R11	3.62043e-51	0.73361
Tubb4b3	R11	7.50938e-51	0.451088
Nusap11	R11	2.82587e-49	0.514005
Cdca81	R11	4.98559e-47	0.546329
Tspan182	R11	5.31026e-47	0.286916
Lgals14	R11	5.23774e-45	0.415365
Tyms1	R11	1.45828e-44	0.480317
Cenpf1	R11	5.29207e-44	0.561596
Frmd61	R11	1.0273e-41	0.469545
Anxa23	R11	4.54071e-41	0.325335
Ppp1r271	R11	4.9061e-41	0.807809
H2afx1	R11	5.16783e-40	0.742341
Hmgn21	R11	6.51911e-38	0.693768
Cdc201	R11	1.1481e-35	0.412971
Ccnb11	R11	1.92632e-33	0.291966
Cdca31	R11	3.8622e-33	0.5602
Spc241	R11	3.3021e-32	0.629307
Nefm1	R11	1.05627e-30	0.457824
Ran2	R11	2.33914e-27	0.425224
Dut1	R11	5.85676e-27	0.64522
H2afz1	R11	9.40525e-23	0.47774
Ly6k1	R11	1.00416e-20	0.327831
Akr1b3	R11	5.42481e-19	0.316091
Rrm21	R11	4.34985e-18	0.582785
Cks1b1	R11	1.21028e-17	0.339839
Tesc2	R11	6.26758e-13	0.495033
Cth1	R11	2.37307e-10	0.355071
Itm2a	R11	8.75975e-08	0.423219
Dcn1	R12	1.19486e-132	2.74436
Sparc2	R12	6.92982e-129	2.26016
Igfbp71	R12	4.66261e-114	2.12693
Myl92	R12	5.3836e-114	2.30434
Gas12	R12	7.26553e-104	1.99297
Apoe2	R12	2.79775e-103	1.6519
Mgp2	R12	4.84954e-98	1.59636
Pltp3	R12	1.31322e-95	1.84225
Cxcl123	R12	4.20906e-95	1.6166
Mgll2	R12	5.11439e-92	1.41778
Gng11	R12	4.36575e-75	0.509976
Tagln3	R12	9.17692e-67	1.6794
Fst2	R12	4.10937e-51	0.671904
S100a104	R12	8.65762e-51	0.888997
Gstt11	R12	4.17804e-48	0.484693
Frmd62	R12	1.10713e-43	1.41817
Mylpf2	R12	1.18374e-42	0.399306
Snhg181	R12	5.8887e-42	1.04039
Klf22	R12	1.46174e-41	1.36649
Ctsl3	R12	5.61045e-34	0.292308
Kcnk22	R12	4.1094e-33	1.29816
Wnt61	R12	2.20249e-32	0.454424
Ccnd23	R12	9.44033e-31	0.869652
Atf31	R12	3.42221e-28	1.04097
Isg152	R12	2.84885e-27	0.88501
Snhg112	R12	6.59249e-27	0.782744
Cbr22	R12	8.26759e-26	0.519547
Ly6a4	R12	5.05849e-25	0.601606
Fxyd33	R12	6.37592e-24	0.44147
Igfbp53	R12	1.34801e-21	1.15859
Aldh21	R12	2.22615e-19	0.583906
Fos5	R12	4.23552e-18	1.19341
Phlda11	R12	8.3537e-18	0.798044
Col3a1	R12	1.03035e-17	0.756927
Socs33	R12	3.20163e-16	1.11132
Bambi	R12	1.42242e-14	0.250108
Ifit32	R12	2.0781e-14	0.517604
Igfbp3	R12	4.73176e-14	0.796092
Cyr612	R12	4.74904e-14	1.09
Igfbp21	R12	1.23491e-11	1.48882
Gpha2	R12	9.8216e-09	0.62899
Syngr12	R12	3.65557e-05	0.389726
Col1a2	R12	4.00796e-05	0.369498
G0s21	R12	9.97748e-05	0.922165
Ptn1	R12	0.00200132	1.11954
Bgn	R12	0.0377844	0.415124
Il33	R12	0.0484339	0.908695
Ccl91	R13	2.22928e-213	4.07178
Ccl6	R13	4.79135e-195	4.65886
Ccl201	R13	2.11149e-192	5.18017
Gm37800	R13	1.614e-191	2.81407
Serpinb6a	R13	5.65819e-173	4.83708
Serpina1b1	R13	2.48139e-172	0.500445
Fabp11	R13	2.47977e-163	4.16308
Pglyrp12	R13	5.01616e-157	4.95294
Serpinb1a4	R13	4.32602e-155	3.58032
Gm5485	R13	6.9551e-153	0.773337
Bcl2a1b4	R13	5.66639e-148	2.86595
Ctsh3	R13	9.35887e-144	2.56249
AW1120103	R13	3.28085e-139	2.71557
2200002D01Rik2	R13	1.12561e-138	2.94394
Cyp2a52	R13	2.57219e-136	3.11043
Clu4	R13	2.95361e-134	2.56637
Tnfaip22	R13	1.13018e-123	2.7083
Gjb23	R13	1.19352e-123	2.61823
Gp21	R13	6.3292e-118	4.58554
Atp1b13	R13	9.41207e-117	2.20248
Krt202	R13	1.1987e-116	2.344
Bcl2a1d4	R13	1.62272e-111	2.5367
Bcl2a1a3	R13	3.30685e-110	2.57954
Crip13	R13	9.57944e-106	2.49227
Hamp1	R13	2.72025e-103	3.29898
Mmp72	R13	1.99416e-101	2.01463
Wfdc172	R13	3.39448e-99	4.04928
H2-M23	R13	3.17597e-95	2.40585
1700049E15Rik	R13	2.63199e-94	0.66533
Msln3	R13	5.79944e-93	2.67186
Csn22	R13	4.35105e-89	2.11378
Nostrin3	R13	3.61555e-88	2.03441
Gm31219	R13	1.3591e-87	0.669603
Csn3	R13	2.57786e-87	1.65401
Fabp43	R13	9.58298e-86	2.80913
Fabp55	R13	3.30259e-85	1.78974
Rnase12	R13	1.38646e-81	3.42972
Fbp2	R13	2.69988e-81	1.1472
Fabp22	R13	6.03127e-77	1.88173
Gm38335	R13	9.10413e-74	1.13848
Prg21	R13	6.17242e-73	3.29856
Clca4b1	R13	9.77819e-72	0.325566
Reg3g2	R13	1.11235e-71	2.53686
AA4671974	R13	2.7464e-71	1.74817
Mmp231	R13	5.19437e-71	1.75827
1700016F12Rik	R13	2.29606e-70	1.37097
Gm5930	R13	2.73108e-67	1.66135
Fth14	R13	2.50269e-66	1.18931
Tnfrsf11b2	R13	1.73316e-65	2.36848
Lgals42	R13	2.50646e-65	1.88332
Ahcyl24	R13	3.64887e-65	1.48046
Ubd3	R13	5.15606e-64	1.10737
Spink42	R13	1.76782e-63	2.81079
Sox8	R13	1.61766e-62	1.61709
Lyz13	R13	2.59911e-62	3.64488
Cdhr53	R13	2.17543e-61	1.38276
Cfp	R13	7.31118e-58	1.24705
Apoa42	R13	3.78035e-57	2.6534
Gpa332	R13	2.47735e-56	1.39704
Ncf12	R13	5.86661e-56	1.50967
Wfdc183	R13	1.24335e-55	3.45616
Cldn75	R13	1.95197e-55	1.49408
Oas1f1	R13	3.1411e-54	0.602396
Serpinb93	R13	3.29193e-50	1.5009
Muc131	R13	7.11258e-49	1.40832
Dnase1	R13	1.79044e-47	0.638371
Dmbt11	R13	1.7974e-47	0.63107
Gucy1b2	R13	1.04641e-46	3.58146
Lypd82	R13	3.60099e-45	1.30659
Hepacam22	R13	8.8237e-43	1.99468
Aoc12	R13	1.83518e-42	0.947399
Spink52	R13	5.88563e-41	0.737478
Fyb2	R13	1.8374e-39	1.09815
Fxyd34	R13	1.25362e-38	1.77188
Skint93	R13	1.29355e-38	1.18056
Cdkn1c4	R13	3.644e-38	1.02482
Rps6kl11	R13	1.70812e-37	1.44154
Cdkn1a5	R13	3.89727e-37	1.62888
Timd22	R13	4.05183e-37	0.529814
St3gal41	R13	7.47159e-36	0.345246
Dbi2	R13	3.42707e-35	1.51828
Actb2	R13	1.74652e-33	1.02499
Trf2	R13	4.25044e-33	1.28507
Sprr1a2	R13	4.30736e-33	1.57938
Igf13	R13	1.00316e-32	1.43572
Ccr5	R13	1.39624e-32	1.43796
Selenom4	R13	3.32589e-32	1.31668
Apoc31	R13	4.55901e-31	2.19117
Ces2e1	R13	2.14709e-30	0.528212
Apoa12	R13	6.31127e-30	2.18735
Gm476622	R13	6.50691e-30	0.287371
Napsa1	R13	2.7408e-29	0.963946
Serpina71	R13	4.6628e-29	0.275772
Prap11	R13	2.43457e-28	1.74037
Cldn43	R13	1.15714e-27	1.19884
Cldn34	R13	4.23169e-27	1.20953
Lpl3	R13	4.46995e-25	0.525173
Ccr71	R13	5.46675e-25	1.53932
Ccdc1842	R13	1.97453e-24	1.02209
Alas13	R13	4.09797e-24	0.576531
Muc31	R13	6.95057e-23	0.672838
Khdc1a1	R13	2.11453e-22	1.27138
Ctrb12	R13	2.86713e-21	0.456054
Cryab2	R13	1.16365e-20	0.898632
Aif1	R13	2.30358e-20	1.76963
Asprv13	R13	5.09073e-20	0.733243
Cldn132	R13	1.73909e-19	1.21045
Prss21	R13	9.524e-17	1.33091
Thbs1	R13	1.05076e-16	1.6389
Bglap32	R13	4.40364e-16	1.79262
Plin21	R13	7.83309e-16	0.500631
Lyz23	R13	4.09928e-15	0.903854
Col15a1	R13	1.01537e-14	0.251232
Sncg4	R13	1.11724e-14	1.94316
Gm2a1	R13	1.5364e-14	0.714101
Slc39a41	R13	4.19232e-13	0.458875
Eci3	R13	1.67643e-12	0.541385
Tnmd3	R13	5.39296e-12	0.598398
Acsbg1	R13	6.14889e-12	0.3053
Car21	R13	7.21363e-12	0.550808
Iapp2	R13	1.91839e-11	2.07606
H2afv3	R13	2.2059e-11	0.60629
Ly6i3	R13	3.33451e-11	1.29715
1700029F12Rik2	R13	7.40795e-11	0.435445
S100a105	R13	1.46107e-10	0.773432
Ly6a5	R13	5.6027e-10	0.608194
Tspan83	R13	9.85683e-10	0.828749
Ckb	R13	1.26924e-09	1.36984
Rptn2	R13	3.50491e-08	0.267801
Tmem372	R13	5.28882e-08	0.779366
Il1b	R13	8.42407e-07	0.345796
Tstd13	R13	1.07464e-06	1.60266
Guca2b1	R13	2.03882e-06	2.47179
Il4i13	R13	2.88843e-06	0.840476
Nsmce13	R13	4.3111e-05	0.521178
Glrx2	R13	6.5275e-05	0.571354
Bcl2l142	R13	0.000105536	0.316095
Gm420314	R13	0.000204861	0.476415
Ccl222	R13	0.00030002	0.590204
Lypd24	R13	0.00179227	0.283996
Uts2b1	R13	0.00284284	1.33356
Ces1d2	R13	0.00553657	0.287215
Umod	R13	0.0107979	0.494396
4930579C12Rik2	R13	0.017301	0.593911
Lgals22	R13	0.0336564	1.19748
Sh2d1a1	R14	4.82995e-273	2.46315
Rhoh1	R14	9.58944e-242	2.99936
Cd8a1	R14	2.72084e-241	3.51539
Gm5251	R14	3.27057e-238	1.18615
Lat1	R14	2.9782e-232	3.36872
Cd3g1	R14	1.98924e-223	3.41638
Themis1	R14	4.40245e-223	2.01986
Cd8b11	R14	7.73724e-220	3.99781
Trbc21	R14	1.29984e-219	4.9598
Thy11	R14	2.59221e-211	3.47359
Dntt1	R14	1.4809e-209	3.20225
Ptprcap1	R14	5.5524e-208	2.8255
Tcf71	R14	3.83393e-205	3.59089
Rag11	R14	3.24064e-199	3.01054
Skap11	R14	1.81189e-198	2.17239
Dgkeos1	R14	4.78323e-194	2.34619
Cd3d1	R14	1.83547e-193	3.66972
Satb11	R14	1.76188e-191	3.66082
Selplg1	R14	4.80388e-191	2.06968
Ramp11	R14	7.1124e-191	2.93958
Trbc11	R14	4.9993e-184	4.56748
Aqp111	R14	3.00919e-173	2.55725
Gmfg1	R14	3.80639e-171	3.47614
Lck1	R14	2.58826e-160	3.43808
Cd3e1	R14	7.8008e-148	2.75486
Ccnd31	R14	1.16116e-140	2.9086
Hist1h1b2	R14	3.78971e-135	1.51175
Rmnd5a1	R14	5.37824e-131	2.51314
Ccr91	R14	1.74089e-130	2.87359
Acap11	R14	3.11455e-130	1.20095
Gzma1	R14	5.26974e-130	0.96582
Ighm1	R14	1.20191e-120	1.89871
Gngt21	R14	9.8693e-116	1.32828
Arl5c1	R14	8.93198e-110	2.19785
Ccnb12	R14	1.86483e-108	0.75928
Endou1	R14	2.27985e-108	2.367
Ccna22	R14	1.1595e-105	0.946869
Ccnb22	R14	2.60286e-105	1.39487
Rgcc2	R14	2.57004e-101	1.88471
Sla1	R14	5.11714e-101	1.782
Rrm22	R14	2.12849e-97	1.58046
Stmn12	R14	2.13975e-95	2.39274
Ube2c2	R14	6.24226e-94	1.87917
Hdac71	R14	2.85785e-93	2.06623
Bcl11b1	R14	1.63941e-91	2.62301
Fyb3	R14	1.08936e-90	1.76658
Myb1	R14	2.14965e-90	2.11419
Coro1a1	R14	5.16003e-90	2.53439
Lockd2	R14	2.51217e-89	1.5158
Mns12	R14	7.48981e-86	1.50844
Chrna91	R14	3.08994e-84	1.37905
Trac1	R14	1.60949e-81	2.3705
Ptpn182	R14	3.05374e-79	1.37095
Cd281	R14	1.0136e-77	2.27795
Cenpf2	R14	8.828e-77	1.2252
Hist3h2ba1	R14	4.90998e-76	1.62719
Cdca32	R14	7.29276e-75	1.1221
Cdc202	R14	8.81582e-72	1.06276
Arpp211	R14	8.19575e-71	2.4824
Ptprc1	R14	1.23177e-70	1.99932
Ly6d3	R14	4.38832e-69	1.41031
Cenpa2	R14	6.54066e-68	1.45847
Spc242	R14	7.55932e-66	1.08638
Lrmp1	R14	8.68979e-62	0.337385
H2afv4	R14	9.41402e-61	1.84135
Itm2a1	R14	2.99277e-60	1.66444
Akr1b31	R14	6.16495e-60	1.32668
Tubb52	R14	8.67783e-60	1.74322
Lgals15	R14	6.13276e-57	1.42669
Ube2s2	R14	1.18428e-55	1.61259
Arhgap451	R14	5.99806e-52	2.18431
Nusap12	R14	3.94408e-51	1.33112
Birc52	R14	7.231e-49	1.68602
Mylpf3	R14	7.36718e-48	0.256821
Hmgn23	R14	4.66131e-47	1.60558
Lef11	R14	1.20865e-46	1.93344
Hmgb22	R14	2.60628e-45	2.51936
Dut2	R14	1.33743e-42	1.34515
Ltb2	R14	1.42898e-42	1.26422
Cd41	R14	2.58151e-40	1.82687
Cks1b2	R14	6.43542e-40	1.07489
Hist1h2ae2	R14	9.71026e-40	1.60822
Hist1h2ap2	R14	1.554e-38	2.32878
Cd271	R14	6.9616e-36	1.90767
Cd2471	R14	2.62066e-34	1.97658
Cdk11	R14	2.3065e-33	0.838142
Pclaf2	R14	4.60897e-32	1.62691
Pecam11	R14	9.79947e-32	0.533965
H2afz2	R14	1.89125e-29	1.14717
Ets11	R14	4.72034e-29	2.02003
Prc12	R14	8.15393e-29	0.587674
Ldhb4	R14	1.30249e-27	1.14293
Ms4a4b	R14	7.79063e-25	0.394837
H2afx2	R14	7.04595e-24	1.37134
Myl101	R14	8.75336e-24	0.765311
Dnajc71	R14	2.08867e-23	0.776773
Rgs22	R14	3.75974e-22	0.609948
Cd24a2	R14	3.73359e-21	0.61903
Tyms2	R14	6.51985e-21	1.14616
Tuba1b2	R14	2.81831e-19	1.4506
Cks22	R14	6.5291e-18	1.36332
Ly6k2	R14	2.15848e-17	0.633382
Plin22	R14	2.1513e-15	0.314502
Clasrp	R14	5.99227e-14	0.254944
Ran3	R14	1.93391e-13	0.810198
Hist1h1e2	R14	7.56939e-10	1.27182
Txk1	R14	3.89061e-09	1.29811
Olfr1369-ps1	R14	4.06608e-09	0.255517
Cdca82	R14	4.94693e-09	0.858111
Top2a2	R14	5.14818e-09	1.6744
Hsp90aa12	R14	3.1284e-08	0.511091
Selenop2	R14	0.000261281	0.261007
Actb3	R14	0.00372836	0.278277
Car81	R15	3.41199e-97	3.63032
Cpn1	R15	1.94553e-54	1.77767
Actl6b	R15	1.16784e-51	0.295611
Speer4c	R15	4.79761e-51	3.33936
Fam183b	R15	1.16705e-48	2.54175
Scg2	R15	5.56762e-48	2.66156
Serpina1b2	R15	2.35345e-44	0.493352
Clca3b	R15	1.53625e-36	3.76991
Rbp41	R15	1.17277e-34	2.6985
Cd177	R15	5.41024e-27	3.49366
Ttc363	R15	2.55555e-20	1.72467
Oit12	R15	3.65718e-19	1.76188
Chgb	R15	4.62029e-19	3.33434
Ceacam101	R15	2.17751e-17	2.87658
2210407C18Rik2	R15	6.7421e-16	2.33321
Iapp3	R15	1.89401e-15	3.67972
Clca11	R15	3.60996e-15	1.60406
Serpina3j1	R15	1.28381e-14	1.45853
Tspan13	R15	1.31995e-14	2.19647
A2ml1	R15	9.7663e-14	0.520516
Cryba24	R15	2.78025e-13	1.36593
Resp183	R15	2.84072e-13	2.90308
Cib32	R15	4.63894e-13	1.82752
Etv11	R15	4.83009e-13	1.25301
Atp1b14	R15	7.37785e-13	1.62933
Capn9	R15	1.34492e-12	0.417997
Clps1	R15	1.65121e-12	4.27486
Selenop3	R15	6.0839e-12	1.47768
Arg11	R15	9.31024e-12	0.654472
Iglc33	R15	1.70305e-11	2.42333
Riiad12	R15	2.28512e-11	1.08392
AW1120104	R15	4.02248e-11	1.84052
Gng4	R15	5.75595e-11	0.29884
Fmo2	R15	7.00557e-11	0.912187
Klk1b4	R15	8.99138e-11	1.27873
Ambp	R15	9.72483e-11	1.30629
Gsdma3	R15	2.1779e-10	0.719672
Iglc1	R15	3.3166e-10	0.621333
Cfap126	R15	1.5275e-09	0.672282
Gabrd	R15	1.93635e-09	0.270316
Atp2a31	R15	1.99294e-09	1.30493
Gpa333	R15	1.26638e-08	0.772578
Muc132	R15	1.31091e-08	0.520029
Fhl1	R15	1.18648e-07	0.412349
Igfbp54	R15	1.44648e-07	2.09758
Klk1b162	R15	2.05515e-07	0.399803
Hepacam23	R15	7.17103e-07	1.62376
Cldn76	R15	7.22596e-07	1.05186
Tff12	R15	1.11386e-06	1.06262
8430408G22Rik1	R15	1.20344e-06	0.77629
Selenom5	R15	1.21556e-06	1.12491
Ighm2	R15	2.22797e-06	0.393558
Nr1h3	R15	3.73092e-06	0.300797
Angptl8	R15	4.71912e-06	0.254236
Plac82	R15	7.2327e-06	0.901554
Itln12	R15	9.70259e-06	3.09678
Gcg1	R15	1.15253e-05	2.12533
Sbpl1	R15	1.76565e-05	0.630753
Chil41	R15	1.862e-05	0.455604
Atf32	R15	2.07606e-05	1.67457
Wfdc23	R15	2.59232e-05	1.15754
Cdhr54	R15	3.59176e-05	1.10511
Lgals43	R15	6.67511e-05	1.19447
Stxbp5l	R15	6.80142e-05	1.9836
Pcsk1n	R15	0.000109397	1.35415
Ppy1	R15	0.000183397	0.5428
Krt193	R15	0.000232958	1.64953
Phgr12	R15	0.000244267	0.581254
Cited23	R15	0.000360453	0.813457
Rgs42	R15	0.000688074	0.253425
Pglyrp13	R15	0.0012276	0.507711
Lgals23	R15	0.0013532	0.703042
Chchd104	R15	0.00140897	1.02595
Gstt13	R15	0.00142953	0.568993
Zp21	R15	0.00250292	0.306747
Rasd14	R15	0.00299967	1.33041
Plet13	R15	0.00396423	1.01672
Klf23	R15	0.00450504	0.492603
Cd24a3	R15	0.00929156	1.38292
Lipc2	R15	0.0145679	1.32351
Gp22	R15	0.0156612	1.61049
Ptgds4	R15	0.0183362	0.557264
Snhg113	R15	0.0241629	0.392306
Cdo11	R15	0.0244285	1.61768
Chga1	R15	0.0293957	2.22749
Sct4	R15	0.0353961	0.472708
Isg202	R15	0.0435418	0.329733
Sntn	R16	0	1.88212
1700019G24Rik	R16	9.5246e-222	0.597427
Dynlrb2	R16	9.65598e-222	3.8473
1700001C02Rik	R16	6.92766e-170	1.87882
Fam183b1	R16	3.17698e-148	3.82221
Zmynd10	R16	1.5007e-144	2.01029
Tmem212	R16	6.71316e-141	2.58181
Tekt1	R16	3.0516e-139	2.1955
Gm867	R16	7.24292e-126	1.64322
Gm19935	R16	1.49252e-123	2.65695
Deup1	R16	1.12391e-121	1.78956
Dnali1	R16	3.77668e-119	2.00057
Vpreb3	R16	1.18744e-104	3.126
4833427G06Rik	R16	6.47185e-96	2.18339
Dnajb13	R16	3.53777e-93	1.13933
Erich2	R16	1.17434e-88	1.7089
1700001L19Rik	R16	2.75214e-85	1.90073
Meig1	R16	7.73989e-84	3.41304
Tctex1d4	R16	2.13521e-83	1.34531
1110017D15Rik	R16	8.52703e-83	3.06754
BC051019	R16	2.27552e-79	1.59791
Ccdc153	R16	4.14585e-79	3.32761
Lrrc23	R16	3.29471e-73	3.23163
Ncan	R16	5.63954e-70	0.501799
Foxj1	R16	1.19818e-65	2.92706
Efcab10	R16	5.23767e-63	1.38554
Tppp31	R16	9.374e-63	4.53219
1700016K19Rik	R16	3.83638e-62	3.201
1700012B09Rik	R16	1.55064e-59	1.40126
Kcnrg	R16	9.79189e-58	1.27663
Riiad13	R16	1.20794e-55	2.98933
Cfap1261	R16	5.10573e-53	2.52625
Pi16	R16	3.42133e-52	0.710161
Mlf1	R16	1.56167e-51	2.16256
1700028P14Rik	R16	3.73914e-48	0.535972
Nme5	R16	7.86756e-48	2.13899
1700024G13Rik	R16	1.75944e-47	1.18004
Rsph11	R16	8.35214e-47	2.50118
Cfap70	R16	1.61446e-46	1.28911
Tmem1071	R16	4.5264e-46	3.3077
4933434E20Rik	R16	1.18196e-43	2.74853
Chchd105	R16	1.73925e-41	2.90651
A2ml11	R16	3.95099e-41	1.29406
Spata33	R16	7.10365e-40	1.84788
Armc3	R16	1.6191e-39	0.359196
Mcidas	R16	3.89559e-39	0.965198
Cd24a4	R16	1.60826e-38	2.39125
Tubb4b5	R16	2.23203e-38	2.79052
Morn5	R16	3.22826e-38	1.88368
Pifo	R16	4.88302e-38	1.99823
Hsp90aa13	R16	6.02319e-38	2.58735
Lrrc51	R16	2.78588e-37	2.43797
AU040972	R16	3.35504e-35	1.9552
Pbx4	R16	2.01204e-34	1.10533
Hp1	R16	2.98795e-34	2.02416
Shisa8	R16	7.99494e-34	0.992515
Ccdc42	R16	1.61246e-32	0.342025
Rbp21	R16	1.36393e-30	0.487415
Ppil6	R16	1.26796e-29	0.698968
Crip14	R16	1.33509e-29	2.24413
Ly6c1	R16	6.28191e-29	3.27067
Spata24	R16	1.70068e-27	1.78168
Plet14	R16	1.30887e-26	1.82681
Mns13	R16	2.18129e-26	1.57795
Hdc3	R16	3.73711e-26	1.86431
Tspan14	R16	4.5822e-26	1.83383
Wdr93	R16	2.3498e-25	0.460565
Ttll91	R16	5.43701e-25	0.661135
2310007B03Rik	R16	1.37798e-24	0.290973
Ifit1bl1	R16	1.85265e-24	0.340248
Dmkn1	R16	1.6043e-23	0.903147
Mt13	R16	7.32914e-23	2.0718
Fth15	R16	1.40462e-21	1.36894
Agr21	R16	2.26675e-21	0.417076
Ccno	R16	5.40444e-21	2.32642
Cdkn1a6	R16	7.03364e-20	1.48792
Ampd11	R16	3.56452e-19	0.768051
Tm4sf1	R16	2.31558e-18	2.00342
Ascc12	R16	4.8959e-18	1.53629
Plvap	R16	1.42225e-17	0.559172
Cenpv	R16	9.75942e-17	0.846006
Cacna1s2	R16	9.90319e-17	2.32806
S100a64	R16	3.90794e-16	1.53319
Smim242	R16	5.14831e-16	1.2737
Cox6b21	R16	1.16747e-15	1.42492
Car31	R16	1.41833e-15	0.251067
Cks23	R16	2.13799e-15	1.77146
Cngb1	R16	1.1703e-14	0.766583
Col1a1	R16	1.50964e-14	0.251896
Cp	R16	1.92734e-14	1.47359
Dnah2	R16	2.22208e-14	0.295194
Sfta2	R16	5.8475e-14	2.0141
[truncated: 169 more rows]
