# Supplementary material for: Integrative analysis of scRNA-seq and scATAC-seq revealed transit-amplifying thymic epithelial cells expressing autoimmune regulator
Source: eLife. 2022 May 17;11:e73998. doi: 10.7554/eLife.73998 (PMC9113748; doi:10.7554/eLife.73998)
Supplement: Supplementary file 2. [file elife-73998-supp2.xlsx]

## Sheet: Related to Fig. 3
	Supplementary File 2. Percentage of scRNA-seq clusters in scATAC-seq clusters after the integration
			scRNA-seq
		Cluster	R0	R1	R2	R3	R4	R5	R6	R7	R8	R9	R10	R11	R12	R13	R14	R15	R16	R17
	scATAC-seq	0	0.567568	0.092376	0.105688	0.129488	0.00524405	0.00524405	0.0181525	0.00242033	0.00282372	0.0496168	0.00282372	0	0.000403388	0.00605083	0.00242033	0.000403388	0.00201694	0.00726099	1
		1	0.000449843	0.0139451	0.39946	0	0.419703	0.1426	0.000899685	0.000449843	0.00404858	0	0	0	0.0062978	0	0.000899685	0	0.000449843	0.0107962	1
		2	0.000936768	0.0248244	0.34192	0	0.412178	0.192506	0.00843091	0.000468384	0.00983607	0	0	0	0.00655738	0	0.000468384	0	0.000468384	0.00140515	1
		3	0.000471698	0.00377358	0.113208	0	0.116981	0.757547	0.00188679	0.000943396	0	0.000943396	0	0.000471698	0.00235849	0	0	0	0.000471698	0.000943396	1
		4	0.0413877	0.570907	0.234936	0	0.000608643	0.00243457	0.00365186	0	0	0.140596	0	0.000608643	0.000608643	0.000608643	0.00121729	0.000608643	0.00121729	0.000608643	1
		5	0.0467662	0.0119403	0.0248756	0.560199	0.00298507	0.0039801	0.0208955	0.0199005	0.00298507	0.00298507	0.273632	0	0.000995025	0.00995025	0.00199005	0.000995025	0.00199005	0.0129353	1
		6	0	0.00527426	0.0158228	0	0	0.0021097	0.972574	0	0	0	0.0021097	0	0	0	0.00105485	0	0.00105485	0	1
		7	0	0.00151976	0.00303951	0	0.0227964	0.00151976	0.00151976	0	0.803951	0	0	0.0136778	0.145897	0	0	0	0	0.00607903	1
		8	0.0151007	0.045302	0.0654362	0.011745	0.0134228	0.0100671	0.0134228	0.186242	0	0	0.114094	0	0.00503356	0.0033557	0	0.354027	0.122483	0.0402685	1
		9	0.017094	0.0119658	0.133333	0.124786	0.0017094	0.0102564	0.017094	0.610256	0.0017094	0.0017094	0.0666667	0	0	0.0034188	0	0	0	0	1
		10	0.0255474	0.00364964	0.00547445	0.0145985	0	0.00547445	0.00729927	0.00182482	0.0127737	0.00364964	0.00547445	0.281022	0.00182482	0.00364964	0.614964	0	0	0.0127737	1
		11	0.0222222	0.0031746	0.0222222	0.00634921	0	0.0031746	0.0031746	0	0.0031746	0	0.0031746	0	0	0.91746	0	0	0	0.015873	1
