# Supplementary material for: Integrative analysis of scRNA-seq and scATAC-seq revealed transit-amplifying thymic epithelial cells expressing autoimmune regulator
Source: eLife. 2022 May 17;11:e73998. doi: 10.7554/eLife.73998 (PMC9113748; doi:10.7554/eLife.73998)
Supplement: Supplementary file 3. [file elife-73998-supp3.xlsx]

## Sheet: da_peaks
Supplementary File 3. Differentially chromatin accessible regions between cluster 0 and cluster 4
	p_val	avg_log2FC	Cluster 0	Cluster 4	p_val_adj
chr4-59818588-59820628	7.54483e-62	-0.473195	0.085	0.335	1.44883e-56
chr5-24146177-24147512	5.62106e-40	-0.463843	0.027	0.17	1.07941e-34
chr12-30554993-30556006	7.74632e-33	-0.431624	0.054	0.214	1.48752e-27
chr14-60658978-60660420	1.67357e-40	-0.405584	0.035	0.181	3.21373e-35
chr4-133422633-133424728	5.67375e-40	-0.402349	0.109	0.323	1.08953e-34
chr1-129272573-129275280	1.37258e-33	-0.394493	0.061	0.221	2.63575e-28
chr10-95529416-95531858	2.01863e-34	-0.390674	0.073	0.24	3.87635e-29
chr2-91308348-91310045	9.31052e-43	-0.387473	0.039	0.192	1.78789e-37
chr13-102087291-102089916	6.39054e-44	-0.384374	0.049	0.219	1.22717e-38
chr14-115475204-115477979	5.46648e-31	-0.382579	0.054	0.2	1.04972e-25
chr16-4548186-4549970	6.65408e-33	-0.382329	0.084	0.252	1.27778e-27
chr9-97795987-97797486	2.66169e-27	-0.379259	0.032	0.152	5.11122e-22
chr2-152051719-152052796	2.99057e-23	-0.375367	0.044	0.155	5.74276e-18
chr13-28837918-28840030	1.41137e-40	-0.374651	0.049	0.216	2.71024e-35
chr9-105536815-105538301	3.60354e-32	-0.368121	0.055	0.203	6.91984e-27
chr12-111131541-111132880	5.50107e-26	-0.364494	0.089	0.253	1.05637e-20
chr18-76123969-76126750	1.21863e-34	-0.361298	0.082	0.258	2.34013e-29
chr9-42850455-42851481	9.347e-28	-0.359421	0.021	0.117	1.79489e-22
chr7-131520785-131521607	1.82072e-19	-0.355128	0.041	0.149	3.49632e-14
chr8-125847284-125848456	3.14927e-22	-0.354623	0.084	0.226	6.04752e-17
chr2-172457945-172459052	2.02399e-35	-0.351426	0.015	0.118	3.88665e-30
chr2-33808901-33811370	4.05675e-25	-0.351062	0.057	0.189	7.79014e-20
chr13-3907120-3908816	1.36476e-23	-0.349854	0.062	0.197	2.62074e-18
chr14-72466123-72467187	1.22135e-28	-0.347681	0.026	0.135	2.34535e-23
chr11-75924866-75927449	2.62376e-33	-0.347017	0.136	0.348	5.03838e-28
chr2-170021811-170025305	1.2979e-45	-0.346826	0.048	0.231	2.49235e-40
chr9-32342903-32345264	6.80639e-27	-0.339609	0.047	0.171	1.30703e-21
chr16-12521372-12522595	5.37799e-30	-0.339279	0.044	0.176	1.03273e-24
chr13-48744077-48746994	1.24264e-36	-0.33851	0.081	0.262	2.38623e-31
chr11-116594968-116596196	8.27264e-24	-0.335663	0.033	0.138	1.58859e-18
chr6-24099868-24101800	5.68175e-23	-0.335114	0.048	0.161	1.09106e-17
chr12-109714395-109715505	2.22689e-17	-0.333516	0.044	0.147	4.27628e-12
chr6-138420592-138423355	1.66332e-24	-0.328864	0.047	0.169	3.19406e-19
chr5-75574203-75577306	1.44355e-32	-0.328118	0.136	0.34	2.77203e-27
chr6-114811920-114815300	6.1556e-27	-0.326198	0.092	0.259	1.18205e-21
chr2-157286758-157288214	7.54249e-29	-0.326063	0.053	0.186	1.44838e-23
chr17-56756152-56758799	1.23251e-42	-0.325112	0.096	0.307	2.36679e-37
chr11-4278418-4280531	8.36117e-27	-0.32453	0.069	0.225	1.60559e-21
chr6-134020472-134021628	2.29627e-21	-0.3234	0.075	0.211	4.40951e-16
chr4-133020807-133027291	4.3181e-30	-0.323287	0.175	0.401	8.29201e-25
chr8-114798107-114799511	1.11997e-19	-0.32155	0.05	0.162	2.15068e-14
chr17-12867859-12871319	1.46367e-26	-0.320753	0.094	0.265	2.81067e-21
chr13-37680605-37681837	3.37851e-31	-0.320606	0.077	0.243	6.48771e-26
chr8-34325009-34327609	1.16404e-37	-0.318916	0.073	0.262	2.23529e-32
chr10-36728770-36730686	7.26931e-23	-0.318811	0.083	0.23	1.39592e-17
chr9-48822632-48824873	2.03059e-18	-0.31864	0.061	0.179	3.89932e-13
chr12-107839919-107841061	2.1593e-25	-0.318174	0.02	0.113	4.14648e-20
chr9-65100604-65104837	1.84238e-47	-0.318126	0.112	0.335	3.53791e-42
chr11-119148387-119151439	1.40344e-23	-0.314896	0.117	0.282	2.69501e-18
chr15-95745107-95747285	1.77482e-39	-0.314254	0.035	0.185	3.40817e-34
chr17-27239850-27243162	4.78626e-31	-0.313528	0.073	0.234	9.19101e-26
chr3-41569548-41571072	1.32844e-20	-0.313256	0.041	0.146	2.55099e-15
chr13-34128179-34134659	1.79859e-65	-0.312732	0.26	0.57	3.45381e-60
chr9-87117653-87119517	1.29917e-18	-0.311272	0.035	0.125	2.49477e-13
chr4-82949392-82950129	2.77079e-21	-0.310558	0.023	0.11	5.32072e-16
chr12-107971375-107974323	6.07656e-31	-0.310549	0.07	0.231	1.16688e-25
chr9-29953677-29955162	5.93588e-20	-0.310401	0.111	0.268	1.13986e-14
chr4-59841479-59845636	2.19908e-23	-0.310079	0.098	0.248	4.22288e-18
chr1-92259591-92260590	7.8259e-20	-0.310058	0.036	0.135	1.5028e-14
chr3-85713873-85714813	1.30471e-18	-0.309703	0.034	0.122	2.50542e-13
chr7-139427120-139428368	2.92267e-26	-0.309234	0.041	0.168	5.61237e-21
chr4-148403111-148404747	1.46369e-15	-0.308601	0.055	0.157	2.81071e-10
chr10-87057175-87059744	1.7883e-32	-0.30751	0.082	0.251	3.43405e-27
chr2-165239429-165240593	7.37203e-22	-0.306849	0.031	0.134	1.41564e-16
chr8-16677048-16677994	1.23085e-21	-0.306611	0.048	0.163	2.36358e-16
chr2-49860041-49861968	7.97523e-18	-0.306541	0.069	0.187	1.53148e-12
chr10-112862898-112865178	6.84592e-19	-0.306329	0.045	0.147	1.31462e-13
chr14-18394647-18395680	6.35753e-16	-0.30621	0.027	0.108	1.22083e-10
chr5-112039220-112041757	2.05158e-15	-0.305165	0.067	0.177	3.93963e-10
chr17-9929459-9931859	2.38299e-28	-0.304117	0.031	0.152	4.57602e-23
chr1-41959020-41961424	9.83169e-19	-0.303127	0.038	0.127	1.88797e-13
chr6-100203371-100205163	5.15712e-26	-0.302991	0.034	0.147	9.90316e-21
chr1-80060432-80062053	2.17047e-20	-0.302739	0.025	0.11	4.16792e-15
chr11-116885116-116887527	4.95191e-25	-0.299591	0.117	0.293	9.5091e-20
chr1-128590572-128594938	5.05029e-31	-0.299275	0.146	0.354	9.69802e-26
chr17-11972194-11974087	5.10847e-21	-0.297835	0.141	0.305	9.80975e-16
chr14-30606794-30608816	2.83851e-18	-0.297724	0.059	0.169	5.45077e-13
chr18-46572859-46575410	2.11155e-20	-0.297006	0.059	0.173	4.05479e-15
chr6-118064884-118068143	5.6609e-23	-0.296961	0.18	0.379	1.08706e-17
chr10-53335051-53337492	1.71922e-14	-0.296853	0.056	0.156	3.3014e-09
chr2-145401314-145402770	3.61051e-23	-0.296818	0.058	0.192	6.93323e-18
chr13-70013020-70013750	1.97298e-14	-0.29655	0.039	0.122	3.78869e-09
chr13-23533403-23536539	7.12124e-28	-0.29627	0.134	0.334	1.36748e-22
chr13-23750757-23752988	1.63115e-23	-0.296111	0.086	0.234	3.13228e-18
chr8-125857525-125859705	2.8227e-16	-0.295693	0.054	0.151	5.4204e-11
chr5-141404420-141405492	5.77341e-19	-0.294699	0.031	0.121	1.10866e-13
chr15-86109288-86111474	2.34581e-19	-0.294471	0.044	0.149	4.50463e-14
chr4-44968335-44971367	6.52065e-21	-0.294023	0.126	0.283	1.25215e-15
chr3-87718111-87719141	8.48479e-14	-0.293879	0.051	0.147	1.62933e-08
chr13-93718096-93720145	1.06477e-15	-0.292755	0.104	0.234	2.04468e-10
chr17-56236511-56237433	1.28531e-22	-0.292133	0.037	0.143	2.46817e-17
chr8-68087359-68088499	1.65815e-16	-0.291911	0.04	0.133	3.18413e-11
chr12-77532541-77534422	1.18755e-13	-0.29165	0.064	0.169	2.28043e-08
chr8-12872930-12875891	2.09274e-28	-0.29163	0.173	0.391	4.01867e-23
chr2-105972503-105973428	5.6474e-18	-0.291217	0.033	0.119	1.08446e-12
chr2-159876239-159877559	2.1914e-19	-0.291196	0.038	0.142	4.20812e-14
chr10-87488178-87495433	9.88878e-50	-0.291165	0.247	0.536	1.89893e-44
chr11-118545012-118546031	1.16158e-14	-0.290958	0.028	0.102	2.23056e-09
chr19-46653210-46654381	1.94229e-25	-0.290845	0.017	0.104	3.72977e-20
chr5-113293504-113294742	1.33807e-15	-0.290835	0.04	0.126	2.56948e-10
chr13-29737420-29739036	6.16857e-21	-0.290758	0.078	0.216	1.18454e-15
chr19-61311979-61313792	1.69754e-16	-0.289826	0.117	0.256	3.25978e-11
chr13-73257876-73261492	7.27969e-21	-0.289499	0.034	0.126	1.39791e-15
chr8-83898391-83901855	1.42538e-34	-0.28902	0.099	0.296	2.73714e-29
chr10-107635265-107636967	7.07393e-21	-0.288809	0.025	0.114	1.3584e-15
chr9-99478474-99481337	6.67562e-19	-0.288563	0.092	0.235	1.28191e-13
chr5-139977004-139979898	3.43558e-17	-0.2885	0.145	0.296	6.59732e-12
chr15-82967853-82970065	6.53e-22	-0.288484	0.064	0.189	1.25395e-16
chr1-12759679-12761834	5.2362e-19	-0.288163	0.124	0.281	1.0055e-13
chr13-48662320-48666565	2.36996e-25	-0.28783	0.088	0.243	4.551e-20
chr4-76766272-76767875	1.60582e-32	-0.287666	0.037	0.161	3.08364e-27
chr15-62168801-62170719	4.32439e-15	-0.287535	0.098	0.234	8.30409e-10
chr15-99663723-99665764	1.70849e-22	-0.287522	0.106	0.259	3.28079e-17
chr6-105232745-105234302	4.86154e-17	-0.287096	0.058	0.164	9.33557e-12
chr7-144526184-144528318	3.3877e-17	-0.286545	0.091	0.219	6.50537e-12
chr11-115949325-115951568	3.74104e-21	-0.286302	0.11	0.259	7.18388e-16
chr18-20465828-20468087	5.97494e-23	-0.286128	0.121	0.289	1.14736e-17
chr11-4735512-4736759	1.44088e-19	-0.285817	0.037	0.136	2.76691e-14
chr10-77846508-77848073	8.58165e-26	-0.285565	0.014	0.1	1.64793e-20
chr8-17558056-17562990	1.90284e-26	-0.285498	0.167	0.371	3.654e-21
chr10-82934435-82936132	4.5014e-16	-0.285471	0.038	0.127	8.644e-11
chr8-17532054-17536034	9.90528e-27	-0.284852	0.082	0.238	1.9021e-21
chr5-102248583-102249426	3.78015e-17	-0.284406	0.033	0.113	7.25897e-12
chr13-15461901-15465474	4.30351e-39	-0.28424	0.109	0.324	8.264e-34
chr15-40654208-40656992	1.88468e-26	-0.284184	0.052	0.181	3.61914e-21
chr8-126790743-126791696	8.72469e-20	-0.284168	0.029	0.117	1.67539e-14
chr15-100188494-100190282	1.62446e-23	-0.284162	0.081	0.226	3.11943e-18
chr10-87097828-87103874	7.46141e-29	-0.283959	0.192	0.404	1.43281e-23
chr5-97901349-97902622	2.69043e-18	-0.283697	0.043	0.15	5.1664e-13
chr7-111515354-111519623	5.30065e-20	-0.282586	0.166	0.352	1.01788e-14
chr16-58385965-58386818	9.77956e-14	-0.281938	0.044	0.13	1.87796e-08
chr5-136101555-136102922	8.07524e-22	-0.280613	0.075	0.209	1.55068e-16
chr13-95497491-95498859	1.00734e-16	-0.280289	0.038	0.13	1.93438e-11
chr9-79456233-79458163	6.74406e-21	-0.280273	0.068	0.201	1.29506e-15
chr17-35115393-35116658	3.41901e-15	-0.280079	0.1	0.227	6.56549e-10
chr6-96499247-96500243	5.13158e-17	-0.279878	0.1	0.236	9.85413e-12
chr17-26544287-26545083	2.48624e-11	-0.279693	0.042	0.125	4.7743e-06
chr11-32596054-32597308	7.6367e-14	-0.279006	0.072	0.18	1.46647e-08
chr16-21271593-21275109	1.92932e-17	-0.277809	0.118	0.263	3.70485e-12
chr2-146216102-146224614	2.68275e-40	-0.277647	0.367	0.63	5.15166e-35
chr14-59732544-59734720	6.86614e-13	-0.277534	0.079	0.181	1.3185e-07
chr13-37674076-37675461	2.4787e-13	-0.277324	0.074	0.18	4.75983e-08
chr11-116069919-116072025	2.68606e-15	-0.277127	0.069	0.18	5.15802e-10
chr3-40189125-40190408	9.71377e-17	-0.277092	0.046	0.149	1.86532e-11
chr13-118620795-118622229	3.2444e-14	-0.276918	0.053	0.144	6.23019e-09
chr1-9876241-9878912	5.77819e-16	-0.276523	0.1	0.234	1.10958e-10
chr9-103912391-103914137	9.1696e-17	-0.276324	0.126	0.266	1.76083e-11
chr11-86919544-86922476	2.25746e-20	-0.275527	0.075	0.206	4.33498e-15
chr10-24481742-24483121	1.326e-18	-0.275326	0.038	0.134	2.5463e-13
chr6-24248061-24249730	4.95241e-14	-0.274878	0.036	0.122	9.51006e-09
chr5-113126797-113129007	8.16666e-24	-0.274315	0.081	0.231	1.56823e-18
chr1-35652561-35654093	1.34288e-26	-0.273986	0.073	0.222	2.57872e-21
chr2-173025973-173028908	7.05084e-26	-0.273794	0.078	0.222	1.35397e-20
chr2-18872709-18874522	5.446e-22	-0.273686	0.05	0.159	1.04579e-16
chr8-94375386-94380085	3.81587e-28	-0.27357	0.139	0.332	7.32758e-23
chr18-46463303-46466771	8.05124e-22	-0.273421	0.095	0.242	1.54607e-16
chr1-158480066-158481062	3.10644e-19	-0.273064	0.023	0.103	5.96527e-14
chr10-77683982-77688430	1.84169e-24	-0.273	0.156	0.352	3.53657e-19
chr11-60393020-60394244	7.63837e-20	-0.272833	0.027	0.116	1.46679e-14
chr12-28522342-28524429	2.02553e-18	-0.272704	0.059	0.177	3.8896e-13
chr7-111799851-111801226	2.00223e-15	-0.27247	0.039	0.124	3.84486e-10
chr15-95934618-95935709	1.19371e-10	-0.272305	0.047	0.13	2.29226e-05
chr16-51935834-51937770	2.64333e-26	-0.271631	0.025	0.127	5.07597e-21
chr6-87980238-87982445	2.23022e-26	-0.271568	0.04	0.161	4.28266e-21
chr7-132484230-132485552	8.22384e-21	-0.27155	0.09	0.233	1.57922e-15
chr7-126037994-126039907	1.37266e-21	-0.271423	0.048	0.162	2.6359e-16
chr10-70059629-70061249	7.64331e-22	-0.271388	0.069	0.201	1.46774e-16
chr14-87567033-87569592	4.13513e-23	-0.271352	0.06	0.191	7.94064e-18
chr11-61654860-61662717	2.67151e-17	-0.27115	0.215	0.399	5.13008e-12
chr7-111790863-111792776	9.70497e-17	-0.270676	0.037	0.126	1.86364e-11
chr3-116157315-116158140	1.02313e-15	-0.270061	0.042	0.135	1.9647e-10
chr11-83796187-83797716	7.01703e-14	-0.269034	0.048	0.133	1.34747e-08
chr1-81744028-81746663	6.17661e-22	-0.268919	0.082	0.227	1.18609e-16
chr10-3792635-3795466	5.58958e-17	-0.268763	0.173	0.337	1.07336e-11
chr9-30148081-30151564	1.46637e-30	-0.268604	0.093	0.263	2.81586e-25
chr12-108001673-108006889	8.85234e-31	-0.268451	0.192	0.417	1.69991e-25
chr2-20379972-20381249	7.63149e-21	-0.268442	0.058	0.173	1.46547e-15
chr5-8937467-8938630	1.66169e-17	-0.268404	0.035	0.124	3.19092e-12
chr14-66634640-66638537	2.35219e-20	-0.268161	0.106	0.259	4.5169e-15
chr11-108298931-108302696	5.79229e-15	-0.268138	0.093	0.225	1.11229e-09
chr11-107661296-107663463	6.24813e-16	-0.268006	0.053	0.156	1.19982e-10
chr15-7127547-7135106	4.69825e-44	-0.267953	0.19	0.447	9.02201e-39
chr1-92252781-92253657	2.01705e-13	-0.267869	0.035	0.107	3.87332e-08
chr6-148046589-148047938	6.14071e-14	-0.267852	0.027	0.102	1.17919e-08
chr17-25689357-25690180	5.21558e-13	-0.267712	0.033	0.11	1.00154e-07
chr16-11982449-11989180	2.50594e-21	-0.267394	0.213	0.402	4.81214e-16
chr12-94360743-94361862	4.33639e-18	-0.267358	0.035	0.128	8.32713e-13
chr14-115594918-115596197	1.44741e-10	-0.267295	0.071	0.164	2.77944e-05
chr17-12261422-12264260	6.8414e-22	-0.266558	0.039	0.149	1.31375e-16
chr15-75648016-75649445	3.02581e-17	-0.266289	0.029	0.109	5.81044e-12
chr15-58684288-58686158	1.09717e-21	-0.266268	0.035	0.141	2.10688e-16
chr17-14594311-14596005	6.76681e-21	-0.266252	0.037	0.141	1.29942e-15
chr17-71808041-71809967	5.34423e-14	-0.265888	0.044	0.135	1.02625e-08
chr9-94659239-94660295	1.27138e-16	-0.265731	0.117	0.249	2.44142e-11
chr10-84712290-84715591	1.62166e-20	-0.265598	0.113	0.273	3.11406e-15
chr11-21638090-21638878	9.41599e-12	-0.265563	0.049	0.13	1.80814e-06
chr14-121872627-121874247	1.14348e-18	-0.265518	0.079	0.201	2.19581e-13
chr18-23038353-23042331	6.11365e-30	-0.2652	0.245	0.474	1.174e-24
chr16-29939955-29941430	2.11771e-15	-0.265159	0.044	0.131	4.06661e-10
chr18-78052336-78054125	2.18986e-12	-0.265105	0.079	0.186	4.20517e-07
chr2-35208864-35210416	3.36265e-14	-0.264951	0.066	0.174	6.45727e-09
chr10-88575783-88576703	7.96008e-14	-0.264551	0.042	0.124	1.52857e-08
chr18-76127568-76129010	8.28105e-18	-0.264395	0.052	0.158	1.5902e-12
chr6-65563288-65565438	7.73422e-18	-0.264365	0.07	0.197	1.48519e-12
chr10-83721871-83725004	1.88972e-24	-0.264021	0.07	0.212	3.62882e-19
chr7-83725864-83728209	2.36056e-14	-0.26383	0.106	0.237	4.53296e-09
chr13-113815052-113816783	4.36111e-16	-0.263597	0.082	0.203	8.3746e-11
chr12-112923786-112933812	5.38461e-47	-0.263113	0.179	0.451	1.034e-41
chr16-5532279-5533052	1.13278e-11	-0.262798	0.036	0.108	2.17527e-06
chr9-67130614-67131727	3.44216e-13	-0.26186	0.043	0.126	6.60994e-08
chr13-44026059-44027913	3.24814e-15	-0.261666	0.048	0.144	6.23737e-10
chr8-122872888-122873787	3.32449e-14	-0.261411	0.039	0.122	6.38399e-09
chr12-17790213-17791305	1.87895e-10	-0.261253	0.04	0.116	3.60813e-05
chr7-24807897-24809781	1.25227e-11	-0.261233	0.117	0.241	2.40472e-06
chr13-73268437-73269368	2.67421e-13	-0.261022	0.031	0.104	5.13525e-08
chr4-83390427-83391645	5.29737e-14	-0.260693	0.046	0.127	1.01725e-08
chr12-111844850-111847346	4.76937e-11	-0.260561	0.102	0.214	9.15857e-06
chr11-117406655-117410486	4.84994e-16	-0.26039	0.085	0.198	9.3133e-11
chr11-102936182-102938168	6.9449e-11	-0.260081	0.109	0.232	1.33362e-05
chr9-40743059-40744975	4.43861e-13	-0.259835	0.125	0.255	8.52342e-08
chr1-38180033-38181922	5.75683e-13	-0.259777	0.09	0.197	1.10548e-07
chr2-5804178-5805530	2.42683e-11	-0.259701	0.03	0.101	4.66021e-06
chr15-83002592-83003732	6.40789e-17	-0.259687	0.043	0.141	1.2305e-11
chr19-42189386-42190972	5.73444e-14	-0.25951	0.079	0.193	1.10118e-08
chr6-52157557-52174050	2.45451e-51	-0.25885	0.359	0.648	4.71337e-46
chr3-149379104-149381358	1.29162e-11	-0.258791	0.076	0.177	2.48028e-06
chr6-56485028-56486406	4.76796e-14	-0.258553	0.043	0.125	9.15587e-09
chr1-124043405-124046994	6.91538e-15	-0.257994	0.093	0.22	1.32795e-09
chr6-108777948-108778882	9.81913e-12	-0.257814	0.038	0.112	1.88556e-06
chr7-126963298-126964631	6.44909e-13	-0.257221	0.056	0.152	1.23841e-07
chr19-14320352-14321874	7.79609e-14	-0.257177	0.079	0.198	1.49708e-08
chr1-74709285-74710070	9.60357e-13	-0.257037	0.034	0.11	1.84416e-07
chr4-130781153-130783466	9.67829e-17	-0.256998	0.06	0.169	1.85851e-11
chr15-66686329-66688118	2.91035e-12	-0.256988	0.041	0.117	5.58871e-07
chr12-86692190-86693869	1.91372e-11	-0.256867	0.063	0.158	3.6749e-06
chr6-64727435-64730588	1.30448e-17	-0.256634	0.052	0.16	2.50498e-12
chr18-45557555-45560984	1.18659e-20	-0.256011	0.072	0.207	2.27861e-15
chr1-14503038-14509107	5.50065e-23	-0.255933	0.102	0.262	1.05628e-17
chr10-88590477-88592012	2.51663e-17	-0.255917	0.058	0.168	4.83266e-12
chr5-122715635-122717190	1.76975e-10	-0.25591	0.057	0.147	3.39843e-05
chr13-84373073-84374152	4.27417e-10	-0.255667	0.055	0.137	8.20765e-05
chr7-16987232-16989424	9.05859e-14	-0.255664	0.132	0.267	1.73951e-08
chr3-89882303-89884286	6.94085e-17	-0.255599	0.048	0.15	1.33284e-11
chr3-79556347-79557154	2.63495e-11	-0.255585	0.04	0.113	5.05987e-06
chr1-169270787-169273109	5.67326e-24	-0.255508	0.121	0.295	1.08943e-18
chr8-61285599-61288844	7.46098e-15	-0.25521	0.1	0.233	1.43272e-09
chr7-80454041-80458955	4.4797e-23	-0.255172	0.084	0.235	8.60232e-18
chr14-32682483-32685860	3.04717e-17	-0.255025	0.106	0.247	5.85144e-12
chr2-124434391-124437050	1.74636e-23	-0.253797	0.075	0.219	3.35351e-18
chr14-32823768-32826017	1.32245e-18	-0.253537	0.102	0.256	2.53949e-13
chr11-113988857-113992530	7.83969e-23	-0.253083	0.062	0.192	1.50545e-17
chr7-30607661-30609035	4.02917e-13	-0.253041	0.124	0.245	7.73718e-08
chr14-121620240-121621216	7.36912e-11	-0.252886	0.038	0.112	1.41508e-05
chr10-60193089-60196238	7.90498e-20	-0.252667	0.18	0.365	1.51799e-14
chr11-24296328-24298162	1.72937e-19	-0.252194	0.035	0.137	3.32089e-14
chr8-45871192-45872945	4.82351e-20	-0.252182	0.054	0.169	9.26253e-15
chr10-88626700-88627639	1.93102e-12	-0.252027	0.048	0.13	3.70811e-07
chr11-102769054-102771177	1.86945e-12	-0.251775	0.093	0.203	3.58989e-07
chr17-27329191-27330412	3.89372e-14	-0.251767	0.052	0.146	7.47708e-09
chr11-17263855-17265443	1.14777e-15	-0.251655	0.041	0.13	2.20405e-10
chr14-27171118-27176337	5.23131e-25	-0.251576	0.174	0.376	1.00456e-19
chr4-129983280-129988669	1.02902e-23	-0.250923	0.214	0.409	1.97602e-18
chr9-24010868-24012124	1.30774e-09	-0.250813	0.075	0.164	0.000251123
chr9-48525671-48527432	3.8822e-12	-0.250653	0.065	0.164	7.45495e-07
chr10-96479089-96481907	9.5518e-21	-0.250615	0.075	0.211	1.83422e-15
chr14-21981160-21992750	1.15627e-60	-0.250521	0.343	0.645	2.22037e-55
chr8-78423643-78424325	7.07594e-10	-0.250245	0.035	0.104	0.000135879
chr9-107733095-107736987	4.1378e-18	-0.250132	0.125	0.276	7.94577e-13
chr12-109698271-109699105	8.5736e-20	-0.250052	0.022	0.103	1.64638e-14
chr11-87754439-87761204	4.39295e-32	0.250041	0.293	0.185	8.43573e-27
chr15-98155826-98156520	3.6646e-22	0.250437	0.102	0.033	7.03709e-17
chr1-98171098-98175177	6.32535e-30	0.250683	0.309	0.207	1.21465e-24
chr17-29928537-29929581	5.36793e-33	0.250728	0.113	0.03	1.0308e-27
chr18-9393103-9394524	6.86327e-28	0.25101	0.104	0.033	1.31795e-22
chr5-28596428-28599663	9.81396e-29	0.251226	0.159	0.079	1.88456e-23
chr1-133208489-133216214	9.8604e-35	0.251283	0.199	0.093	1.89348e-29
chr17-29215471-29216778	1.23676e-23	0.253306	0.102	0.037	2.37494e-18
chr1-13004795-13006046	4.71347e-25	0.25505	0.119	0.048	9.05123e-20
chr18-60637039-60638786	5.81213e-30	0.255944	0.125	0.04	1.1161e-24
chr2-126495163-126497244	1.60957e-24	0.256331	0.129	0.052	3.09085e-19
chr10-127192407-127193715	4.85161e-21	0.256605	0.109	0.042	9.31651e-16
chr18-65397367-65398449	3.80306e-33	0.257679	0.108	0.026	7.30297e-28
chr5-148894430-148897550	8.71606e-31	0.257974	0.187	0.087	1.67374e-25
chr17-34372030-34373814	6.65891e-30	0.258248	0.105	0.03	1.2787e-24
chr5-64343658-64345984	4.57817e-37	0.259654	0.174	0.074	8.79142e-32
chr9-64666537-64668350	2.66806e-27	0.259936	0.109	0.03	5.12344e-22
chr11-86732696-86734971	3.19772e-28	0.26143	0.125	0.047	6.14055e-23
chr6-95711122-95713228	2.66218e-24	0.261904	0.129	0.057	5.11216e-19
chr10-95438412-95441121	7.683e-32	0.262381	0.173	0.08	1.47536e-26
chr16-39283656-39285828	1.58895e-26	0.26368	0.13	0.045	3.05124e-21
chr4-125911231-125913076	3.94922e-28	0.264958	0.119	0.046	7.58365e-23
chr9-36642878-36644073	4.11364e-26	0.265825	0.117	0.042	7.89937e-21
chr11-22692323-22693873	3.99354e-28	0.266087	0.186	0.092	7.66876e-23
chr9-59095404-59098274	4.2758e-34	0.268148	0.112	0.029	8.21077e-29
chr4-117135619-117136712	7.71453e-33	0.26877	0.101	0.02	1.48141e-27
chr5-66050372-66054917	6.15529e-33	0.268859	0.168	0.068	1.18199e-27
chr15-83106088-83108610	8.87566e-30	0.269281	0.18	0.088	1.70438e-24
chr2-127667277-127668798	2.16156e-27	0.269482	0.132	0.052	4.15083e-22
chr11-100220895-100222436	9.89816e-33	0.269759	0.101	0.023	1.90073e-27
chr2-132513673-132518880	8.1765e-32	0.269762	0.2	0.099	1.57013e-26
chr2-70841807-70843714	4.21587e-33	0.269898	0.118	0.033	8.0957e-28
chr18-56399210-56401319	6.17287e-29	0.270125	0.135	0.049	1.18537e-23
chr2-69138875-69141623	3.64406e-32	0.270546	0.112	0.033	6.99765e-27
chr3-104937646-104940056	6.34852e-31	0.271809	0.144	0.06	1.2191e-25
chr5-139673948-139678010	1.20458e-31	0.272278	0.222	0.126	2.31315e-26
chr2-27572414-27573876	9.81495e-29	0.272518	0.134	0.048	1.88475e-23
chr18-20969194-20971632	4.28334e-30	0.272703	0.142	0.055	8.22526e-25
chr7-84195939-84197857	1.65811e-33	0.27412	0.121	0.037	3.18406e-28
chr18-74641052-74643174	2.30173e-29	0.275047	0.145	0.063	4.41998e-24
chr5-115160600-115161831	3.24726e-30	0.27599	0.104	0.029	6.23568e-25
chr4-135291723-135295511	4.59023e-46	0.276251	0.363	0.222	8.81457e-41
chr13-97565092-97568059	2.60684e-35	0.276679	0.108	0.027	5.00588e-30
chr12-44085476-44086390	1.38377e-26	0.277589	0.107	0.035	2.65725e-21
chr8-122211139-122212285	2.33379e-34	0.277688	0.126	0.04	4.48156e-29
chr11-87879436-87880552	2.19677e-26	0.278462	0.102	0.032	4.21844e-21
chr6-100823251-100826909	7.19624e-37	0.278654	0.24	0.128	1.38189e-31
chr15-102148867-102151395	1.05934e-37	0.279068	0.117	0.03	2.03425e-32
chr8-46408652-46409794	4.47428e-32	0.281089	0.103	0.024	8.59191e-27
chr4-139508500-139509769	1.32574e-27	0.28171	0.15	0.062	2.5458e-22
chr5-134245294-134246792	1.78529e-31	0.282213	0.134	0.044	3.42828e-26
chr7-133869789-133870811	2.17763e-26	0.282349	0.122	0.046	4.18168e-21
chr5-139296690-139301432	2.02052e-38	0.28236	0.201	0.086	3.87998e-33
chr14-118678048-118679916	1.81108e-29	0.282849	0.187	0.083	3.47779e-24
chr4-45964643-45968315	2.69853e-39	0.283052	0.148	0.047	5.18195e-34
chr14-62505556-62507152	1.03496e-28	0.283527	0.164	0.074	1.98742e-23
chr3-36797011-36798734	4.51613e-31	0.28407	0.102	0.026	8.67229e-26
chr15-91615236-91617214	5.98792e-27	0.285761	0.153	0.066	1.14985e-21
chr7-45548732-45552784	9.56717e-32	0.286639	0.126	0.039	1.83717e-26
chr6-88717434-88718841	6.39421e-35	0.287994	0.123	0.036	1.22787e-29
chr8-22691471-22694878	1.85849e-47	0.28997	0.154	0.041	3.56883e-42
chr17-70856744-70857742	1.58447e-37	0.291687	0.106	0.02	3.04263e-32
chr15-96735494-96737366	3.82962e-38	0.292936	0.1	0.016	7.35398e-33
chr17-70929334-70930422	4.69169e-26	0.294028	0.117	0.043	9.00941e-21
chr6-146612080-146613373	3.137e-33	0.294079	0.107	0.028	6.02395e-28
chr19-56599470-56603092	3.48931e-42	0.294478	0.216	0.094	6.70048e-37
chr9-70941993-70943835	5.01465e-47	0.295655	0.181	0.06	9.62959e-42
chr11-54819501-54821092	5.445e-31	0.295669	0.185	0.091	1.0456e-25
chr3-32380830-32382114	2.04949e-36	0.296107	0.106	0.024	3.93562e-31
chr2-31118133-31119612	4.70982e-34	0.296517	0.122	0.034	9.04422e-29
chr3-3563658-3564913	2.31427e-31	0.297019	0.13	0.041	4.44407e-26
chr9-108581629-108583367	2.10649e-31	0.298033	0.127	0.043	4.04508e-26
chr11-59891970-59895838	4.51054e-39	0.298046	0.19	0.082	8.66155e-34
chr13-5831089-5833193	2.36755e-36	0.2981	0.169	0.066	4.54637e-31
chr4-89478544-89479689	1.26621e-36	0.298982	0.1	0.016	2.4315e-31
chr11-108197015-108200127	2.57765e-36	0.29911	0.127	0.036	4.94984e-31
chr1-183992749-183994605	4.52653e-35	0.299595	0.161	0.058	8.69225e-30
chr2-84755359-84759216	6.23126e-36	0.299712	0.17	0.065	1.19658e-30
chr4-47109171-47110600	6.51547e-32	0.299872	0.115	0.033	1.25116e-26
chr5-97075337-97076395	5.49817e-34	0.300689	0.102	0.023	1.05581e-28
chr18-46647889-46649208	1.16095e-35	0.301485	0.159	0.06	2.22937e-30
chr4-126822798-126825416	6.11281e-40	0.303408	0.19	0.076	1.17384e-34
chr2-60369232-60371048	3.60163e-35	0.303443	0.136	0.04	6.91617e-30
chr1-184807560-184813336	1.6916e-53	0.304799	0.322	0.175	3.24837e-48
chr13-42227845-42229666	2.3355e-32	0.305044	0.12	0.033	4.48484e-27
chr6-122589721-122592138	1.46776e-46	0.305432	0.17	0.05	2.81853e-41
chr19-17264623-17265402	2.84043e-31	0.30577	0.101	0.023	5.45444e-26
chr14-30558962-30562253	2.12593e-42	0.306257	0.263	0.126	4.08241e-37
chr17-63684932-63686946	5.65556e-34	0.307245	0.165	0.069	1.08603e-28
chr4-134058124-134062637	3.49164e-48	0.307285	0.203	0.074	6.70496e-43
chr2-126635878-126637069	5.20791e-34	0.307771	0.136	0.046	1.00007e-28
chr6-70871959-70872790	1.54197e-45	0.308151	0.109	0.013	2.96103e-40
chr19-24526709-24529673	1.22677e-43	0.309143	0.121	0.024	2.35575e-38
chr14-23385592-23386442	1.31365e-36	0.309195	0.111	0.029	2.52258e-31
chr6-136427186-136429887	9.01985e-34	0.309222	0.123	0.033	1.73207e-28
chr5-99098966-99101153	2.44358e-37	0.309453	0.166	0.063	4.69238e-32
chr5-28500742-28502167	1.43515e-39	0.309507	0.129	0.032	2.7559e-34
chr12-81107499-81109262	2.87692e-40	0.310339	0.169	0.057	5.52452e-35
chr2-34952781-34955056	5.12108e-36	0.310788	0.106	0.022	9.83396e-31
chr7-111597223-111598844	2.86078e-34	0.311824	0.146	0.052	5.49352e-29
chr18-82507516-82510266	3.61757e-46	0.312178	0.206	0.083	6.94679e-41
chr15-16566035-16567221	1.09006e-34	0.314492	0.181	0.073	2.09324e-29
chr5-137263328-137265270	3.34601e-45	0.316887	0.139	0.032	6.42531e-40
chr4-128784812-128790516	6.50155e-50	0.317405	0.432	0.277	1.24849e-44
chr4-133613506-133615630	1.27061e-56	0.317784	0.232	0.082	2.43994e-51
chr16-97657735-97659890	1.3756e-44	0.319198	0.192	0.07	2.64155e-39
chr2-31079935-31084924	2.15198e-54	0.320054	0.33	0.178	4.13243e-49
chr17-35532231-35533575	2.72127e-35	0.321686	0.142	0.046	5.22563e-30
chr1-93703127-93706408	1.95124e-49	0.323992	0.202	0.072	3.74695e-44
chr4-116055874-116056936	2.98765e-33	0.325901	0.123	0.035	5.73716e-28
chr13-44651174-44652626	8.3193e-41	0.332185	0.16	0.054	1.59755e-35
chr3-98187570-98188813	1.66687e-37	0.334988	0.143	0.044	3.20088e-32
chr11-33601062-33602422	4.25749e-44	0.335463	0.12	0.023	8.17562e-39
chr7-127921472-127923524	5.81122e-49	0.336607	0.161	0.041	1.11592e-43
chr17-74677654-74679420	7.86946e-47	0.338248	0.125	0.021	1.51116e-41
chr8-40572611-40574085	1.71028e-52	0.33858	0.137	0.022	3.28423e-47
chr3-149235801-149237235	9.28579e-41	0.339021	0.178	0.063	1.78314e-35
chr7-64751317-64754797	4.21987e-47	0.339089	0.208	0.073	8.10337e-42
chr6-122650238-122651393	7.53377e-35	0.339509	0.117	0.029	1.4467e-29
chr7-12010233-12011036	1.28527e-32	0.340853	0.128	0.037	2.46808e-27
chr11-103229613-103231642	6.17855e-47	0.34103	0.201	0.075	1.18646e-41
chr12-98892022-98893090	6.59889e-41	0.341472	0.105	0.015	1.26718e-35
chr13-76063977-76065383	3.7665e-44	0.342004	0.215	0.091	7.23278e-39
chr18-3116785-3119669	1.83432e-28	0.345197	0.124	0.033	3.52243e-23
chr4-45413401-45414747	9.9364e-57	0.346165	0.119	0.009	1.90808e-51
chr9-114486643-114488600	3.05124e-49	0.352968	0.172	0.048	5.85927e-44
chr6-50079832-50081396	4.27815e-50	0.353111	0.138	0.027	8.21529e-45
chr6-17554334-17556553	6.76679e-55	0.354463	0.138	0.019	1.29942e-49
chr5-134247860-134249838	4.45941e-45	0.355335	0.135	0.03	8.56336e-40
chr14-25206427-25209118	1.21676e-57	0.357806	0.136	0.019	2.33654e-52
chr8-120641289-120645168	6.92164e-49	0.361924	0.214	0.074	1.32916e-43
chr12-5282598-5285352	3.82347e-48	0.362353	0.126	0.022	7.34217e-43
chr6-85853180-85854909	4.10087e-52	0.3707	0.138	0.023	7.87487e-47
chr11-110438151-110439927	2.27287e-46	0.371419	0.151	0.035	4.36457e-41
chr2-132921256-132924683	5.34263e-67	0.371896	0.276	0.105	1.02594e-61
chr2-121044719-121046213	2.4223e-52	0.372326	0.108	0.01	4.65151e-47
chr14-62503839-62504859	1.87682e-42	0.374471	0.136	0.034	3.60404e-37
chr7-118478766-118482186	6.61528e-64	0.379587	0.213	0.057	1.27033e-58
chr9-87003555-87006177	1.07078e-48	0.381767	0.14	0.027	2.05621e-43
chr3-104794166-104798306	2.75668e-70	0.382231	0.303	0.118	5.29363e-65
chr19-10358919-10360505	1.9092e-60	0.388321	0.139	0.015	3.66622e-55
chr15-27374494-27375970	8.35968e-50	0.388505	0.128	0.021	1.6053e-44
chr15-59830620-59831800	8.76598e-58	0.39897	0.128	0.013	1.68332e-52
chr9-78021256-78023017	2.85049e-67	0.405324	0.149	0.021	5.47376e-62
chr7-136456570-136458767	1.61932e-60	0.41278	0.196	0.044	3.10956e-55
chr6-113444192-113445799	1.0024e-69	0.41943	0.17	0.027	1.92489e-64
chr4-131390909-131395251	2.30225e-90	0.458264	0.346	0.121	4.42099e-85
