# Supplementary material for: Integrative analysis of scRNA-seq and scATAC-seq revealed transit-amplifying thymic epithelial cells expressing autoimmune regulator
Source: eLife. 2022 May 17;11:e73998. doi: 10.7554/eLife.73998 (PMC9113748; doi:10.7554/eLife.73998)
Supplement: Supplementary file 4. [file elife-73998-supp4.xlsx]

## Sheet: Sheet1
	Supplementary File 4. Percentage of scRNA-seq sub-clusters of R1 in scATAC-seq clusters after the integration
			scATAC-seq
	Subcluster in R1	Cluster	0	1	2	3	4	5	6	7	8	9	10	11
		R1A	0.208015	0.0209924	0.00381679	0.00381679	0.706107	0.019084	0.00572519	0	0.0209924	0.00763359	0.0019084	0.0019084	1
		R1B	0.183099	0	0.0140845	0	0.788732	0	0	0	0.0140845	0	0	0	1
		R1C	0.0191083	0.0318471	0.0828025	0	0.847134	0	0	0.00636943	0.0127389	0	0	0	1
		R1D	0.241071	0.0327381	0.0386905	0.00595238	0.642857	0.00297619	0.00297619	0	0.0327381	0	0	0	1
		R1E	0.0900901	0	0.036036	0	0.864865	0	0.00900901	0	0	0	0	0	1
		R1F	0	0	0.285714	0	0.714286	0	0	0	0	0	0	0	1
		R1G	0.12037	0.037037	0.166667	0.037037	0.574074	0.00925926	0	0	0.0185185	0.0277778	0.00925926	0	1
