# Supplementary material for: Integrative analysis of scRNA-seq and scATAC-seq revealed transit-amplifying thymic epithelial cells expressing autoimmune regulator
Source: eLife. 2022 May 17;11:e73998. doi: 10.7554/eLife.73998 (PMC9113748; doi:10.7554/eLife.73998)
Supplement: Supplementary file 5. [file elife-73998-supp5.xlsx]

## Sheet: Sheet1
Supplementary File 5. GO analysis of genes differentially expressed in Venus+ cells
Category	Term	Count	%	PValue	Genes	List Total	Pop Hits	Pop Total	Fold Enrichment	Bonferroni	Benjamini	FDR
GOTERM_BP_DIRECT	GO:0007049~cell cycle	230	11.7347	8.48571e-82	MDC1, SMARCB1, ZAK, CCNF, SMC5, IKZF1, SMC3, MKI67, SMC4, SMC2, CCAR1, CDC20, MTBP, CDC23, RASSF4, CHEK2, CHEK1, RCC1, STRA13, FBXO5, TIPIN, DDX11, KNL1, ESCO2, KNSTRN, HCFC1, PSME3, ZW10, FAM64A, KIF20B, RHNO1, BEX2, ANAPC15, CDCA2, CDCA3, CDCA5, CDCA8, SKA3, GSPT2, NCAPH, SKA1, SKA2, DSN1, CHTF8, RACGAP1, ASUN, RAD21, MCMBP, DDIAS, RCC2, PLK1, CDC7, CDC6, ANLN, TPX2, STAG1, STAG3, SASS6, LIN54,…	1707	614	18082	3.96801	3.32385e-78	3.32385e-78	3.21863e-78
GOTERM_BP_DIRECT	GO:0051301~cell division	158	8.06122	4.42298e-64	ERCC6L, ZWILCH, CCNF, BUB1B, SMC5, SMC3, SMC4, SMC2, CDC20, CDC23, CCND2, CCND1, CHEK2, CDC27, NUSAP1, RCC1, NEK2, STRA13, OIP5, KNTC1, FBXO5, TIPIN, BORA, LIG1, VRK1, KNL1, CDC25C, KNSTRN, CDC25A, CDC25B, CCNE2, CCNE1, ZW10, TIMELESS, ANAPC5, FAM64A, KIF20B, ANAPC1, MAD1L1, CDCA2, ANAPC15, CDCA3, CDCA5, CDCA8, KLHL13, SKA3, PMF1, NCAPH, SKA1, SKA2, CCNB2, SYCE2, DSN1, CCNB1, RACGAP1, ASUN, RAD21…	1707	374	18082	4.47506	1.73248e-60	7.95297e-61	7.7012e-61
GOTERM_BP_DIRECT	GO:0007067~mitotic nuclear division	135	6.88776	6.09112e-64	ERCC6L, ZWILCH, CCNF, BUB1B, SMC5, SMC3, SMC4, SMC2, CDC20, CDC23, CHEK2, NUSAP1, RCC1, NEK2, STRA13, OIP5, KNTC1, FBXO5, TIPIN, BORA, VRK1, KNL1, CDC25C, KNSTRN, CDC25A, CDC25B, ZW10, TIMELESS, SRSF2, ANAPC5, FAM64A, KIF20B, ANAPC1, MAD1L1, CDCA2, ANAPC15, CDCA3, CDCA5, CDCA8, KLHL13, SKA3, PMF1, NCAPH, SKA1, SKA2, CCNB2, DSN1, CCNB1, ASUN, RAD21, MCMBP, NUP88, FAM83D, UBE2C, BOD1, RCC2, PLK1, N…	1707	277	18082	5.16258	2.38589e-60	7.95297e-61	7.7012e-61
GOTERM_BP_DIRECT	GO:0006281~DNA repair	115	5.86735	1.30989e-38	DCLRE1B, MDC1, SMARCB1, ANKLE1, NUDT1, SMC5, SMC6, SMC3, CDC14B, TRIM28, EME1, CHEK2, RUVBL2, CHEK1, STRA13, GEN1, LIG1, RECQL, INIP, NEIL3, MSH3, FANCD2, DNA2, ASF1A, PIF1, RTEL1, BLM, INO80E, PARPBP, PAXIP1, RAD51AP1, BRIP1, NTHL1, RAD21, CLSPN, ATRIP, FANCI, BARD1, XRCC6, FANCM, XRCC5, XRCC2, NONO, FANCA, XRCC1, FANCB, PALB2, FANCG, FANCF, TDP2, UBE2T, CDK2, FAM175A, RAD18, ATR, RAD9A, FEN1, M…	1707	318	18082	3.83075	5.13086e-35	1.28271e-35	1.24211e-35
GOTERM_BP_DIRECT	GO:0006260~DNA replication	69	3.52041	1.13364e-37	FEN1, MCM7, MCMDC2, MCM8, DSCC1, MCM10, BRCA1, CHTF18, CHAF1A, POLE, POLH, RFC5, RFC3, RMI2, RFC4, LIG1, RFC2, RECQL, DNAJC2, DBF4, CINP, MCM3, MCM4, MCM5, MCM6, DNA2, DTL, MCM2, PRIM2, PIF1, INO80E, 2810417H13RIK, RTEL1, BLM, PCNA, PRIM1, NOL8, RECQL4, CDC45, SLX4, ORC6, CHTF8, RBBP4, ORC1, POLD1, POLD2, ORC2, MCMBP, DTD1, GINS1, GINS2, POLQ, RRM1, RRM2, GINS3, GINS4, RPA1, RPA2, CDC6, LRWD1, SS…	1707	123	18082	5.94233	4.44045e-34	8.8809e-35	8.59976e-35
GOTERM_BP_DIRECT	GO:0006974~cellular response to DNA damage stimulus	130	6.63265	1.56538e-35	DCLRE1B, MDC1, SMC5, SMC6, SMC3, ALKBH8, CDC14B, D7ERTD443E, CCND1, EME1, CHEK2, MYC, RUVBL2, CHEK1, STRA13, GEN1, TIPIN, ARMT1, LIG1, DDX11, INIP, WDR76, NEIL3, DDX39B, MSH3, FANCD2, TIMELESS, DNA2, RHNO1, PIF1, RTEL1, BLM, PARPBP, PAXIP1, FBXO45, RAD51AP1, BRIP1, NTHL1, RAD21, CLSPN, CTC1, FANCI, BARD1, XRCC6, FANCM, DDIAS, XRCC5, XRCC2, NONO, FANCA, XRCC1, FANCB, PALB2, FANCG, FANCF, TDP2, TRP…	1707	420	18082	3.27874	6.13159e-32	1.02193e-32	9.8958e-33
GOTERM_BP_DIRECT	GO:0006334~nucleosome assembly	58	2.95918	1.65449e-31	HP1BP3, CHAF1A, HIST1H1D, HIST1H1E, HIST3H2BA, HIST1H1A, HIST1H1B, HIST1H1C, H2AFY, HIST2H2BB, HIST4H4, HIST2H4, HIST1H2BF, HIST1H2BE, HIST1H2BH, HIST1H2BG, HIST1H2BB, HIST1H2BA, ASF1A, MCM2, ASF1B, HIST1H2BN, HIST1H2BM, HIST1H2BP, SET, HIST1H2BJ, HIST1H2BL, HIST1H2BK, CENPA, HIST1H2BQ, HIST1H3A, HIST1H3F, HIST1H3G, HIST1H3H, H1FX, HIST1H3I, HIST1H3B, HIST1H3C, HIST1H3D, HIST1H3E, NPM1, HIST1H4K,…	1707	104	18082	5.90755	6.48062e-28	9.25803e-29	8.96495e-29
GOTERM_BP_DIRECT	GO:0006364~rRNA processing	62	3.16327	1.19499e-29	SUV39H1, POP4, EIF4A3, NAT10, TFB1M, RRP8, RRP9, RPS15, FBL, RPS17, RPS16, RPS19, UTP14A, RRP15, UTP15, WDR36, NSUN5, DIMT1, DIS3, PIH1D1, DDX56, WBP11, UTP18, FTSJ3, EBNA1BP2, CIRH1A, DKC1, MRTO4, NHP2, CCDC86, SKIV2L2, DDX27, NOP2, DDX21, NOL8, RPF1, EMG1, EXOSC10, RNMTL1, ERI1, EXOSC9, EXOSC8, RPL14, GAR1, WBSCR22, UTP20, EXOSC2, EXOSC1, MDN1, NOP14, KRR1, RRP1B, PA2G4, WDR12, NPM3, WDR55, RCL…	1707	126	18082	5.21236	4.68079e-26	5.85099e-27	5.66576e-27
GOTERM_BP_DIRECT	GO:0006397~mRNA processing	101	5.15306	3.53985e-28	ZFP326, GEMIN2, EIF4A3, HNRNPU, TTF2, EFTUD2, PNN, LSM11, SNRPD2, SNRPD1, KHSRP, MAGOH, SNRPD3, METTL3, THOC1, THOC3, WBP11, THOC7, THOC6, RBMXL1, DDX39B, SRSF2, SRSF3, GEMIN5, PPIE, PPIH, SNRPE, GEMIN6, SRSF4, SNRNP25, SNRPF, SRSF6, SRSF7, SNRPA, SNRPB, SRSF9, KHDRBS2, RBM8A, DDX1, CSTF3, CSTF2, HNRNPLL, CSTF1, SMN1, CPSF4, PNPT1, CPSF6, NONO, ALYREF, CPSF3, LSM5, MAGOHB, LSM4, LSM3, LSM2, HNRNP…	1707	322	18082	3.3226	1.38656e-24	1.54062e-25	1.49185e-25
GOTERM_BP_DIRECT	GO:0008380~RNA splicing	84	4.28571	5.21367e-27	ZFP326, GEMIN2, EIF4A3, HNRNPU, TTF2, YBX1, USP39, PRPF19, EFTUD2, PNN, PTBP1, SYNCRIP, SNRPD2, SNRPD1, KHSRP, C1QBP, MAGOH, DHX15, SNRPD3, RBM17, THOC1, THOC3, WBP11, THOC7, THOC6, SFPQ, RBMXL1, DDX39B, HNRNPH1, THRAP3, SRSF2, SRSF3, GEMIN5, PPIE, SNRPE, GEMIN6, PPIH, SRSF4, SNRPA1, SNRNP25, SNRPF, SRSF6, SRSF7, SKIV2L2, SNRPA, SNRPB, SRSF9, SF3B3, RBM8A, SRSF1, DDX20, U2AF1, U2AF2, TRA2B, SNRPB…	1707	241	18082	3.69211	2.04219e-23	2.04219e-24	1.97754e-24
GOTERM_BP_DIRECT	GO:0006335~DNA replication-dependent nucleosome assembly	28	1.42857	1.06265e-22	IPO4, HIST1H3A, CHAF1A, RBBP4, HIST1H3F, HIST1H3G, HIST1H3H, HIST1H3I, HIST1H3B, HIST1H3C, HIST1H3D, HIST1H3E, HIST1H4K, HIST1H4M, HIST1H4N, HIST1H4A, NASP, HIST4H4, HIST2H4, HAT1, HIST1H4H, HIST1H4I, HIST1H4J, HIST1H4C, HIST1H4D, ASF1A, ASF1B, HIST1H4F	1707	33	18082	8.98788	4.16239e-19	3.78399e-20	3.6642e-20
GOTERM_BP_DIRECT	GO:0007059~chromosome segregation	45	2.29592	3.1032e-22	TOP2A, CDCA2, MIS12, HJURP, CTCF, BRCA1, KIF11, SKA3, PMF1, NSL1, SKA1, SKA2, DSN1, SGOL1, RAD21, RCC1, NEK2, NUP43, OIP5, BUB3, BUB1, CDK5RAP2, CENPT, CENPW, SPAG5, NDE1, KNL1, ESCO2, KNSTRN, NDC80, SGOL2A, CENPE, CENPF, STAG1, MIS18A, ESPL1, CENPH, STAG3, INCENP, CENPC1, BIRC5, KIF2C, CENPN, SPC25, NUP37	1707	89	18082	5.35594	1.21553e-18	1.01294e-19	9.80871e-20
GOTERM_BP_DIRECT	GO:0000183~chromatin silencing at rDNA	34	1.73469	1.68987e-20	HDAC2, DNMT1, SUV39H1, RRP8, TAF1D, HIST1H3A, RBBP4, HIST1H3F, DNMT3B, HIST1H3G, HIST1H3H, HIST1H3I, HIST1H3B, HIST1H3C, HIST1H3D, HIST1H3E, H3F3B, HIST1H4K, HIST1H4M, HIST1H4N, SMARCA5, SAP30, HIST1H4A, HIST4H4, POLR1A, POLR1B, HIST2H4, HIST1H4H, POLR1E, HIST1H4I, HIST1H4J, HIST1H4C, HIST1H4D, HIST1H4F	1707	55	18082	6.54831	6.61921e-17	5.0917e-18	4.93051e-18
GOTERM_BP_DIRECT	GO:0032776~DNA methylation on cytosine	25	1.27551	1.02756e-18	DNMT1, UHRF1, HIST1H3A, HIST1H3F, DNMT3B, HIST1H3G, HIST1H3H, HIST1H3I, HIST1H3B, HIST1H3C, HIST1H3D, HIST1H3E, H3F3B, HIST1H4K, HIST1H4M, HIST1H4N, HIST1H4A, HIST4H4, HIST2H4, HIST1H4H, HIST1H4I, HIST1H4J, HIST1H4C, HIST1H4D, HIST1H4F	1707	32	18082	8.27567	4.02497e-15	2.87498e-16	2.78397e-16
GOTERM_BP_DIRECT	GO:0051028~mRNA transport	40	2.04082	8.93492e-18	POM121, ENY2, AHCTF1, NXT1, NUP107, RBM8A, NUP188, SRSF1, EIF4A3, NXT2, AAAS, NUP160, GLE1, XPO1, KHSRP, NUP62, MAGOH, NUP43, NUP88, HNRNPA1, NDC1, EIF5A, HNRNPA3, NUP155, NUP210, NUP133, ALYREF, THOC1, XPO7, THOC3, MAGOHB, THOC7, THOC6, NUP93, DDX39B, HNRNPA2B1, SRSF3, NUP35, SRSF7, NUP37	1707	88	18082	4.81493	3.49981e-14	2.3332e-15	2.25934e-15
GOTERM_BP_DIRECT	GO:0042254~ribosome biogenesis	40	2.04082	1.44308e-17	DDX27, NVL, FASTKD2, NIP7, NOC4L, AATF, SDAD1, IPO4, RPF1, EMG1, IPO9, MTG1, RPS18, C1QBP, ZNHIT6, RRS1, WBSCR22, GAR1, BRIX1, UTP14A, NOP56, NOP14, NOP58, KRR1, DDX56, DDX31, URB2, WDR12, GNL3, FTSJ3, BYSL, RCL1, BOP1, EBNA1BP2, DKC1, MRTO4, NHP2, MPHOSPH10, TSR1, NOP10	1707	89	18082	4.76083	5.65253e-14	3.53283e-15	3.42099e-15
GOTERM_BP_DIRECT	GO:0045815~positive regulation of gene expression, epigenetic	24	1.22449	7.97435e-17	H2AFY, H3F3B, HIST1H4K, CBX3, HIST1H4M, HIST1H4N, HIST1H4A, HIST1H3A, HIST4H4, HIST2H4, HIST1H3F, HIST1H4H, HIST1H3G, HIST1H4I, HIST1H3H, HIST1H4J, HIST1H3I, HIST1H3B, HIST1H4C, HIST1H3C, HIST1H4D, HIST1H3D, HIST1H3E, HIST1H4F	1707	33	18082	7.70389	4.34874e-13	1.83738e-14	1.77922e-14
GOTERM_BP_DIRECT	GO:0006412~translation	92	4.69388	1.24303e-15	RPL4, EIF4A1, GFM1, RPL3, RPL32, MRPS11, PARS2, RPL8, RPL9, MRPL35, YARS2, RPL6, RPS4X, EEF1B2, RBM3, RPS15, SLC25A48, MRPL3, RPS17, RPS16, RPS19, RPS18, RARS, RPL13A-PS1, RPL36, RACK1, RPL35, RPS11, EIF2B1, GM8444, EARS2, PSTK, EIF5A, TSFM, RPS8, RPS5, MRPL49, DARS2, RPSA, AARSD1, MRPS6, EEF1G, SARS2, EEF1D, EIF4E1B, NHP2, SLC25A10, TARS2, EEF1E1, RPL29, SLC25A4, RPL28, RPL23A-PS3, TARSL2, RPL12…	1707	401	18082	2.43028	4.78362e-12	2.70497e-13	2.61933e-13
GOTERM_BP_DIRECT	GO:0000070~mitotic sister chromatid segregation	19	0.969388	6.88545e-15	CEP57, SPAG5, PLK1, MIS12, CDCA8, CENPA, KNSTRN, NSL1, NDC80, CIT, DSN1, KIF18B, ESPL1, CEP57L1, ZW10, NUSAP1, NEK2, BUB3, MAD2L1	1707	23	18082	8.75062	2.69622e-11	1.41949e-12	1.37455e-12
GOTERM_BP_DIRECT	GO:0051290~protein heterotetramerization	26	1.32653	3.75626e-14	HIST1H3A, HIST1H3F, HIST1H3G, PDSS1, HIST1H3H, HIST1H3I, HIST1H3B, HIST1H3C, HIST1H3D, HIST1H3E, RRM1, XRCC6, RRM2, HIST1H4K, HIST1H4M, HIST1H4N, HIST1H4A, HIST4H4, HIST2H4, HIST1H4H, HIST1H4I, HIST1H4J, HIST1H4C, HIST1H4D, FARSB, HIST1H4F	1707	47	18082	5.85988	1.46988e-10	7.35663e-12	7.12374e-12
GOTERM_BP_DIRECT	GO:0006336~DNA replication-independent nucleosome assembly	19	0.969388	8.1336e-14	H3F3B, HIST1H4K, HIST1H4M, HIST1H4N, IPO4, HIST1H4A, NASP, RBBP4, HIST4H4, HIST2H4, HAT1, HIST1H4H, HIST1H4I, HIST1H4J, HIST1H4C, HIST1H4D, ASF1A, ASF1B, HIST1H4F	1707	25	18082	8.05057	3.18763e-10	1.51711e-11	1.46908e-11
GOTERM_BP_DIRECT	GO:0006310~DNA recombination	34	1.73469	3.32192e-13	PIF1, RTEL1, BLM, PAXIP1, HMGB2, SMC5, BRCA1, SMC6, HMGB1, BRCA2, RECQL4, RAD51AP1, PSMC3IP, SLX4, EME1, EXO1, RUVBL2, XRCC6, LIG1, XRCC5, XRCC2, NONO, ACTL6A, H2AFX, RECQL, RPA1, RPA2, MND1, PALB2, UCHL5, RAD51B, RAD51, APEX1, RPA3	1707	85	18082	4.23714	1.30114e-09	5.91453e-11	5.72729e-11
GOTERM_BP_DIRECT	GO:0008033~tRNA processing	33	1.68367	2.03569e-12	TRUB1, TSEN34, OSGEPL1, TSEN15, POP1, DDX1, RPP30, POP4, WDR4, NAT10, OSGEP, THG1L, FBL, TYW1, PUSL1, RPP14, DUS4L, RPP38, SSB, METTL1, NSUN2, ELAC2, PUS1, TYW3, RPP40, ADAT1, TRMT1, QTRTD1, CTU2, LSM6, TRMT6, DUS3L, TRMT61A	1707	85	18082	4.11252	7.97386e-09	3.46687e-10	3.35712e-10
GOTERM_BP_DIRECT	GO:0000398~mRNA splicing, via spliceosome	38	1.93878	3.99421e-12	SF3B3, U2AF1, PRPF19, METTL14, RAVER1, SNRNP70, RBMX2, U2AF2, TRA2B, DHX15, SNRPB2, SRSF10, SF3A3, DDX39, SF3A1, RBM15, SF3A2, NONO, METTL3, LSM5, LSM3, LSM2, HNRNPM, LSM6, PHF5A, NHP2L1, DDX39B, PSPC1, NOVA1, HNRNPA2B1, SNRPG, SNRPE, SNRPA1, PRPF31, SNRPF, SNRPC, SNRPA, SNRPB	1707	112	18082	3.594	1.56455e-08	6.51889e-10	6.31252e-10
GOTERM_BP_DIRECT	GO:0006270~DNA replication initiation	17	0.867347	1.30216e-11	SLF1, MCM7, GINS4, CDC7, MCM10, CDC6, POLA1, CDC45, ORC6, CCNE2, CCNE1, MCM3, MCM4, MCM5, MCM6, TOPBP1, MCM2	1707	24	18082	7.50327	5.10055e-08	2.04022e-09	1.97563e-09
GOTERM_BP_DIRECT	GO:0051276~chromosome organization	21	1.07143	1.77856e-11	CTC1, CENPT, BLM, CENPW, NCAPH2, RPA1, CDCA8, MRE11A, POT1B, SMC3, SMC1A, BRCA2, SMC4, SMC2, SMC1B, SMCHD1, SFPQ, TRP53, MYC, RAD54L, ATR	1707	38	18082	5.85395	6.96664e-08	2.67947e-09	2.59465e-09
GOTERM_BP_DIRECT	GO:0032259~methylation	47	2.39796	2.28764e-11	SUV39H2, DNMT1, CARNMT1, SUV39H1, SETD6, NOP2, PRDM5, THUMPD2, TYMS, TFB1M, RRP8, SPOUT1, ALKBH8, FBL, EMG1, METTL14, METTL13, RNMTL1, SMYD2, WBSCR22, EEF2KMT, DNMT3B, METTL5, WHSC1, METTL16, METTL18, TRMT10A, PRMT5, ARMT1, PRMT7, NSUN5, DIMT1, METTL1, PRMT1, METTL2, NSUN2, TYW3, METTL3, PRMT3, TRMT1, FTSJ3, METTL22, MTAP, METTL25, CARM1, TRMT61A, EZH2	1707	169	18082	2.94594	8.96067e-08	3.31877e-09	3.21371e-09
GOTERM_BP_DIRECT	GO:0000462~maturation of SSU-rRNA from tricistronic rRNA transcript (SSU-rRNA, 5.8S rRNA, LSU-rRNA)	18	0.918367	2.69067e-11	KRR1, RPS8, WDR3, MRPS11, NGDN, HEATR1, NOC4L, PWP2, WDR46, UTP18, DIEXF, BYSL, EMG1, TBL3, RPS16, RPS19, TSR1, UTP20	1707	28	18082	6.80969	1.05394e-07	3.76406e-09	3.6449e-09
GOTERM_BP_DIRECT	GO:0000387~spliceosomal snRNP assembly	17	0.867347	7.82515e-11	PRMT5, PRMT7, GEMIN2, DDX20, LSM4, SNRPD2, SNRPD1, CLNS1A, SNRPG, GEMIN5, SNRPE, GEMIN6, SNRPD3, SMN1, SNRPF, SNRPC, SNRPB	1707	26	18082	6.9261	3.06511e-07	1.05694e-08	1.02348e-08
GOTERM_BP_DIRECT	GO:0048025~negative regulation of mRNA splicing, via spliceosome	16	0.816327	5.16269e-10	NPM1, HNRNPL, PTBP1, RBMXL1, U2AF2, PCBP4, C1QBP, TRA2B, HNRNPA2B1, SRSF4, RNPS1, SRSF6, SRSF7, SRSF10, RBM10, SRSF9	1707	25	18082	6.77943	2.02222e-06	6.74075e-08	6.52736e-08
GOTERM_BP_DIRECT	GO:0006302~double-strand break repair	25	1.27551	8.7456e-10	EXD2, CDCA5, DDX1, BRCA1, BRCA2, RECQL4, MTA1, EME1, CHEK2, RAD21, RAD54L, POLQ, XRCC6, PARP1, LIG1, XRCC5, SMARCA5, MRE11A, MND1, ESCO2, TDP2, TRP53, FAM175A, APLF, TRIP13	1707	63	18082	4.20351	3.42565e-06	1.10505e-07	1.07007e-07
GOTERM_BP_DIRECT	GO:0045653~negative regulation of megakaryocyte differentiation	13	0.663265	1.8913e-09	HIST1H4K, PRMT1, HIST1H4M, HIST1H4N, HIST1H4A, HIST4H4, HIST2H4, HIST1H4H, HIST1H4I, HIST1H4J, HIST1H4C, HIST1H4D, HIST1H4F	1707	17	18082	8.10042	7.40818e-06	2.31507e-07	2.24178e-07
GOTERM_BP_DIRECT	GO:0007052~mitotic spindle organization	16	0.816327	4.49446e-09	GPSM2, STIL, WDR62, SMC3, TUBG1, AURKB, NDC80, AURKA, CCNB1, KIF2A, ASUN, STMN1, POC1A, RCC1, PCNT, SPC25	1707	28	18082	6.05306	1.76046e-05	5.33478e-07	5.1659e-07
GOTERM_BP_DIRECT	GO:1904874~positive regulation of telomerase RNA localization to Cajal body	12	0.612245	4.88039e-09	CCT6A, CCT3, CCT2, DKC1, RUVBL2, TCP1, NHP2, CCT8, CCT7, CCT5, NOP10, CCT4	1707	15	18082	8.47428	1.91163e-05	5.62249e-07	5.4445e-07
GOTERM_BP_DIRECT	GO:0006342~chromatin silencing	24	1.22449	5.15974e-09	HELLS, HIST1H2AL, HIST1H2AO, HIST1H2AN, H2AFY, HIST1H2AI, HIST1H2AH, H2AFZ, HIST1H2AK, SUV39H1, H2AFX, HIST2H2AB, H2AFV, MSL3, HIST1H2AP, HIST2H2AC, H2AFY2, HIST1H2AE, HIST1H2AD, HIST1H2AG, HIST1H2AF, HIST1H2AA, HIST1H2AC, HIST1H2AB	1707	63	18082	4.03537	2.02105e-05	5.77449e-07	5.59168e-07
GOTERM_BP_DIRECT	GO:0006284~base-excision repair	18	0.918367	8.70316e-09	POLQ, FEN1, LIG1, PARP1, PARP2, HMGA1, RPA1, XRCC1, RPA2, HMGB1, RECQL4, NEIL3, NTHL1, TDG, APEX1, RPA3, DNA2, MUTYH	1707	37	18082	5.15328	3.40897e-05	9.46953e-07	9.16975e-07
GOTERM_BP_DIRECT	GO:0006406~mRNA export from nucleus	18	0.918367	1.43656e-08	EIF5A, DDX39, ENY2, NUP107, NUP155, NUP133, THOC1, THOC3, NUP160, THOC7, THOC6, GLE1, DDX39B, RBMX2, SARNP, HNRNPA2B1, NUP88, SRSF10	1707	38	18082	5.01767	5.62687e-05	1.52082e-06	1.47267e-06
GOTERM_BP_DIRECT	GO:0000724~double-strand break repair via homologous recombination	24	1.22449	2.766e-08	GEN1, EXD2, BLM, MCM8, XRCC2, H2AFX, RECQL, RPA1, RPA2, SMC5, NUCKS1, SMC6, BRCA1, BRCA2, PALB2, RAD54B, RAD51AP1, RAD51B, MMS22L, SFPQ, SLX4, RAD51, RPA3, RAD54L	1707	68	18082	3.73865	0.000108338	2.85117e-06	2.76091e-06
GOTERM_BP_DIRECT	GO:0000082~G1/S transition of mitotic cell cycle	22	1.12245	1.07423e-07	CDKN2D, TCF19, RANBP1, CDKN1B, CDKN2C, CDCA5, IQGAP3, CDC25A, CCND2, CCNE2, CCND1, CDK4, CCNE1, MYB, CDK2, RCC1, ANP32B, SKP2, E2F5, EIF4E, POLE, CDKN3	1707	62	18082	3.75875	0.000420687	1.07891e-05	1.04476e-05
GOTERM_BP_DIRECT	GO:0007080~mitotic metaphase plate congression	16	0.816327	1.28813e-07	CDCA5, KIFC5B, KIF14, CDCA8, KIF22, CENPE, KIF18A, CCNB1, PSRC1, CDC23, KIFC1, ZW10, RRS1, KIF2C, SPDL1, KPNB1	1707	34	18082	4.98487	0.000504435	1.2614e-05	1.22147e-05
GOTERM_BP_DIRECT	GO:0034501~protein localization to kinetochore	9	0.459184	2.33834e-07	MTBP, ZW10, MIS12, CDK1, BUB1B, TTK, SPDL1, KNL1, AURKB	1707	10	18082	9.53357	0.000915508	2.23397e-05	2.16325e-05
GOTERM_BP_DIRECT	GO:0007051~spindle organization	11	0.561224	2.56172e-07	RANBP1, ASPM, SPAG5, CEP72, AUNIP, KIF11, PCNT, KNSTRN, CKAP5, AURKB, AURKA	1707	16	18082	7.28259	0.00100292	2.38911e-05	2.31348e-05
GOTERM_BP_DIRECT	GO:0060968~regulation of gene silencing	10	0.510204	2.92024e-07	HIST1H3A, CDK2, HIST1H3F, HIST1H3G, HIST1H3H, HIST1H3I, HIST1H3B, HIST1H3C, HIST1H3D, HIST1H3E	1707	13	18082	8.14835	0.0011432	2.66013e-05	2.57592e-05
GOTERM_BP_DIRECT	GO:1904871~positive regulation of protein localization to Cajal body	8	0.408163	4.83165e-07	CCT6A, CCT3, CCT2, TCP1, CCT8, CCT7, CCT5, CCT4	1707	8	18082	10.5929	0.00189077	4.20568e-05	4.07254e-05
GOTERM_BP_DIRECT	GO:1900264~positive regulation of DNA-directed DNA polymerase activity	8	0.408163	4.83165e-07	RFC5, NPM1, RFC3, CHTF8, RFC4, RFC2, DSCC1, CHTF18	1707	8	18082	10.5929	0.00189077	4.20568e-05	4.07254e-05
GOTERM_BP_DIRECT	GO:0006352~DNA-templated transcription, initiation	16	0.816327	4.94451e-07	HIST1H4K, HIST1H4M, HIST1H4N, SMARCA5, HIST1H4A, HIST4H4, MYC, HIST2H4, HIST1H4H, TCF4, HIST1H4I, TAF5, HIST1H4J, HIST1H4C, HIST1H4D, HIST1H4F	1707	37	18082	4.58069	0.00193489	4.21035e-05	4.07707e-05
GOTERM_BP_DIRECT	GO:0006396~RNA processing	23	1.17347	5.48227e-07	TRUB1, WDHD1, SF3A1, PNPT1, SSB, DHX9, CSTF3, ADAT1, LARP7, WBP11, LSM4, RCL1, FBL, EXOSC10, HNRNPUL1, RNMTL1, SNRPD1, DKC1, EXOSC9, EXOSC8, DHX37, SNRPD3, EXOSC1	1707	73	18082	3.33747	0.0021451	4.56894e-05	4.4243e-05
GOTERM_BP_DIRECT	GO:0000723~telomere maintenance	16	0.816327	7.4582e-07	CTC1, DCLRE1B, PIF1, XRCC6, BLM, RTEL1, PARP1, XRCC5, RPA1, RPA2, TERF1, CCNE2, CCNE1, APEX1, OBFC1, DNA2	1707	38	18082	4.46015	0.00291711	6.0862e-05	5.89353e-05
GOTERM_BP_DIRECT	GO:0032508~DNA duplex unwinding	11	0.561224	1.17221e-06	RECQL4, GINS2, PIF1, XRCC6, RTEL1, XRCC5, DDX1, DDX11, GINS4, RECQL, MRE11A	1707	18	18082	6.47341	0.00458103	9.18311e-05	8.8924e-05
GOTERM_BP_DIRECT	GO:0006298~mismatch repair	11	0.561224	1.17221e-06	PCNA, RNASEH2A, MSH3, EXO1, TDG, RPA3, RPA1, RPA2, PMS2, MLH1, PMS1	1707	18	18082	6.47341	0.00458103	9.18311e-05	8.8924e-05
GOTERM_BP_DIRECT	GO:0016569~covalent chromatin modification	51	2.60204	1.67076e-06	SUV39H2, SMARCB1, SUV39H1, KDM8, PRDM5, DPY30, SGF29, CTCF, IKZF1, RRP8, HMGN5, TRIM28, RUVBL2, WDR5, WHSC1, PRMT5, PBRM1, SMARCC1, PRMT7, H2AFY, EED, ACTL6A, MSL3, TET1, HCFC1, DNAJC2, RBL1, ASF1A, ASF1B, SMARCD1, ENY2, HDAC2, DNMT1, L3MBTL2, UHRF1, RBBP4, TDG, SMYD2, WBSCR22, BRD8, CBX3, 0610010K14RIK, SMARCA5, LRWD1, DEK, ASXL1, H2AFY2, CARM1, FAM175A, ANP32E, EZH2	1707	266	18082	2.03096	0.006523	0.000128321	0.000124259
GOTERM_BP_DIRECT	GO:0051382~kinetochore assembly	8	0.408163	1.99566e-06	CENPT, CENPW, APITD1, CENPH, MIS12, CENPC1, STRA13, CENPA	1707	9	18082	9.41587	0.00778654	0.000147491	0.000142822
GOTERM_BP_DIRECT	GO:1904851~positive regulation of establishment of protein localization to telomere	8	0.408163	1.99566e-06	CCT6A, CCT2, DKC1, TCP1, CCT8, CCT7, CCT5, CCT4	1707	9	18082	9.41587	0.00778654	0.000147491	0.000142822
GOTERM_BP_DIRECT	GO:0032212~positive regulation of telomere maintenance via telomerase	14	0.714286	2.79593e-06	CCT3, CCT2, AURKB, CCT6A, DKC1, TCP1, OBFC1, NEK2, CCT8, CCT7, HNRNPA1, CCT5, ATR, CCT4	1707	32	18082	4.63437	0.0108919	0.000202809	0.000196388
GOTERM_BP_DIRECT	GO:0006606~protein import into nucleus	20	1.02041	3.17277e-06	RANBP1, POM121, NUP107, NUP155, NUP188, NUP133, CSE1L, NUP153, NUTF2, HIKESHI, IPO7, NUP93, IPO9, SIX2, NUP62, NUP88, KPNA2, TNPO3, KPNB1, RAN	1707	63	18082	3.36281	0.0123508	0.000225959	0.000218805
GOTERM_BP_DIRECT	GO:0006261~DNA-dependent DNA replication	10	0.510204	3.58963e-06	RFC5, POLQ, RFC3, ORC6, RFC4, RFC2, POLD1, POLE2, POLD2, MCMBP	1707	16	18082	6.62053	0.0139622	0.000242424	0.000234749
GOTERM_BP_DIRECT	GO:0007099~centriole replication	10	0.510204	3.58963e-06	PLK4, CEP135, CENPJ, CEP152, CDK2, SASS6, CEP72, WDR62, CNTROB, CDK5RAP2	1707	16	18082	6.62053	0.0139622	0.000242424	0.000234749
GOTERM_BP_DIRECT	GO:0007062~sister chromatid cohesion	10	0.510204	3.58963e-06	DDX11, RAD21, MCMBP, MRE11A, SMC5, KIF22, SMC1A, SMC3, PHB2, SMC1B	1707	16	18082	6.62053	0.0139622	0.000242424	0.000234749
GOTERM_BP_DIRECT	GO:0042273~ribosomal large subunit biogenesis	12	0.612245	3.99093e-06	BOP1, EBNA1BP2, NPM1, NOP16, NIP7, RRS1, RPL14, WDR74, NOC2L, SDAD1, NLE1, WDR55	1707	24	18082	5.29643	0.015511	0.000260541	0.000252293
GOTERM_BP_DIRECT	GO:0031297~replication fork processing	12	0.612245	3.99093e-06	MMS22L, BLM, RTEL1, RAD51, APITD1, PCNA, EME1, FANCM, DDX11, THOC1, STRA13, NUCKS1	1707	24	18082	5.29643	0.015511	0.000260541	0.000252293
GOTERM_BP_DIRECT	GO:0001649~osteoblast differentiation	28	1.42857	4.68197e-06	CBFB, DHX9, DDX21, HNRNPU, PHB, RPS15, SYNCRIP, FBL, GJA1, FIGNL1, RACK1, BCAP29, RPS11, WWTR1, ACTN3, TPM4, H3F3B, IFT80, HSPE1, RSL1D1, SFRP1, RBMXL1, MYBBP1A, SMO, ERH, IARS, RBMX, ASF1A	1707	113	18082	2.62478	0.0181722	0.000300644	0.000291126
GOTERM_BP_DIRECT	GO:0051225~spindle assembly	13	0.663265	5.38883e-06	HAUS4, HAUS3, HAUS6, HAUS5, KIF11, HAUS1, TPX2, TUBB5, HAUS8, HAUS7, RCC1, CEP192, FBXO5	1707	29	18082	4.74852	0.0208869	0.000340453	0.000329675
GOTERM_BP_DIRECT	GO:0050821~protein stabilization	30	1.53061	6.52871e-06	WIZ, PHB, PHB2, HSPD1, D7ERTD443E, IPO9, TMEM88, CHEK2, FLNA, MSX1, CCT8, CCT7, CCT5, CCT4, ZBED3, CCT3, WNT10B, CCT2, NPM1, CRTAP, HCFC1, CCT6A, SMO, TRP53, TCP1, PIN1, NAA15, TCF3, PFN1, TELO2	1707	128	18082	2.4827	0.0252488	0.000399577	0.000386928
GOTERM_BP_DIRECT	GO:0006457~protein folding	30	1.53061	6.52871e-06	GM5160, FKBP2, HSPD1, TUBA1B, TUBB5, NUDCD2, CCT8, CCT7, CCT5, CCT4, HSPA9, CCT3, CCT2, TRAP1, PPIL1, HSP90AA1, HSPE1, CCT6A, TCP1, FKBP7, PPIE, STUB1, PPIH, FKBP4, FKBP3, PPIA, PFDN6, PPID, FKBP5, PPIC	1707	128	18082	2.4827	0.0252488	0.000399577	0.000386928
GOTERM_BP_DIRECT	GO:0000077~DNA damage checkpoint	13	0.663265	8.21171e-06	TIPIN, ZAK, H2AFX, CHEK2, CHEK1, E2F1, RAD1, CLSPN, TRP53BP1, ATRIP, RAD9A, ATR, RHNO1	1707	30	18082	4.59024	0.0316536	0.000494851	0.000479185
GOTERM_BP_DIRECT	GO:0090307~mitotic spindle assembly	14	0.714286	9.06878e-06	TUBGCP2, KIFC5B, KIF11, CDC20, TPX2, KIF2A, KIFC1, CHEK2, FLNA, BIRC5, MYBL2, TUBGCP3, NEK2, KPNB1	1707	35	18082	4.23714	0.034899	0.000538218	0.00052118
GOTERM_BP_DIRECT	GO:0000027~ribosomal large subunit assembly	12	0.612245	1.03373e-05	RPL3, GM10036, RPL12, MRTO4, PPAN, BRIX1, RPF2, RPL6L, MDN1, RPL6, MRPL11, RPF1	1707	26	18082	4.88901	0.0396827	0.000604348	0.000585216
GOTERM_BP_DIRECT	GO:0007019~microtubule depolymerization	9	0.459184	1.10251e-05	NEDD1, KIF18A, KIF18B, NCKAP5L, STMN1, KIF14, KIF24, KIF2C, SMN1	1707	14	18082	6.80969	0.0422662	0.000635075	0.000614971
GOTERM_BP_DIRECT	GO:0051298~centrosome duplication	11	0.561224	1.21588e-05	STIL, TUBGCP2, NDE1, CENPJ, CEP152, SASS6, TUBGCP3, CEP192, BRCA1, BRCA2, CKAP5	1707	22	18082	5.29643	0.0465099	0.000690231	0.000668381
GOTERM_BP_DIRECT	GO:0007094~mitotic spindle assembly checkpoint	10	0.510204	1.28028e-05	CENPE, ZW10, PLK1, BUB1B, CEP192, PSMG2, BUB3, BUB1, MAD1L1, MAD2L1	1707	18	18082	5.88492	0.0489122	0.000716408	0.000693729
