# Supplementary material for: Integrative analysis of scRNA-seq and scATAC-seq revealed transit-amplifying thymic epithelial cells expressing autoimmune regulator
Source: eLife. 2022 May 17;11:e73998. doi: 10.7554/eLife.73998 (PMC9113748; doi:10.7554/eLife.73998)
Supplement: Supplementary file 6. [file elife-73998-supp6.xlsx]

## Sheet: TSA
Supplementary File 6. List of all, Aire-dependent, Aire-independent tissue specific antigen genes
All TSAs	Aire-dep TSAs	Aire-indep TSAs
0610009L18Rik	0610012H03Rik	0610009L18Rik
1110004E09Rik	1110006G14Rik	1110004E09Rik
1110008L16Rik	1110017D15Rik	1110008L16Rik
1110021J02Rik	1110017F19Rik	1110021J02Rik
1110032F04Rik	1110032A04Rik	1110032F04Rik
1110034A24Rik	1300002K09Rik	1110034A24Rik
1110034G24Rik	1500009C09Rik	1110034G24Rik
1110059M19Rik	1500015O10Rik	1110059M19Rik
1190005I06Rik	1600014K23Rik	1190005I06Rik
1200009I06Rik	1700001C02Rik	1200009I06Rik
1300017J02Rik	1700001F09Rik	1300017J02Rik
1500002C15Rik	1700001L19Rik	1500002C15Rik
1500002O20Rik	1700003E16Rik	1500002O20Rik
1500011B03Rik	1700003E24Rik	1500011B03Rik
1600002H07Rik	1700003F12Rik	1600002H07Rik
1600012P17Rik	1700003M02Rik	1600012P17Rik
1600015I10Rik	1700006A11Rik	1600015I10Rik
1600016N20Rik	1700006E09Rik	1600016N20Rik
1600027N09Rik	1700007I08Rik	1600027N09Rik
1700001C19Rik	1700007K09Rik	1700001C19Rik
1700001J11Rik	1700007K13Rik	1700001J11Rik
1700001K19Rik	1700008A04Rik	1700001K19Rik
1700001L05Rik	1700008I05Rik	1700001L05Rik
1700001O22Rik	1700008P02Rik	1700001O22Rik
1700001P01Rik	1700008P20Rik	1700001P01Rik
1700007B14Rik	1700009N14Rik	1700007B14Rik
1700007G11Rik	1700010D01Rik	1700007G11Rik
1700008F21Rik	1700010I14Rik	1700008F21Rik
1700008O03Rik	1700011A15Rik	1700008O03Rik
1700009P17Rik	1700011E24Rik	1700009P17Rik
1700010B08Rik	1700011F03Rik	1700010B08Rik
1700010M22Rik	1700011F14Rik	1700010M22Rik
1700012L04Rik	1700011H14Rik	1700012L04Rik
1700013F07Rik	1700011I03Rik	1700013F07Rik
1700013G24Rik	1700011L22Rik	1700013G24Rik
1700013N18Rik	1700011M02Rik	1700013N18Rik
1700019L03Rik	1700012A03Rik	1700019L03Rik
1700019N12Rik	1700012A16Rik	1700019N12Rik
1700020A23Rik	1700012B07Rik	1700020A23Rik
1700021C14Rik	1700012B09Rik	1700021C14Rik
1700024N20Rik	1700012P22Rik	1700024N20Rik
1700025K23Rik	1700013D24Rik	1700025K23Rik
1700026D08Rik	1700013H16Rik	1700026D08Rik
1700027A23Rik	1700015E13Rik	1700027A23Rik
1700029F12Rik	1700015F17Rik	1700029F12Rik
1700029G01Rik	1700016C15Rik	1700029G01Rik
1700029H14Rik	1700016H13Rik	1700029H14Rik
1700029I15Rik	1700016K19Rik	1700029I15Rik
1700029J07Rik	1700016M24Rik	1700029J07Rik
1700029J11Rik	1700017D01Rik	1700029J11Rik
1700030J22Rik	1700017G19Rik	1700030J22Rik
1700030K09Rik	1700017N19Rik	1700030K09Rik
1700034F02Rik	1700018B08Rik	1700034F02Rik
1700034H15Rik	1700018B24Rik	1700034H15Rik
1700034I23Rik	1700018C11Rik	1700034I23Rik
1700034J05Rik	1700018F24Rik	1700034J05Rik
1700037C18Rik	1700018L24Rik	1700037C18Rik
1700040L02Rik	1700019A02Rik	1700040L02Rik
1700042B14Rik	1700019B03Rik	1700042B14Rik
1700048O20Rik	1700019G17Rik	1700048O20Rik
1700049G17Rik	1700019M22Rik	1700049G17Rik
1700054N08Rik	1700019N19Rik	1700054N08Rik
1700056E22Rik	1700020C07Rik	1700056E22Rik
1700067K01Rik	1700020N15Rik	1700067K01Rik
1700088E04Rik	1700021F07Rik	1700088E04Rik
1700093K21Rik	1700023A16Rik	1700093K21Rik
1700094D03Rik	1700023E05Rik	1700094D03Rik
1700102P08Rik	1700024B05Rik	1700102P08Rik
1700109H08Rik	1700024P04Rik	1700109H08Rik
1700110I01Rik	1700025E21Rik	1700110I01Rik
1700113H08Rik	1700025F22Rik	1700113H08Rik
1700120B22Rik	1700026J04Rik	1700120B22Rik
1700123L14Rik	1700026L06Rik	1700123L14Rik
1700125D06Rik	1700027D21Rik	1700125D06Rik
1700128F08Rik	1700028I16Rik	1700128F08Rik
1700129C05Rik	1700028J19Rik	1700129C05Rik
1810032O08Rik	1700028P14Rik	1810032O08Rik
1810041L15Rik	1700029P11Rik	1810041L15Rik
1810049H13Rik	1700030F18Rik	1810049H13Rik
1810063B07Rik	1700034E13Rik	1810063B07Rik
2010001E11Rik	1700034O15Rik	2010001E11Rik
2010002M12Rik	1700042G07Rik	2010002M12Rik
2010003K11Rik	1700054O13Rik	2010003K11Rik
2010007H06Rik	1700057G04Rik	2010007H06Rik
2010109A12Rik	1700057K13Rik	2010109A12Rik
2010317E24Rik	1700061G19Rik	2010317E24Rik
2200002D01Rik	1700061I17Rik	2200002D01Rik
2200002J24Rik	1700061J05Rik	2200002J24Rik
2210415F13Rik	1700063H04Rik	2210415F13Rik
2210418O10Rik	1700065I17Rik	2210418O10Rik
2310002L09Rik	1700067P10Rik	2310002L09Rik
2310003H01Rik	1700072E05Rik	2310003H01Rik
2310007L24Rik	1700074P13Rik	2310007L24Rik
2310010M20Rik	1700080E11Rik	2310010M20Rik
2310014L17Rik	1700080O16Rik	2310014L17Rik
2310022A10Rik	1700086L19Rik	2310022A10Rik
2310028H24Rik	1700090G07Rik	2310028H24Rik
2410002O22Rik	1700091H14Rik	2410002O22Rik
2410076I21Rik	1700101I19Rik	2410076I21Rik
2510046G10Rik	1700104B16Rik	2510046G10Rik
2510049J12Rik	1700106J16Rik	2510049J12Rik
2610002D18Rik	1700108M19Rik	2610002D18Rik
2610020H08Rik	1700110M21Rik	2610020H08Rik
2610021K21Rik	1700112E06Rik	2610021K21Rik
2610027L16Rik	1700123I01Rik	2610027L16Rik
2700049A03Rik	1700123K08Rik	2700049A03Rik
2810021J22Rik	1700125H20Rik	2810021J22Rik
2810025M15Rik	1810009J06Rik	2810025M15Rik
3010026O09Rik	1810011H11Rik	3010026O09Rik
3110007F17Rik	1810030J14Rik	3110007F17Rik
3110021A11Rik	1810033B17Rik	3110021A11Rik
3110070M22Rik	1810065E05Rik	3110070M22Rik
3110082D06Rik	2010001M09Rik	3110082D06Rik
3110082I17Rik	2010106E10Rik	3110082I17Rik
3830403N18Rik	2010107G12Rik	3830403N18Rik
4430402I18Rik	2010109I03Rik	4430402I18Rik
4632404H12Rik	2010110P09Rik	4632404H12Rik
4632415K11Rik	2010300C02Rik	4632415K11Rik
4632434I11Rik	2200002K05Rik	4632434I11Rik
4732415M23Rik	2210010C04Rik	4732415M23Rik
4832428D23Rik	2210010C17Rik	4832428D23Rik
4833423E24Rik	2210407C18Rik	4833423E24Rik
4833424O15Rik	2310002J15Rik	4833424O15Rik
4921507P07Rik	2310002L13Rik	4921507P07Rik
4921515J06Rik	2310005G13Rik	4921515J06Rik
4921517D21Rik	2310007B03Rik	4921517D21Rik
4921517D22Rik	2310015B20Rik	4921517D22Rik
4921522P10Rik	2310033E01Rik	4921522P10Rik
4921539E11Rik	2310042D19Rik	4921539E11Rik
4930403N07Rik	2310043J07Rik	4930403N07Rik
4930404A10Rik	2310046A06Rik	4930404A10Rik
4930415F15Rik	2310050C09Rik	4930415F15Rik
4930430A15Rik	2310057J18Rik	4930430A15Rik
4930433N12Rik	2310057N15Rik	4930433N12Rik
4930444G20Rik	2410066E13Rik	4930444G20Rik
4930447C04Rik	2610034M16Rik	4930447C04Rik
4930451I11Rik	2610318N02Rik	4930451I11Rik
4930452B06Rik	2610528J11Rik	4930452B06Rik
4930455F23Rik	2810007J24Rik	4930455F23Rik
4930473A06Rik	2810030E01Rik	4930473A06Rik
4930474N05Rik	2810453I06Rik	4930474N05Rik
4930511I11Rik	2810459M11Rik	4930511I11Rik
4930511M11Rik	2900006K08Rik	4930511M11Rik
4930513O06Rik	2900011O08Rik	4930513O06Rik
4930524B15Rik	2900055J20Rik	4930524B15Rik
4930524J08Rik	2900092C05Rik	4930524J08Rik
4930528F23Rik	3110035E14Rik	4930528F23Rik
4930529M08Rik	3110039M20Rik	4930529M08Rik
4930534B04Rik	3110047P20Rik	4930534B04Rik
4930539E08Rik	3830417A13Rik	4930539E08Rik
4930542C12Rik	3830431G21Rik	4930542C12Rik
4930544G11Rik	4833427G06Rik	4930544G11Rik
4930544O15Rik	4833442J19Rik	4930544O15Rik
4930550C14Rik	4921501E09Rik	4930550C14Rik
4930562F07Rik	4921504E06Rik	4930562F07Rik
4930571K23Rik	4921510H08Rik	4930571K23Rik
4930578N16Rik	4921511H03Rik	4930578N16Rik
4930579C15Rik	4921513D11Rik	4930579C15Rik
4930579G22Rik	4921524L21Rik	4930579G22Rik
4931428L18Rik	4921528I07Rik	4931428L18Rik
4931429L15Rik	4921528O07Rik	4931429L15Rik
4932414N04Rik	4921530L21Rik	4932414N04Rik
4932425I24Rik	4921536K21Rik	4932425I24Rik
4932442L08Rik	4922501L14Rik	4932442L08Rik
4933403G14Rik	4922502D21Rik	4933403G14Rik
4933405L10Rik	4922505E12Rik	4933405L10Rik
4933406P04Rik	4930402K13Rik	4933406P04Rik
4933409K07Rik	4930404H21Rik	4933409K07Rik
4933411K16Rik	4930407I10Rik	4933411K16Rik
4933411K20Rik	4930408F14Rik	4933411K20Rik
4933413G19Rik	4930412D23Rik	4933413G19Rik
4933425O20Rik	4930412F15Rik	4933425O20Rik
4933428M09Rik	4930412O13Rik	4933428M09Rik
4933430H15Rik	4930415O20Rik	4933430H15Rik
4933432B09Rik	4930432K09Rik	4933432B09Rik
4933433C11Rik	4930432K21Rik	4933433C11Rik
4933437F05Rik	4930435E12Rik	4933437F05Rik
4933440N22Rik	4930438A08Rik	4933440N22Rik
5033411D12Rik	4930443G12Rik	5033411D12Rik
5430407P10Rik	4930444P10Rik	5430407P10Rik
5430427O19Rik	4930447F04Rik	5430427O19Rik
5430435G22Rik	4930449I24Rik	5430435G22Rik
5730460C07Rik	4930451G09Rik	5730460C07Rik
5730494M16Rik	4930468A15Rik	5730494M16Rik
5730528L13Rik	4930471M23Rik	5730528L13Rik
5730559C18Rik	4930486L24Rik	5730559C18Rik
5730590G19Rik	4930502E18Rik	5730590G19Rik
5830415F09Rik	4930503B20Rik	5830415F09Rik
5830418K08Rik	4930503L19Rik	5830418K08Rik
6030468B19Rik	4930504O13Rik	6030468B19Rik
6230409E13Rik	4930505A04Rik	6230409E13Rik
6330416G13Rik	4930519F16Rik	6330416G13Rik
6330439K17Rik	4930519G04Rik	6330439K17Rik
6430531B16Rik	4930521A18Rik	6430531B16Rik
6430573F11Rik	4930522H14Rik	6430573F11Rik
6430598A04Rik	4930524N10Rik	6430598A04Rik
6530418L21Rik	4930525F21Rik	6530418L21Rik
8030462N17Rik	4930526D03Rik	8030462N17Rik
9030625A04Rik	4930542N07Rik	9030625A04Rik
9130014G24Rik	4930547C10Rik	9130014G24Rik
9130017N09Rik	4930548H24Rik	9130017N09Rik
9430015G10Rik	4930549C01Rik	9430015G10Rik
9930013L23Rik	4930550L24Rik	9930013L23Rik
9930023K05Rik	4930553M12Rik	9930023K05Rik
A130010J15Rik	4930555I21Rik	A130010J15Rik
A2ld1	4930557A04Rik	A2ld1
A330008L17Rik	4930558K02Rik	A330008L17Rik
A430093F15Rik	4930562C15Rik	A430093F15Rik
A4galt	4930563D23Rik	A4galt
A4gnt	4930568D16Rik	A4gnt
A530088E08Rik	4930578I06Rik	A530088E08Rik
A630001G21Rik	4930579F01Rik	A630001G21Rik
A630033H20Rik	4930583H14Rik	A630033H20Rik
A630095E13Rik	4930584F24Rik	A630095E13Rik
A730017C20Rik	4931407G18Rik	A730017C20Rik
A830010M20Rik	4931408A02Rik	A830010M20Rik
A830018L16Rik	4931417E11Rik	A830018L16Rik
A930003A15Rik	4931417G12Rik	A930003A15Rik
A930018P22Rik	4931423N10Rik	A930018P22Rik
A930033H14Rik	4931431F19Rik	A930033H14Rik
AA386476	4931440L10Rik	AA386476
AF366264	4932411G14Rik	AF366264
AI317395	4932418E24Rik	AI317395
AI429214	4932431P20Rik	AI429214
AI480653	4933400A11Rik	AI480653
AI607873	4933402E13Rik	AI607873
AI747448	4933402J07Rik	AI747448
AI836003	4933402N03Rik	AI836003
AI846148	4933402N22Rik	AI846148
AK129341	4933404M02Rik	AK129341
AW011738	4933411G06Rik	AW011738
Aadat	4933412E24Rik	Aadat
Aak1	4933414I15Rik	Aak1
Aars2	4933415F23Rik	Aars2
Aass	4933416C03Rik	Aass
Abca2	4933421I07Rik	Abca2
Abca8b	4933422H20Rik	Abca8b
Abcb10	4933425L06Rik	Abcb10
Abcb1a	4933427E11Rik	Abcb1a
Abcb1b	4933427G17Rik	Abcb1b
Abcc12	4933430I17Rik	Abcc12
Abcc8	4933434I20Rik	Abcc8
Abcd2	4933436C20Rik	Abcd2
Abcg5	4933436I01Rik	Abcg5
Abhd15	4933440M02Rik	Abhd15
Abi3	5031410I06Rik	Abi3
Abp1	5033430I15Rik	Abp1
Abtb1	5430419D17Rik	Abtb1
Acacb	5430421N21Rik	Acacb
Acad10	5830403L16Rik	Acad10
Acad12	6030405A18Rik	Acad12
Acap3	6330403A02Rik	Acap3
Acbd6	6330407J23Rik	Acbd6
Acbd7	6330512M04Rik	Acbd7
Accn3	6330527O06Rik	Accn3
Ache	6430704M03Rik	Ache
Acot12	6820408C15Rik	Acot12
Acot4	8030411F24Rik	Acot4
Acot6	8030474K03Rik	Acot6
Acox3	8430408G22Rik	Acox3
Acpp	9030619P08Rik	Acpp
Acrbp	9130204L05Rik	Acrbp
Acsf3	9130219A07Rik	Acsf3
Acsm2	9130404H23Rik	Acsm2
Acsm3	9130409I23Rik	Acsm3
Actn2	9230104L09Rik	Actn2
Actn3	9230110C19Rik	Actn3
Acvr1c	9230110F15Rik	Acvr1c
Acvr2b	9330101J02Rik	Acvr2b
Acy1	9330159F19Rik	Acy1
Ada	9330171B17Rik	Ada
Adad1	9330182L06Rik	Adad1
Adam11	9530002B09Rik	Adam11
Adam12	9530077C05Rik	Adam12
Adam1a	A1cf	Adam1a
Adam21	A330021E22Rik	Adam21
Adam22	A330049M08Rik	Adam22
Adam28	A330050F15Rik	Adam28
Adam32	A430107O13Rik	Adam32
Adam8	A530016L24Rik	Adam8
Adamts2	A530053G22Rik	Adamts2
Adamts4	A930004D18Rik	Adamts4
Adamts7	A930017M01Rik	Adamts7
Adamtsl1	A930038C07Rik	Adamtsl1
Adamtsl2	AA792892	Adamtsl2
Adamtsl3	AC188461.4	Adamtsl3
Adap1	AF251705	Adap1
Adarb2	AI464131	Adarb2
Adat2	AI593442	Adat2
Adat3	AI661453	Adat3
Adc	AU015836	Adc
Adcy1	AU018091	Adcy1
Adcy5	AU021034	Adcy5
Adcy8	AU021092	Adcy8
Adcyap1	AV320801	Adcyap1
Adm	AW551984	Adm
Adm2	AY702102	Adm2
Adora2a	AY702103	Adora2a
Adora3	AY761184	Adora3
Adpgk	Aadac	Adpgk
Adra1a	Aard	Adra1a
Adra1b	Aatk	Adra1b
Adra2a	Abca13	Adra2a
Afm	Abca14	Afm
Afmid	Abca16	Afmid
Agbl3	Abca4	Agbl3
Agbl5	Abca6	Agbl5
Ager	Abcb11	Ager
Agl	Abcb4	Agl
Agmo	Abcb9	Agmo
Agpat6	Abcc2	Agpat6
Agpat9	Abcc6	Agpat9
Agphd1	Abcc9	Agphd1
Agtr1b	Abcg3	Agtr1b
Ahdc1	Abcg4	Ahdc1
Ahi1	Abcg8	Ahi1
Aicda	Ablim2	Aicda
Aif1	Ablim3	Aif1
Aifm2	Abo	Aifm2
Aim2	Abpa	Aim2
Ajap1	Abpb	Ajap1
Ak5	Abpd	Ak5
Akap3	Abph	Akap3
Akap5	Abra	Akap5
Akna	Acaca	Akna
Aknad1	Acan	Aknad1
Akr1c19	Acap1	Akr1c19
Akr1cl	Accn1	Akr1cl
Akr1d1	Accn2	Akr1d1
Alas2	Ace	Alas2
Aldh1a3	Ace2	Aldh1a3
Aldh1b1	Acer1	Aldh1b1
Aldh3b1	Acer2	Aldh3b1
Aldh4a1	Acnat2	Aldh4a1
Aldh8a1	Acot1	Aldh8a1
Aldoart2	Acot2	Aldoart2
Alkbh2	Acot3	Alkbh2
Alms1	Acox2	Alms1
Alox12e	Acoxl	Alox12e
Alox15	Acr	Alox15
Alox5	Acrv1	Alox5
Alpk3	Acsbg2	Alpk3
Als2	Acsm1	Als2
Als2cr11	Acsm5	Als2cr11
Als2cr12	Actl6b	Als2cr12
Amac1	Actl7a	Amac1
Amacr	Actl7b	Amacr
Amdhd1	Actl9	Amdhd1
Ammecr1	Actr3b	Ammecr1
Amn	Actrt1	Amn
Amn1	Actrt2	Amn1
Angel1	Acvrl1	Angel1
Angptl3	Acy3	Angptl3
Angptl6	Adad2	Angptl6
Ankle1	Adam18	Ankle1
Ankrd1	Adam1b	Ankrd1
Ankrd13b	Adam2	Ankrd13b
Ankrd24	Adam24	Ankrd24
Ankrd34a	Adam25	Ankrd34a
Ankrd42	Adam26a	Ankrd42
Ankrd54	Adam3	Ankrd54
Ankrd6	Adam33	Ankrd6
Ankrd61	Adam34	Ankrd61
Ankrd9	Adam5	Ankrd9
Anks4b	Adam6a	Anks4b
Ano9	Adam6b	Ano9
Anpep	Adam7	Anpep
Anubl1	Adamdec1	Anubl1
Anxa10	Adamts10	Anxa10
Ap1s3	Adamts15	Ap1s3
Ap3b2	Adamts16	Ap3b2
Ap3m2	Adamts18	Ap3m2
Ap4m1	Adamts20	Ap4m1
Apba1	Adamts3	Apba1
Apba2	Adamts5	Apba2
Apbb1ip	Adamtsl5	Apbb1ip
Apc2	Adarb1	Apc2
Aplf	Adcy10	Aplf
Aplp1	Adcy3	Aplp1
Apoh	Adcy4	Apoh
Apol11b	Adcy7	Apol11b
Apom	Adcyap1r1	Apom
Aptx	Add2	Aptx
Aqp11	Adh4	Aqp11
Arg2	Adh6-ps1	Arg2
Arhgap10	Adh6a	Arhgap10
Arhgap33	Adh6b	Arhgap33
Arhgap6	Adh7	Arhgap6
Arhgap8	Adig	Arhgap8
Arhgef1	Adora1	Arhgef1
Arhgef19	Adora2b	Arhgef19
Arhgef33	Adprhl1	Arhgef33
Arhgef9	Adra2b	Arhgef9
Arid3a	Adra2c	Arid3a
Arid3b	Adrb1	Arid3b
Arid5a	Adrb3	Arid5a
Arl13a	Afp	Arl13a
Armc7	Agbl4	Armc7
Armc9	Agmat	Armc9
Arnt2	Agr2	Arnt2
Arntl2	Agrp	Arntl2
Arrdc2	Agtr2	Arrdc2
Arsg	Agxt	Arsg
Art1	Agxt2	Art1
Art2b	Agxt2l1	Art2b
Art5	Ahrr	Art5
Artn	Ahsg	Artn
Arvcf	Aifm3	Arvcf
Asb11	Aim1l	Asb11
Asb17	Aipl1	Asb17
Ascl1	Ak7	Ascl1
Asphd1	Ak8	Asphd1
Asphd2	Akap14	Asphd2
Aspm	Akap4	Aspm
Asprv1	Akp3	Asprv1
Aspscr1	Akr1b7	Aspscr1
Aste1	Akr1c18	Aste1
Astn1	Akr1c20	Astn1
Asxl3	Akr1c21	Asxl3
Atad5	Akr1c6	Atad5
Atcay	Alb	Atcay
Atf3	Aldh1a2	Atf3
Atg16l2	Aldh1l1	Atg16l2
Atl1	Aldh1l2	Atl1
Atoh8	Aldh3a1	Atoh8
Atp1a4	Aldh3b2	Atp1a4
Atp6v1g2	Aldob	Atp6v1g2
Atp8b4	Aldoc	Atp8b4
Atpaf2	Allc	Atpaf2
Atr	Alox12	Atr
Atxn2l	Alox12b	Atxn2l
Aurkb	Alpi	Aurkb
Aven	Alpk2	Aven
Avil	Alpl	Avil
Avpr1a	Alx1	Avpr1a
Avpr2	Alx1	Avpr2
Azi1	Alx3	Azi1
B230217C12Rik	Ambp	B230217C12Rik
B3galt1	Amhr2	B3galt1
B3galt2	Amigo2	B3galt2
B3galt5	Ampd1	B3galt5
B3galtl	Amz1	B3galtl
B3gnt3	Ang	B3gnt3
B3gnt9-ps	Ang2	B3gnt9-ps
B3gntl1	Ang4	B3gntl1
B4galnt2	Angptl1	B4galnt2
B4galt2	Ank1	B4galt2
B9d1	Ank2	B9d1
BC005764	Ankrd13d	BC005764
BC016201	Ankrd2	BC016201
BC016495	Ankrd22	BC016495
BC016579	Ankrd23	BC016579
BC018242	Ankrd33	BC018242
BC021614	Ankrd34b	BC021614
BC021785	Ankrd36	BC021785
BC022687	Ankrd45	BC022687
BC024139	Ankrd5	BC024139
BC026585	Ankrd55	BC026585
BC030307	Ankrd7	BC030307
BC035044	Anks1b	BC035044
BC048507	Ano1	BC048507
BC048546	Ano3	BC048546
BC049762	Anxa13	BC049762
BC051142	Anxa8	BC051142
BC051628	Anxa9	BC051628
BC055324	Aoah	BC055324
BC089491	Aox3	BC089491
Baat	Aox4	Baat
Bag5	Apcdd1	Bag5
Bai2	Apcs	Bai2
Bai3	Apoa1	Bai3
Baiap2	Apoa2	Baiap2
Baiap3	Apoa4	Baiap3
Banf2	Apoa5	Banf2
Barx1	Apob	Barx1
Batf	Apobec2	Batf
Batf3	Apobec4	Batf3
Bbs1	Apobr	Bbs1
Bbs10	Apoc1	Bbs10
Bbs12	Apoc2	Bbs12
Bbs5	Apoc3	Bbs5
Bbs7	Apoc4	Bbs7
Bbs9	Apod	Bbs9
Bche	Apof	Bche
Bcl11a	Apol6	Bcl11a
Bcl11b	Apol7a	Bcl11b
Bcl2l14	Apol7b	Bcl2l14
Bcl9	Apol7c	Bcl9
Bcr	Apol7e	Bcr
Bend4	Apol8	Bend4
Bend5	Apol9a	Bend5
Bend6	Apol9b	Bend6
Bex2	Apold1	Bex2
Bhlha15	Apon	Bhlha15
Bhlhe41	Aqp12	Bhlhe41
Bhmt2	Aqp2	Bhmt2
Blk	Aqp3	Blk
Blm	Aqp4	Blm
Bmp5	Aqp5	Bmp5
Bmp6	Aqp6	Bmp6
Bmp7	Aqp7	Bmp7
Bmper	Aqp8	Bmper
Bmx	Aqp9	Bmx
Bmyc	Arap3	Bmyc
Bnc1	Arc	Bnc1
Bnipl	Areg	Bnipl
Bok	Arg1	Bok
Boll	Arhgap20	Boll
Bpifc	Arhgap25	Bpifc
Brca2	Arhgap36	Brca2
Brf2	Arhgdig	Brf2
Bsn	Arhgef15	Bsn
Bspry	Arhgef4	Bspry
Bst1	Armc2	Bst1
Btbd19	Armc3	Btbd19
Btc	Armc4	Btc
Btnl2	Armcx6	Btnl2
Btnl9	Arpm1	Btnl9
Bzrap1	Arpp21	Bzrap1
C030006K11Rik	Arr3	C030006K11Rik
C030019I05Rik	Arrdc5	C030019I05Rik
C030034I22Rik	Arsi	C030034I22Rik
C130026I21Rik	Arsj	C130026I21Rik
C1qtnf6	Art4	C1qtnf6
C2cd2l	Arx	C2cd2l
C2cd4a	Asah2	C2cd4a
C2cd4b	Asb10	C2cd4b
C330006D17Rik	Asb12	C330006D17Rik
C3ar1	Asb14	C3ar1
C6	Asb15	C6
C630004H02Rik	Asb4	C630004H02Rik
C87436	Asb5	C87436
C8g	Asb9	C8g
Cabp4	Ascl2	Cabp4
Cabp7	Ascl3	Cabp7
Cabyr	Asgr1	Cabyr
Cacna1b	Asgr2	Cacna1b
Cacna1d	Aspdh	Cacna1d
Cacna1e	Aspg	Cacna1e
Cacna1f	Asph	Cacna1f
Cacna1g	Aspn	Cacna1g
Cacna1s	Asrgl1	Cacna1s
Cacnb1	Ass1	Cacnb1
Cacng1	Asz1	Cacng1
Cacng2	Atf7ip2	Cacng2
Cacng4	Atg9b	Cacng4
Cacng6	Atoh1	Cacng6
Cacng7	Atoh7	Cacng7
Cad	Atp10b	Cad
Cadm2	Atp12a	Cadm2
Cadps	Atp13a5	Cadps
Cage1	Atp1a3	Cage1
Calca	Atp1b2	Calca
Calcb	Atp1b4	Calcb
Calhm2	Atp2b2	Calhm2
Calm4	Atp2c2	Calm4
Camk2a	Atp4a	Camk2a
Camk2n2	Atp4b	Camk2n2
Camk4	Atp6v0a4	Camk4
Camkv	Atp6v0d2	Camkv
Camta2	Atp6v1b1	Camta2
Caps2	Atp6v1c2	Caps2
Capsl	Atp6v1e2	Capsl
Capza3	Atp7b	Capza3
Car5b	Atp8a2	Car5b
Car7	Atp8b3	Car7
Car9	Aurkc	Car9
Card6	Avp	Card6
Carf	Aym1	Carf
Carns1	Azgp1	Carns1
Casc5	B3gat1	Casc5
Casq1	B3gnt5	Casq1
Casr	B3gnt6	Casr
Cass4	B3gnt7	Cass4
Catsper1	B3gnt8	Catsper1
Catsper2	B430306N03Rik	Catsper2
Catsper3	B4galnt4	Catsper3
Catsperg1	B630019K06Rik	Catsperg1
Catsperg2	BB287469	Catsperg2
Cbln3	BC007180	Cbln3
Cbln4	BC013712	Cbln4
Cby3	BC017612	Cby3
Ccbl2	BC020535	Ccbl2
Ccbp2	BC021891	Ccbp2
Ccdc106	BC025446	Ccdc106
Ccdc116	BC027072	Ccdc116
Ccdc120	BC030499	Ccdc120
Ccdc125	BC030500	Ccdc125
Ccdc126	BC030870	Ccdc126
Ccdc130	BC048562	Ccdc130
Ccdc157	BC048671	Ccdc157
Ccdc159	BC048679	Ccdc159
Ccdc160	BC061194	Ccdc160
Ccdc163	BC061195	Ccdc163
Ccdc164	BC068157	Ccdc164
Ccdc18	BC089597	Ccdc18
Ccdc33	BC094916	Ccdc33
Ccdc38	BC100451	Ccdc38
Ccdc46	BC100530	Ccdc46
Ccdc51	BC125332	Ccdc51
Ccdc57	Baalc	Ccdc57
Ccdc62	Bace2	Ccdc62
Ccdc73	Bai1	Ccdc73
Ccdc79	Baiap2l1	Ccdc79
Ccdc8	Bank1	Ccdc8
Ccdc83	Barhl2	Ccdc83
Ccdc87	Batf2	Ccdc87
Ccdc89	Bbox1	Ccdc89
Ccdc92	Bcam	Ccdc92
Ccdc96	Bcan	Ccdc96
Ccdc99	Bcas1	Ccdc99
Cchcr1	Bcat1	Cchcr1
Ccin	Bcl2a1a	Ccin
Ccl19	Bcl2a1b	Ccl19
Ccl21a	Bcl2a1d	Ccl21a
Ccl21b	Bcl2l10	Ccl21b
Ccl21c	Bcl2l15	Ccl21c
Ccl25	Bcl6b	Ccl25
Ccnb1ip1	Bcmo1	Ccnb1ip1
Ccne1	Bco2	Ccne1
Ccnf	Bdh2	Ccnf
Ccnj	Bean1	Ccnj
Ccnjl	Bend7	Ccnjl
Ccnk	Best1	Ccnk
Ccr5	Best2	Ccr5
Ccr6	Bex6	Ccr6
Ccr7	Bfsp1	Ccr7
Ccr9	Bfsp2	Ccr9
Ccrl1	Bglap	Ccrl1
Cct8l1	Bglap-rs1	Cct8l1
Cd160	Bglap2	Cd160
Cd177	Bhlhe22	Cd177
Cd180	Bhmt	Cd180
Cd19	Bhmt-ps1	Cd19
Cd2	Bicc1	Cd2
Cd200r3	Birc7	Cd200r3
Cd200r4	Bmp10	Cd200r4
Cd247	Bmp2	Cd247
Cd27	Bmp8a	Cd27
Cd276	Bmpr1b	Cd276
Cd28	Bpgm	Cd28
Cd320	Bpifa1	Cd320
Cd37	Bpifa2	Cd37
Cd3d	Bpifa3	Cd3d
Cd4	Bpifa5	Cd4
Cd40	Bpifb1	Cd40
Cd46	Brdt	Cd46
Cd5	Brsk1	Cd5
Cd6	Brsk2	Cd6
Cd69	Bsnd	Cd69
Cd72	Btg4	Cd72
Cd79b	Btla	Cd79b
Cd80	Btn1a1	Cd80
Cd86	Btnl10	Cd86
Cd8a	Bves	Cd8a
Cd8b1	C030005K15Rik	Cd8b1
Cdc25b	C030030A07Rik	Cdc25b
Cdc45	C130050O18Rik	Cdc45
Cdc6	C130079G13Rik	Cdc6
Cdca2	C1qc	Cdca2
Cdh17	C1ql2	Cdh17
Cdh20	C1ql3	Cdh20
Cdh22	C1qtnf1	Cdh22
Cdh23	C1qtnf2	Cdh23
Cdh3	C1qtnf3	Cdh3
Cdh4	C1qtnf4	Cdh4
Cdh7	C1qtnf7	Cdh7
Cdh8	C1qtnf9	Cdh8
Cdh9	C1ra	Cdh9
Cdhr1	C1rb	Cdhr1
Cdhr5	C4bp	Cdhr5
Cdk20	C530028O21Rik	Cdk20
Cdk5r1	C5ar1	Cdk5r1
Cdkl3	C77370	Cdkl3
Cdkn2a	C87414	Cdkn2a
Cdkn3	C8a	Cdkn3
Cdon	C8b	Cdon
Cdrt4	C9	Cdrt4
Cdx1	Cabp1	Cdx1
Ceacam10	Cabp2	Ceacam10
Ceacam18	Cabp5	Ceacam18
Celf4	Cacna1a	Celf4
Celsr3	Cacna1c	Celsr3
Cend1	Cacna1h	Cend1
Cenpk	Cacna2d2	Cenpk
Cenpn	Cacna2d3	Cenpn
Cenpo	Cacna2d4	Cenpo
Cenpp	Cacnb2	Cenpp
Cenpv	Cacnb4	Cenpv
Cep164	Cacng3	Cep164
Cep250	Cacng5	Cep250
Cep290	Cadm4	Cep290
Cep63	Calb1	Cep63
Cep72	Calb2	Cep72
Cep76	Calcr	Cep76
Cercam	Caln1	Cercam
Ces2b	Calr3	Ces2b
Ces2c	Caly	Ces2c
Ces2d-ps	Camk1g	Ces2d-ps
Ces2e	Camk2b	Ces2e
Ces5a	Camk2d	Ces5a
Cetn4	Camk2n1	Cetn4
Cfhr1	Camkk1	Cfhr1
Chek1	Camp	Chek1
Chi3l3	Cand2	Chi3l3
Chi3l4	Capn13	Chi3l4
Chic1	Capn3	Chic1
Chl1	Capn5	Chl1
Chn1	Capn6	Chn1
Chpf	Capn8	Chpf
Chpf2	Capn9	Chpf2
Chrm1	Capns2	Chrm1
Chrna3	Caprin2	Chrna3
Chrna5	Car10	Chrna5
Chrnb1	Car11	Chrnb1
Chrnb2	Car13	Chrnb2
Chrnb4	Car14	Chrnb4
Chrne	Car15	Chrne
Chrng	Car5a	Chrng
Chst2	Car6	Chst2
Chst3	Car8	Chst3
Chst7	Card11	Chst7
Chst8	Cartpt	Chst8
Chsy3	Caskin1	Chsy3
Cib2	Casp12	Cib2
Ciita	Casp14	Ciita
Cir1	Casq2	Cir1
Cit	Cav3	Cit
Clca1	Cbln1	Clca1
Clca4	Cbln1	Clca4
Clca5	Cbln2	Clca5
Clcn1	Cbs	Clcn1
Clcn2	Cc2d2a	Clcn2
Clcn6	Ccbl1	Clcn6
Cldn1	Ccdc102a	Cldn1
Cldn13	Ccdc103	Cldn13
Cldn4	Ccdc105	Cldn4
Cldn9	Ccdc108	Cldn9
Clec12b	Ccdc11	Clec12b
Clec2e	Ccdc110	Clec2e
Clec2g	Ccdc113	Clec2g
Clec2h	Ccdc13	Clec2h
Clec2i	Ccdc136	Clec2i
Clec4a2	Ccdc146	Clec4a2
Clec4a3	Ccdc150	Clec4a3
Clec4e	Ccdc151	Clec4e
Clec7a	Ccdc153	Clec7a
Clrn3	Ccdc158	Clrn3
Clstn2	Ccdc162	Clstn2
Cmah	Ccdc19	Cmah
Cml1	Ccdc24	Cml1
Cml3	Ccdc3	Cml3
Cmtm2a	Ccdc30	Cmtm2a
Cmya5	Ccdc39	Cmya5
Cnih2	Ccdc40	Cnih2
Cnih3	Ccdc54	Cnih3
Cnnm1	Ccdc63	Cnnm1
Cnnm4	Ccdc65	Cnnm4
Cntd1	Ccdc67	Cntd1
Cntf	Ccdc7	Cntf
Cntn1	Ccdc70	Cntn1
Cobl	Ccdc74a	Cobl
Col17a1	Ccdc81	Col17a1
Col19a1	Ccdc85a	Col19a1
Col22a1	Cck	Col22a1
Col25a1	Cckar	Col25a1
Col9a2	Cckbr	Col9a2
Colec12	Ccl12	Colec12
Coq10a	Ccl17	Coq10a
Coq6	Ccl2	Coq6
Corin	Ccl20	Corin
Cox6b2	Ccl22	Cox6b2
Cox7b2	Ccl27a	Cox7b2
Cox8c	Ccl27b	Cox8c
Cpa2	Ccl3	Cpa2
Cpa4	Ccl4	Cpa4
Cpeb1	Ccl5	Cpeb1
Cplx2	Ccl7	Cplx2
Cpne4	Ccl8	Cpne4
Cpne9	Ccl9	Cpne9
Cpsf4l	Ccna1	Cpsf4l
Cpt1b	Ccno	Cpt1b
Cpxm1	Ccr1	Cpxm1
Cpxm2	Ccr1l1	Cpxm2
Cr2	Ccr2	Cr2
Crb1	Ccr3	Crb1
Creb3l4	Ccrl2	Creb3l4
Crhbp	Cct6b	Crhbp
Crispld1	Cd14	Crispld1
Crocc	Cd164l2	Crocc
Crp	Cd200r1	Crp
Crtac1	Cd207	Crtac1
Crtam	Cd209a	Crtam
Crx	Cd209b	Crx
Crym	Cd209d	Crym
Csf1	Cd209e	Csf1
Csf2rb	Cd209f	Csf2rb
Csf2rb2	Cd209g	Csf2rb2
Csl	Cd22	Csl
Csn2	Cd244	Csn2
Cspg5	Cd248	Cspg5
Cst6	Cd300a	Cst6
Ctf1	Cd300lb	Ctf1
Ctif	Cd300ld	Ctif
Ctla4	Cd300lf	Ctla4
Ctnna3	Cd300lg	Ctnna3
Ctrl	Cd33	Ctrl
Ctsw	Cd3e	Ctsw
Ctxn1	Cd3g	Ctxn1
Cx3cl1	Cd55	Cx3cl1
Cx3cr1	Cd5l	Cx3cr1
Cxcl10	Cd7	Cxcl10
Cxcl9	Cd79a	Cxcl9
Cxcr5	Cd84	Cxcr5
Cxx1c	Cd93	Cxx1c
Cxxc4	Cd96	Cxxc4
Cyb561d1	Cda	Cyb561d1
Cybb	Cdh10	Cybb
Cybrd1	Cdh13	Cybrd1
Cyp17a1	Cdh15	Cyp17a1
Cyp26a1	Cdh16	Cyp26a1
Cyp27a1	Cdh19	Cyp27a1
Cyp2j13	Cdh5	Cyp2j13
Cyp2r1	Cdh6	Cyp2r1
Cyp2u1	Cdhr2	Cyp2u1
Cyp39a1	Cdhr3	Cyp39a1
Cyp4f13	Cdhr4	Cyp4f13
Cyp4f16	Cdk5r2	Cyp4f16
Cyp4f39	Cdkl1	Cyp4f39
Cyp4x1	Cdkl4	Cyp4x1
Cyp7b1	Cdsn	Cyp7b1
Cyp8b1	Cdx2	Cyp8b1
Cyr61	Ceacam1	Cyr61
Cys1	Ceacam11	Cys1
Cysltr2	Ceacam12	Cysltr2
Cyyr1	Ceacam13	Cyyr1
D11Wsu47e	Ceacam14	D11Wsu47e
D130043K22Rik	Ceacam15	D130043K22Rik
D130062J21Rik	Ceacam2	D130062J21Rik
D1Pas1	Ceacam20	D1Pas1
D2Wsu81e	Cecr2	D2Wsu81e
D330028D13Rik	Cel	D330028D13Rik
D3Bwg0562e	Cela2a	D3Bwg0562e
D630023F18Rik	Cela3b	D630023F18Rik
D6Mm5e	Celf5	D6Mm5e
D730039F16Rik	Celf6	D730039F16Rik
D7Ertd443e	Celsr2	D7Ertd443e
DXBay18	Ces1b	DXBay18
Dab1	Ces1c	Dab1
Dach2	Ces1e	Dach2
Dact3	Ces1g	Dact3
Dagla	Ces2a	Dagla
Dak	Ces3a	Dak
Dand5	Ces3b	Dand5
Dapk2	Cetn1	Dapk2
Dapp1	Cfhr2	Dapp1
Dbc1	Cfhr3	Dbc1
Dbil5	Cfi	Dbil5
Dbndd1	Cfp	Dbndd1
Dbndd2	Cftr	Dbndd2
Dcaf12l1	Cga	Dcaf12l1
Dcaf15	Cgref1	Dcaf15
Dchs1	Ch25h	Dchs1
Dclk2	Chad	Dclk2
Dclre1c	Chat	Dclre1c
Dcp1b	Chd5	Dcp1b
Dctd	Chga	Dctd
Ddhd1	Chi3l1	Ddhd1
Ddi1	Chia	Ddi1
Ddx11	Chit1	Ddx11
Ddx20	Chn2	Ddx20
Ddx25	Chodl	Ddx25
Ddx28	Chrdl1	Ddx28
Ddx43	Chrdl2	Ddx43
Deaf1	Chrna1	Deaf1
Decr2	Chrna4	Decr2
Defb42	Chrna6	Defb42
Dennd1c	Chrnb3	Dennd1c
Dennd2c	Chst10	Dennd2c
Dennd3	Chst13	Dennd3
Depdc1b	Chst4	Depdc1b
Derl3	Chst5	Derl3
Det1	Chst9	Det1
Dgkh	Cib4	Dgkh
Dgkk	Cidea	Dgkk
Dhh	Cideb	Dhh
Dhrs13	Cited1	Dhrs13
Dhtkd1	Cited4	Dhtkd1
Dhx34	Clca2	Dhx34
Dhx37	Clca3	Dhx37
Dio1	Clca6	Dio1
Diras2	Clcf1	Diras2
Dis3l	Clcnka	Dis3l
Disp2	Clcnkb	Disp2
Dleu7	Cldn11	Dleu7
Dlg2	Cldn15	Dlg2
Dlg4	Cldn16	Dlg4
Dlgap1	Cldn18	Dlgap1
Dlgap3	Cldn19	Dlgap3
Dlgap5	Cldn2	Dlgap5
Dll3	Cldn22	Dll3
Dlx5	Cldn26	Dlx5
Dmgdh	Cldn5	Dmgdh
Dmrt2	Cldnd2	Dmrt2
Dmrt3	Clec10a	Dmrt3
Dmrta2	Clec11a	Dmrta2
Dnahc11	Clec14a	Dnahc11
Dnahc9	Clec1a	Dnahc9
Dnaic2	Clec1b	Dnaic2
Dnajb3	Clec2l	Dnajb3
Dnajb7	Clec4b1	Dnajb7
Dnajc12	Clec4d	Dnajc12
Dnajc18	Clec4f	Dnajc18
Dnajc22	Clec4g	Dnajc22
Dnajc27	Clec4n	Dnajc27
Dnajc28	Clec5a	Dnajc28
Dnalc1	Clgn	Dnalc1
Dnalc4	Clic3	Dnalc4
Dnase1l1	Clic6	Dnase1l1
Dnase1l2	Clip3	Dnase1l2
Dnase1l3	Clmn	Dnase1l3
Dnase2a	Clnk	Dnase2a
Dnm3	Clps	Dnm3
Dnmbp	Clstn3	Dnmbp
Dnmt3l	Clvs1	Dnmt3l
Dntt	Clvs2	Dntt
Doc2a	Cma1	Doc2a
Doc2g	Cma2	Doc2g
Dock6	Cmklr1	Dock6
Dok2	Cml2	Dok2
Dok3	Cml5	Dok3
Dolpp1	Cmpk2	Dolpp1
Dos	Cmtm2b	Dos
Dph5	Cmtm5	Dph5
Dpp10	Cndp1	Dpp10
Dpyd	Cnfn	Dpyd
Dqx1	Cnga1	Dqx1
Drp2	Cnksr2	Drp2
Dsc3	Cnpy1	Dsc3
Dse	Cnr1	Dse
Dsg1a	Cntn2	Dsg1a
Dtl	Cntn3	Dtl
Dtnb	Cntn4	Dtnb
Dtwd2	Cntn6	Dtwd2
Duoxa1	Cntnap4	Duoxa1
Dusp10	Coch	Dusp10
Dusp15	Coil	Dusp15
Dusp23	Col10a1	Dusp23
Dusp27	Col11a1	Dusp27
Dync1i1	Col11a2	Dync1i1
Dync2h1	Col13a1	Dync2h1
Dyrk1b	Col1a2	Dyrk1b
Dyrk3	Col20a1	Dyrk3
Dzip1	Col23a1	Dzip1
E130012A19Rik	Col24a1	E130012A19Rik
E130303B06Rik	Col2a1	E130303B06Rik
E130309D14Rik	Col4a3	E130309D14Rik
E130309F12Rik	Col4a4	E130309F12Rik
E2f2	Col4a5	E2f2
E2f4	Col4a6	E2f4
E2f7	Col6a4	E2f7
E2f8	Col7a1	E2f8
E330016A19Rik	Col8a1	E330016A19Rik
E330021D16Rik	Col8a2	E330021D16Rik
Eaf2	Col9a1	Eaf2
Ebf2	Col9a3	Ebf2
Eci3	Colec10	Eci3
Eda2r	Colec11	Eda2r
Edaradd	Comp	Edaradd
Efcab1	Coro2b	Efcab1
Efcab2	Coro6	Efcab2
Efcab4a	Cotl1	Efcab4a
Efcab7	Cox6a2	Efcab7
Efcab9	Cox8b	Efcab9
Efemp2	Cpa1	Efemp2
Efhb	Cpa3	Efhb
Efna4	Cpa5	Efna4
Egfl6	Cpa6	Egfl6
Egflam	Cpb1	Egflam
Egln3	Cpb2	Egln3
Ehhadh	Cplx1	Ehhadh
Eif5a2	Cplx3	Eif5a2
Elavl2	Cplx4	Elavl2
Elf3	Cpm	Elf3
Ell3	Cpn1	Ell3
Elp4	Cpn2	Elp4
Eme1	Cpne5	Eme1
Emilin3	Cpne6	Emilin3
Eml5	Cpne7	Eml5
Eno2	Cps1	Eno2
Enox1	Cpz	Enox1
Enpp6	Crabp1	Enpp6
Entpd7	Crct1	Entpd7
Eomes	Creb3l3	Eomes
Epb4.1l4a	Creg2	Epb4.1l4a
Epb4.9	Crh	Epb4.9
Epha2	Crhr1	Epha2
Epha3	Crhr2	Epha3
Epha5	Crisp1	Epha5
Epha6	Crisp2	Epha6
Epha7	Crisp3	Epha7
Ephb4	Crisp4	Ephb4
Ephx4	Crlf1	Ephx4
Epsti1	Crmp1	Epsti1
Epyc	Crxos1	Epyc
Erc2	Cryaa	Erc2
Ercc4	Cryba1	Ercc4
Ercc6l	Cryba2	Ercc6l
Ercc8	Cryba4	Ercc8
Erf	Crybb1	Erf
Erg	Crybb2	Erg
Eri2	Crybb3	Eri2
Ermap	Cryga	Ermap
Ern2	Crygb	Ern2
Erv3	Crygc	Erv3
Esco2	Crygd	Esco2
Espn	Crygf	Espn
Evc	Crygn	Evc
Evi5l	Crygs	Evi5l
Exd1	Csdc2	Exd1
Exo1	Csf3r	Exo1
Exoc6b	Csgalnact1	Exoc6b
Extl1	Csmd1	Extl1
Eya2	Csmd2	Eya2
Eya4	Csmd3	Eya4
F13b	Csn1s1	F13b
F2	Csn1s2a	F2
F2rl1	Csn1s2b	F2rl1
F2rl2	Csn3	F2rl2
F630043A04Rik	Csrp3	F630043A04Rik
F8	Cst10	F8
Faah	Cst11	Faah
Fabp12	Cst12	Fabp12
Fabp7	Cst13	Fabp7
Fah	Cst7	Fah
Faim2	Cst8	Faim2
Fam105a	Cst9	Fam105a
Fam110a	Csta	Fam110a
Fam110b	Ctag2	Fam110b
Fam113b	Cthrc1	Fam113b
Fam115c	Ctrb1	Fam115c
Fam116b	Ctrc	Fam116b
Fam122b	Cts3	Fam122b
Fam129c	Cts6	Fam129c
Fam131a	Ctsg	Fam131a
Fam154a	Ctsj	Fam154a
Fam154b	Ctsk	Fam154b
Fam161a	Ctsm	Fam161a
Fam163a	Ctsq	Fam163a
Fam166a	Ctsr	Fam166a
Fam167a	Ctxn2	Fam167a
Fam171b	Ctxn3	Fam171b
Fam178b	Cubn	Fam178b
Fam187b	Cux2	Fam187b
Fam188b	Cuzd1	Fam188b
Fam189a1	Cwh43	Fam189a1
Fam189b	Cxadr	Fam189b
Fam18a	Cxcl1	Fam18a
Fam19a1	Cxcl13	Fam19a1
Fam19a2	Cxcl15	Fam19a2
Fam19a4	Cxcl17	Fam19a4
Fam19a5	Cxcl2	Fam19a5
Fam35a	Cxcl3	Fam35a
Fam40b	Cxcl5	Fam40b
Fam43a	Cxcr3	Fam43a
Fam54a	Cxcr6	Fam54a
Fam55b	Cyb5r2	Fam55b
Fam5b	Cyct	Fam5b
Fam5c	Cylc1	Fam5c
Fam64a	Cylc2	Fam64a
Fam70a	Cym	Fam70a
Fam71b	Cyp11a1	Fam71b
Fam71d	Cyp11b1	Fam71d
Fam71e1	Cyp11b2	Fam71e1
Fam71e2	Cyp19a1	Fam71e2
Fam72a	Cyp1a1	Fam72a
Fam81a	Cyp1a2	Fam81a
Fam82a1	Cyp1b1	Fam82a1
Fam83g	Cyp21a1	Fam83g
Fam89a	Cyp24a1	Fam89a
Fam98c	Cyp2a12	Fam98c
Fanca	Cyp2a22	Fanca
Fancg	Cyp2a4	Fancg
Far2	Cyp2a5	Far2
Fat2	Cyp2b10	Fat2
Fat3	Cyp2b19	Fat3
Fbn2	Cyp2c29	Fbn2
Fbrsl1	Cyp2c37	Fbrsl1
Fbxl16	Cyp2c38	Fbxl16
Fbxl19	Cyp2c40	Fbxl19
Fbxl2	Cyp2c44	Fbxl2
Fbxo17	Cyp2c50	Fbxo17
Fbxo2	Cyp2c54	Fbxo2
Fbxo24	Cyp2c55	Fbxo24
Fbxo27	Cyp2c65	Fbxo27
Fbxo36	Cyp2c66	Fbxo36
Fbxo44	Cyp2c68	Fbxo44
Fbxw10	Cyp2c70	Fbxw10
Fbxw21	Cyp2d10	Fbxw21
Fbxw5	Cyp2d12	Fbxw5
Fcgr1	Cyp2d22	Fcgr1
Fcgr4	Cyp2d26	Fcgr4
Fcrla	Cyp2d34	Fcrla
Fcrls	Cyp2d9	Fcrls
Fdxr	Cyp2j11	Fdxr
Fem1a	Cyp2j5	Fem1a
Fes	Cyp2j6	Fes
Fetub	Cyp2j9	Fetub
Fezf1	Cyp3a11	Fezf1
Fezf2	Cyp3a13	Fezf2
Fgd2	Cyp3a25	Fgd2
Fgd5	Cyp3a41a	Fgd5
Fgf11	Cyp3a41b	Fgf11
Fgf13	Cyp46a1	Fgf13
Fgf14	Cyp4a10	Fgf14
Fgf2	Cyp4a12a	Fgf2
Fgf21	Cyp4a12b	Fgf21
Fgf9	Cyp4a14	Fgf9
Fggy	Cyp4a31	Fggy
Fhad1	Cyp4b1	Fhad1
Fhl4	Cyp4f14	Fhl4
Figf	Cyp4f15	Figf
Fkbp14	Cyp4f18	Fkbp14
Fkbp1b	Cyp4v3	Fkbp1b
Fkbpl	Cyp7a1	Fkbpl
Flg	Cypt1	Flg
Flt3	Cypt12	Flt3
Flt3l	Cypt3	Flt3l
Fmn1	Cysltr1	Fmn1
Fmn2	Cyth4	Fmn2
Fmo3	Cytl1	Fmo3
Fmo5	D14Ertd668e	Fmo5
Fndc7	D18Ertd653e	Fndc7
Fosb	D430041D05Rik	Fosb
Fosl1	D630042F21Rik	Fosl1
Foxa3	D730048I06Rik	Foxa3
Foxd4	D930028M14Rik	Foxd4
Foxg1	Daam2	Foxg1
Foxj1	Dab2	Foxj1
Foxm1	Dach1	Foxm1
Foxo4	Daf2	Foxo4
Foxq1	Dao	Foxq1
Foxred2	Dazl	Foxred2
Foxs1	Dbh	Foxs1
Fpgs	Dbn1	Fpgs
Frem2	Dbx2	Frem2
Frmd3	Dcbld2	Frmd3
Frs3	Dcdc2a	Frs3
Fsd2	Dclk1	Fsd2
Fstl5	Dclk3	Fstl5
Fut2	Dcpp1	Fut2
Fut4	Dcpp2	Fut4
Fut9	Dcpp3	Fut9
Fxyd2	Dcst1	Fxyd2
Fzd8	Dcstamp	Fzd8
G630090E17Rik	Dct	G630090E17Rik
Gab3	Dcx	Gab3
Gabra4	Ddn	Gabra4
Gabrb1	Ddx4	Gabrb1
Gabrd	Ddx60	Gabrd
Gabrg1	Defa-rs1	Gabrg1
Gad2	Defa21	Gad2
Gadl1	Defa22	Gadl1
Gal3st2	Defa24	Gal3st2
Gal3st4	Defa5	Gal3st4
Galns	Defb1	Galns
Galnt11	Defb10	Galnt11
Galnt12	Defb11	Galnt12
Gamt	Defb12	Gamt
Gan	Defb13	Gan
Gapdhs	Defb15	Gapdhs
Gas7	Defb19	Gas7
Gas8	Defb2	Gas8
Gata3	Defb21	Gata3
Gbp1	Defb29	Gbp1
Gbp8	Defb35	Gbp8
Gc	Defb4	Gc
Gcat	Defb41	Gcat
Gcdh	Defb6	Gcdh
Gcet2	Defb8	Gcet2
Gch1	Defb9	Gch1
Gdap1l1	Dennd5b	Gdap1l1
Gdf15	Dgkb	Gdf15
Gdf9	Dgkg	Gdf9
Gdpd2	Dgki	Gdpd2
Gdpd3	Dhrs11	Gdpd3
Gem	Dhrs7c	Gem
Gemin5	Dio2	Gemin5
Gen1	Diras1	Gen1
Gfra2	Dkk2	Gfra2
Gfra4	Dkk3	Gfra4
Gga1	Dkkl1	Gga1
Ggt5	Dlgap2	Ggt5
Ggt7	Dlk1	Ggt7
Gh	Dlk2	Gh
Gimap1	Dll1	Gimap1
Gimap3	Dll4	Gimap3
Gimap5	Dlx1	Gimap5
Gimap7	Dlx2	Gimap7
Gimap9	Dmbt1	Gimap9
Git1	Dmc1	Git1
Gja4	Dmkn	Gja4
Gjb3	Dmp1	Gjb3
Gjb6	Dmrt1	Gjb6
Gjc3	Dmrta1	Gjc3
Gk2	Dmrtb1	Gk2
Gla	Dmrtc1a	Gla
Glb1	Dmrtc2	Glb1
Gli3	Dnahc1	Gli3
Glipr1l2	Dnahc12	Glipr1l2
Glis3	Dnahc2	Glis3
Glrb	Dnahc6	Glrb
Glrp1	Dnahc7b	Glrp1
Gls2	Dnahc8	Gls2
Glt28d2	Dnaic1	Glt28d2
Gltpd1	Dnajb13	Gltpd1
Gltscr1	Dnajb8	Gltscr1
Glyctk	Dnajc5b	Glyctk
Gm10058	Dnajc5g	Gm10058
Gm10083	Dnali1	Gm10083
Gm10096	Dnase1	Gm10096
Gm10147	Dnase2b	Gm10147
Gm10230	Dnm1	Gm10230
Gm10251	Dnmt3b	Gm10251
Gm10308	Doc2b	Gm10308
Gm10338	Dock11	Gm10338
Gm10345	Dock3	Gm10345
Gm10355	Dock4	Gm10355
Gm10401	Dok4	Gm10401
Gm10410	Dpep3	Gm10410
Gm10451	Dpf1	Gm10451
Gm10486	Dpf3	Gm10486
Gm10487	Dpp6	Gm10487
Gm10488	Dppa3	Gm10488
Gm10591	Dpy19l2	Gm10591
Gm10598	Dpys	Gm10598
Gm10600	Dpysl4	Gm10600
Gm10638	Dpysl5	Gm10638
Gm10699	Drd1a	Gm10699
Gm11109	Drd2	Gm11109
Gm11397	Drd4	Gm11397
Gm11744	Dsc1	Gm11744
Gm12394	Dscam	Gm12394
Gm128	Dtna	Gm128
Gm13304	Dtx4	Gm13304
Gm1337	Dub2a	Gm1337
Gm14085	Dusp13	Gm14085
Gm14137	Dusp14	Gm14137
Gm14296	Dusp2	Gm14296
Gm14459	Dusp21	Gm14459
Gm14483	Dusp8	Gm14483
Gm14501	Dusp9	Gm14501
Gm14632	Duxbl	Gm14632
Gm14685	Dydc1	Gm14685
Gm14819	Dydc2	Gm14819
Gm15440	Dynlrb2	Gm15440
Gm16390	Dyx1c1	Gm16390
Gm16432	E030010A14Rik	Gm16432
Gm166	E230008N13Rik	Gm166
Gm17227	E330013P04Rik	Gm17227
Gm1973	E330034G19Rik	Gm1973
Gm1977	Ear1	Gm1977
Gm1987	Ear10	Gm1987
Gm1993	Ear2	Gm1993
Gm2012	Ear5	Gm2012
Gm2023	Ebf3	Gm2023
Gm20489	Ebi3	Gm20489
Gm2163	Ecel1	Gm2163
Gm22	Ecm2	Gm22
Gm2411	Eda	Gm2411
Gm2442	Edil3	Gm2442
Gm266	Edn1	Gm266
Gm2916	Edn2	Gm2916
Gm3047	Edn3	Gm3047
Gm3127	Efcab10	Gm3127
Gm3187	Efcab3	Gm3187
Gm336	Efcab6	Gm336
Gm3417	Efcab8	Gm3417
Gm3448	Efhc1	Gm3448
Gm3618	Efhc2	Gm3618
Gm3893	Efhd1	Gm3893
Gm4297	Efna3	Gm4297
Gm4477	Efnb3	Gm4477
Gm4535	Efr3b	Gm4535
Gm4787	Egf	Gm4787
Gm4836	Egfl7	Gm4836
Gm4937	Egfl8	Gm4937
Gm4951	Ehd2	Gm4951
Gm5148	Ehd3	Gm5148
Gm527	Elane	Gm527
Gm5382	Elavl3	Gm5382
Gm5415	Elavl4	Gm5415
Gm5454	Elf5	Gm5454
Gm5465	Elfn1	Gm5465
Gm550	Elfn2	Gm550
Gm5567	Elmo1	Gm5567
Gm5617	Elmod1	Gm5617
Gm5640	Eln	Gm5640
Gm5795	Elovl2	Gm5795
Gm5868	Elovl3	Gm5868
Gm5934	Elovl4	Gm5934
Gm5936	Eltd1	Gm5936
Gm6121	Emid2	Gm6121
Gm614	Emilin1	Gm614
Gm626	Eml1	Gm626
Gm6289	Emp2	Gm6289
Gm6309	Emr1	Gm6309
Gm6377	Emr4	Gm6377
Gm6484	Emx2	Gm6484
Gm6604	En2	Gm6604
Gm7008	Endou	Gm7008
Gm7275	Eng	Gm7275
Gm7325	Enkur	Gm7325
Gm7353	Eno4	Gm7353
Gm7819	Enpp1	Gm7819
Gm885	Enpp2	Gm885
Gm9705	Enthd1	Gm9705
Gm9839	Entpd8	Gm9839
Gm9897	Epas1	Gm9897
Gm9958	Epb4.1l1	Gm9958
Gm9989	Epb4.2	Gm9989
Gm9994	Epgn	Gm9994
Gmip	Epha1	Gmip
Gna14	Epha10	Gna14
Gnao1	Epha4	Gnao1
Gnb1l	Ephb1	Gnb1l
Gnb3	Ephb2	Gnb3
Gng13	Ephb6	Gng13
Gng3	Ephx3	Gng3
Gngt2	Epn3	Gngt2
Gnmt	Epor	Gnmt
Golga7b	Eps8l1	Golga7b
Gpa33	Eps8l3	Gpa33
Gpank1	Epx	Gpank1
Gpat2	Ereg	Gpat2
Gpc5	Erlin1	Gpc5
Gpr115	Ermn	Gpr115
Gpr132	Erp27	Gpr132
Gpr133	Esm1	Gpr133
Gpr137	Esr2	Gpr137
Gpr149	Esrrb	Gpr149
Gpr151	Esx1	Gpr151
Gpr160	Etnk2	Gpr160
Gpr162	Evpl	Gpr162
Gpr171	Exoc3l2	Gpr171
Gpr173	Expi	Gpr173
Gpr176	F10	Gpr176
Gpr18	F11	Gpr18
Gpr182	F12	Gpr182
Gpr183	F5	Gpr183
Gpr19	F7	Gpr19
Gpr35	F9	Gpr35
Gpr62	Fa2h	Gpr62
Gpr64	Fabp1	Gpr64
Gpr68	Fabp2	Gpr68
Gpr87	Fabp6	Gpr87
Gprasp2	Fabp9	Gprasp2
Gprin1	Faim3	Gprin1
Gpsm3	Fam107a	Gpsm3
Gpx7	Fam109a	Gpx7
Grap	Fam122c	Grap
Grap2	Fam123a	Grap2
Grasp	Fam123c	Grasp
Greb1l	Fam131b	Greb1l
Grem1	Fam135b	Grem1
Grhl3	Fam151a	Grhl3
Gria1	Fam162b	Gria1
Gria3	Fam163b	Gria3
Grid1	Fam167b	Grid1
Grid2	Fam169a	Grid2
Grik2	Fam170a	Grik2
Grik5	Fam170b	Grik5
Grin2c	Fam171a2	Grin2c
Grin2d	Fam183b	Grin2d
Grip1	Fam184a	Grip1
Grk4	Fam184b	Grk4
Grm7	Fam194a	Grm7
Gsg1l	Fam196b	Gsg1l
Gsg2	Fam198b	Gsg2
Gsto2	Fam19a3	Gsto2
Gtse1	Fam23a	Gtse1
Guca1b	Fam26e	Guca1b
Gxylt2	Fam26f	Gxylt2
Gyltl1b	Fam38b	Gyltl1b
Gys1	Fam46b	Gys1
H1fnt	Fam47e	H1fnt
H2-Bl	Fam50b	H2-Bl
H2-DMa	Fam57b	H2-DMa
H2-DMb1	Fam59b	H2-DMb1
H2-DMb2	Fam65b	H2-DMb2
H2-Eb2	Fam71a	H2-Eb2
H2-M3	Fam71f1	H2-M3
H2-Oa	Fam83e	H2-Oa
H2-Ob	Fancd2	H2-Ob
H2-Q10	Fank1	H2-Q10
H2-Q2	Fap	H2-Q2
H2-Q4	Fasl	H2-Q4
H2-T24	Fat4	H2-T24
H2afy2	Fbll1	H2afy2
Haao	Fbln1	Haao
Hacl1	Fbln2	Hacl1
Hal	Fbln7	Hal
Hamp	Fbp1	Hamp
Hap1	Fbp2	Hap1
Has2	Fbxo15	Has2
Haus7	Fbxo41	Haus7
Haus8	Fbxw22	Haus8
Havcr1	Fbxw24	Havcr1
Havcr2	Fcer1a	Havcr2
Hc	Fcer2a	Hc
Hcn1	Fcna	Hcn1
Hcst	Fcnb	Hcst
Hdac10	Fcrl1	Hdac10
Hdgfrp2	Fer1l4	Hdgfrp2
Hdhd3	Fer1l6	Hdhd3
Hectd2	Fez1	Hectd2
Hecw1	Ffar2	Hecw1
Helq	Fga	Helq
Herc3	Fgb	Herc3
Hexim2	Fgf12	Hexim2
Hey1	Fgf15	Hey1
Hey2	Fgf18	Hey2
Hgd	Fgf7	Hgd
Hgf	Fgfr3	Hgf
Hgfac	Fgfr4	Hgfac
Hhat	Fgg	Hhat
Hhatl	Fgl1	Hhatl
Hic1	Fgr	Hic1
Hic2	Fhl1	Hic2
Hif3a	Fhl2	Hif3a
Hivep3	Fhl5	Hivep3
Hk3	Fhod3	Hk3
Hlcs	Fibcd1	Hlcs
Hmbs	Fibin	Hmbs
Hmga2	Fign	Hmga2
Hmha1	Filip1	Hmha1
Hnf4g	Fitm1	Hnf4g
Hoga1	Fjx1	Hoga1
Homer1	Fkbp10	Homer1
Homer3	Fkbp6	Homer3
Hormad1	Flnc	Hormad1
Hoxa1	Flrt1	Hoxa1
Hoxa10	Flrt2	Hoxa10
Hoxa4	Flt1	Hoxa4
Hoxd3	Fmo2	Hoxd3
Hoxd4	Fmo4	Hoxd4
Hoxd9	Fmod	Hoxd9
Hpgds	Fmr1nb	Hpgds
Hpn	Fn3k	Hpn
Hpse	Fndc3c1	Hpse
Hrasls5	Fndc5	Hrasls5
Hrc	Folh1	Hrc
Hrsp12	Folr1	Hrsp12
Hs3st3a1	Folr2	Hs3st3a1
Hs3st5	Folr4	Hs3st5
Hsd3b2	Foxa2	Hsd3b2
Hsd3b7	Foxc2	Hsd3b7
Hsf2bp	Foxd1	Hsf2bp
Hsf4	Foxd2	Hsf4
Hsh2d	Foxf1a	Hsh2d
Hspa1l	Foxf2	Hspa1l
Hspa2	Foxi1	Hspa2
Hspb2	Foxl2	Hspb2
Hspb3	Fpr1	Hspb3
Hspb9	Fpr2	Hspb9
Hspbap1	Fras1	Hspbap1
Htr2c	Frat2	Htr2c
Htr4	Frem1	Htr4
Htra4	Frmd4b	Htra4
Hunk	Frmd5	Hunk
Hvcn1	Frmpd1	Hvcn1
Hyi	Frzb	Hyi
Hyls1	Fscn2	Hyls1
Icam2	Fscn3	Icam2
Icam4	Fsd1	Icam4
Icam5	Fshb	Icam5
Icmt	Fsip1	Icmt
Icos	Fstl3	Icos
Icosl	Ftcd	Icosl
Ier5l	Ftmt	Ier5l
Iffo2	Fuca2	Iffo2
Ifi202b	Furin	Ifi202b
Ifltd1	Fut10	Ifltd1
Ifng	Fut7	Ifng
Ift140	Fxyd4	Ift140
Ift172	Fxyd7	Ift172
Ift74	Fyn	Ift74
Ift88	Fzd3	Ift88
Igfals	Fzd4	Igfals
Iglc2	Fzd9	Iglc2
Iglc3	G6pc	Iglc3
Igll1	G6pc2	Igll1
Igsf21	Gabbr1	Igsf21
Igsf9	Gabra1	Igsf9
Ikbke	Gabra2	Ikbke
Ikzf3	Gabra3	Ikzf3
Ikzf4	Gabra5	Ikzf4
Il10	Gabra6	Il10
Il10ra	Gabrb2	Il10ra
Il12a	Gabrb3	Il12a
Il13ra2	Gabrg2	Il13ra2
Il15ra	Gabrg3	Il15ra
Il17rb	Gabrp	Il17rb
Il18bp	Gabrr1	Il18bp
Il18r1	Gabrr2	Il18r1
Il1f9	Gad1	Il1f9
Il1r2	Gal	Il1r2
Il1rl1	Gal3st1	Il1rl1
Il1rl2	Galc	Il1rl2
Il1rn	Galnt13	Il1rn
Il20ra	Galnt5	Il20ra
Il20rb	Galnt6	Il20rb
Il21r	Galnt9	Il21r
Il22	Galntl1	Il22
Il27ra	Galntl2	Il27ra
Il28ra	Galntl5	Il28ra
Il2ra	Galntl6	Il2ra
Il3ra	Gap43	Il3ra
Il4	Garnl3	Il4
Il4i1	Gas2	Il4i1
Il4ra	Gast	Il4ra
Il7	Gata1	Il7
Il7r	Gata2	Il7r
Ildr1	Gata4	Ildr1
Iltifb	Gata5	Iltifb
Immp2l	Gcg	Immp2l
Impg1	Gcgr	Impg1
Inca1	Gchfr	Inca1
Ing2	Gck	Ing2
Inha	Gckr	Inha
Inhbb	Gcm1	Inhbb
Insl3	Gcm2	Insl3
Insl6	Gcnt3	Insl6
Insm1	Gdf2	Insm1
Intu	Gdf3	Intu
Ipo11	Gdf5	Ipo11
Iqce	Gfap	Iqce
Iqcf4	Gfi1b	Iqcf4
Iqcg	Gfra3	Iqcg
Iqgap3	Ggt1	Iqgap3
Iqsec2	Ggt6	Iqsec2
Irf4	Ghrh	Irf4
Irf5	Ghrhr	Irf5
Isl1	Ghrl	Isl1
Isl2	Gif	Isl2
Ispd	Gip	Ispd
Itga3	Gipc2	Itga3
Itga8	Gja3	Itga8
Itgal	Gja8	Itgal
Itgb1bp2	Gjb1	Itgb1bp2
Itgb1bp3	Gjb4	Itgb1bp3
Itgb3bp	Gjb5	Itgb3bp
Itgb6	Gjc2	Itgb6
Itgb8	Gjd2	Itgb8
Itgbl1	Gje1	Itgbl1
Itih1	Gkn1	Itih1
Itk	Gkn2	Itk
Itln1	Gkn3	Itln1
Itpripl1	Glb1l2	Itpripl1
Izumo1	Glb1l3	Izumo1
Jag2	Gli1	Jag2
Jak3	Gli2	Jak3
Jazf1	Glipr1l1	Jazf1
Jmjd5	Glod5	Jmjd5
Jph1	Glra1	Jph1
Katnb1	Glra2	Katnb1
Kazald1	Glt25d2	Kazald1
Kazn	Glt6d1	Kazn
Kbtbd10	Glt8d2	Kbtbd10
Kbtbd12	Glyat	Kbtbd12
Kcna1	Glycam1	Kcna1
Kcna2	Gm10010	Kcna2
Kcna3	Gm101	Kcna3
Kcna7	Gm10104	Kcna7
Kcnb1	Gm10220	Kcnb1
Kcnc1	Gm10256	Kcnc1
Kcnc3	Gm10334	Kcnc3
Kcnd1	Gm10352	Kcnd1
Kcng4	Gm10375	Kcng4
Kcnh3	Gm10376	Kcnh3
Kcnip2	Gm10377	Kcnip2
Kcnip3	Gm10378	Kcnip3
Kcnip4	Gm10391	Kcnip4
Kcnj13	Gm10394	Kcnj13
Kcnj14	Gm10412	Kcnj14
Kcnj15	Gm10413	Kcnj15
Kcnj3	Gm10419	Kcnj3
Kcnj4	Gm10436	Kcnj4
Kcnj5	Gm10439	Kcnj5
Kcnk2	Gm10471	Kcnk2
Kcnma1	Gm10482	Kcnma1
Kcnmb4	Gm10567	Kcnmb4
Kcnq3	Gm106	Kcnq3
Kcns3	Gm10639	Kcns3
Kcnu1	Gm10681	Kcnu1
Kctd13	Gm10921	Kctd13
Kctd4	Gm10922	Kctd4
Kdm4d	Gm11128	Kdm4d
Kera	Gm1123	Kera
Khdrbs2	Gm11428	Khdrbs2
Khk	Gm11627	Khk
Kif11	Gm11992	Kif11
Kif17	Gm12429	Kif17
Kif18a	Gm12824	Kif18a
Kif18b	Gm12888	Kif18b
Kif1a	Gm13011	Kif1a
Kif26a	Gm13023	Kif26a
Kif6	Gm13084	Kif6
Kif9	Gm13298	Kif9
Kifc1	Gm13306	Kifc1
Kifc2	Gm14226	Kifc2
Kifc5b	Gm14345	Kifc5b
Kirrel3	Gm14346	Kirrel3
Klf16	Gm14347	Klf16
Klhdc7a	Gm14351	Klhdc7a
Klhdc8a	Gm14374	Klhdc8a
Klhdc8b	Gm14446	Klhdc8b
Klhl1	Gm14474	Klhl1
Klhl10	Gm14476	Klhl10
Klhl11	Gm14477	Klhl11
Klhl29	Gm14484	Klhl29
Klhl32	Gm14525	Klhl32
Klhl8	Gm14548	Klhl8
Klra17	Gm14743	Klra17
Klra2	Gm14781	Klra2
Klre1	Gm14850	Klre1
Kmo	Gm15023	Kmo
Kndc1	Gm15080	Kndc1
Krba1	Gm15085	Krba1
Krt14	Gm15091	Krt14
Krt17	Gm15093	Krt17
Krt20	Gm15097	Krt20
Krt222	Gm15107	Krt222
Krt6b	Gm15114	Krt6b
Krt75	Gm15127	Krt75
Krt79	Gm15128	Krt79
Ksr1	Gm15284	Ksr1
Kynu	Gm15293	Kynu
Lace1	Gm15315	Lace1
Lactb2	Gm1564	Lactb2
Lag3	Gm1568	Lag3
Lama1	Gm15698	Lama1
Larp1b	Gm1574	Larp1b
Larp6	Gm16405	Larp6
Lat	Gm16430	Lat
Lax1	Gm1679	Lax1
Layn	Gm17019	Layn
Lbh	Gm1975	Lbh
Lca5	Gm1979	Lca5
Ldb2	Gm2022	Ldb2
Ldhd	Gm2030	Ldhd
Ldoc1l	Gm2042	Ldoc1l
Lef1	Gm239	Lef1
Leng9	Gm2506	Leng9
Lepre1	Gm2542	Lepre1
Leprel1	Gm2663	Leprel1
Leprel2	Gm2777	Leprel2
Letm2	Gm2784	Letm2
Letmd1	Gm2790	Letmd1
Lgals12	Gm2799	Lgals12
Lhb	Gm2825	Lhb
Lhpp	Gm2863	Lhpp
Lhx9	Gm2864	Lhx9
Lif	Gm2882	Lif
Limk1	Gm2913	Limk1
Lin7b	Gm2927	Lin7b
Lingo1	Gm2933	Lingo1
Lipc	Gm2964	Lipc
Lipg	Gm3012	Lipg
Lipt1	Gm3089	Lipt1
Lix1	Gm3090	Lix1
Lmbr1l	Gm3259	Lmbr1l
Lmcd1	Gm3302	Lmcd1
Lmln	Gm3376	Lmln
Lmo3	Gm3402	Lmo3
Lmod1	Gm3404	Lmod1
Lonrf2	Gm3453	Lonrf2
Lonrf3	Gm3486	Lonrf3
Loxl2	Gm3543	Loxl2
Loxl3	Gm3573	Loxl3
Loxl4	Gm364	Loxl4
Lpcat2b	Gm3676	Lpcat2b
Lpin3	Gm3685	Lpin3
Lpo	Gm3701	Lpo
Lrat	Gm3706	Lrat
Lrch4	Gm3750	Lrch4
Lrfn3	Gm3763	Lrfn3
Lrfn4	Gm3776	Lrfn4
Lrit1	Gm4064	Lrit1
Lrit2	Gm4181	Lrit2
Lrmp	Gm4222	Lrmp
Lrp1b	Gm4450	Lrp1b
Lrp2bp	Gm4684	Lrp2bp
Lrp4	Gm4792	Lrp4
Lrr1	Gm4871	Lrr1
Lrrc16b	Gm5128	Lrrc16b
Lrrc17	Gm5129	Lrrc17
Lrrc18	Gm5142	Lrrc18
Lrrc2	Gm5168	Lrrc2
Lrrc20	Gm5169	Lrrc20
Lrrc24	Gm5407	Lrrc24
Lrrc26	Gm5647	Lrrc26
Lrrc3	Gm5771	Lrrc3
Lrrc39	Gm5797	Lrrc39
Lrrc3b	Gm5861	Lrrc3b
Lrrc46	Gm5862	Lrrc46
Lrrc48	Gm5916	Lrrc48
Lrrc4c	Gm5926	Lrrc4c
Lrrc51	Gm5935	Lrrc51
Lrrc56	Gm5941	Lrrc56
Lrrc61	Gm6205	Lrrc61
Lrrc63	Gm6367	Lrrc63
Lrrc7	Gm6370	Lrrc7
Lrrc8e	Gm6455	Lrrc8e
Lrrc9	Gm6460	Lrrc9
Lrriq3	Gm6465	Lrriq3
Lrrtm1	Gm6557	Lrrtm1
Lrrtm2	Gm6772	Lrrtm2
Lrrtm3	Gm6792	Lrrtm3
Lrrtm4	Gm6812	Lrrtm4
Lrsam1	Gm6821	Lrsam1
Lrtm1	Gm732	Lrtm1
Lsm2	Gm7347	Lsm2
Lta	Gm7361	Lta
Ltb	Gm7903	Ltb
Ltbp2	Gm7995	Ltbp2
Ltc4s	Gm8005	Ltc4s
Ly6h	Gm8068	Ly6h
Ly9	Gm8122	Ly9
Lyar	Gm8138	Lyar
Lypd1	Gm8159	Lypd1
Lypd6	Gm8221	Lypd6
Lyplal1	Gm8279	Lyplal1
Lyrm1	Gm8297	Lyrm1
Lyrm7	Gm8369	Lyrm7
Lyst	Gm872	Lyst
Lyzl4	Gm88	Lyzl4
Mad2l2	Gm884	Mad2l2
Maff	Gm8857	Maff
Magee1	Gm8871	Magee1
Mageh1	Gm8890	Mageh1
Magi1	Gm8897	Magi1
Malt1	Gm8906	Malt1
Mamstr	Gm8922	Mamstr
Man2b2	Gm8926	Man2b2
Maneal	Gm9112	Maneal
Map2k6	Gm94	Map2k6
Map3k14	Gm9758	Map3k14
Map3k9	Gm9780	Map3k9
Map4k1	Gm9782	Map4k1
Map4k2	Gm98	Map4k2
Mapk11	Gm9817	Mapk11
Mapk12	Gm9866	Mapk12
Mapk8ip1	Gm9999	Mapk8ip1
Mark1	Gmcl1l	Mark1
Masp2	Gnal	Masp2
Mast1	Gnat1	Mast1
Matk	Gnat2	Matk
Mblac1	Gng4	Mblac1
Mboat1	Gng7	Mboat1
Mc1r	Gngt1	Mc1r
Mcart1	Gnrhr	Mcart1
Mcm8	Golt1a	Mcm8
Mcoln3	Got1l1	Mcoln3
Mcph1	Gp1ba	Mcph1
Mctp1	Gp1bb	Mctp1
Mctp2	Gp2	Mctp2
Mdc1	Gp5	Mdc1
Mdm1	Gp9	Mdm1
Mdm4	Gpc3	Mdm4
Me3	Gpc6	Me3
Med26	Gpd1	Med26
Megf6	Gpihbp1	Megf6
Mei4	Gpm6b	Mei4
Meox1	Gpnmb	Meox1
Mep1a	Gpr1	Mep1a
Metrn	Gpr101	Metrn
Mettl11b	Gpr110	Mettl11b
Mettl22	Gpr114	Mettl22
Mettl8	Gpr116	Mettl8
Mex3a	Gpr12	Mex3a
Mex3d	Gpr123	Mex3d
Mfsd12	Gpr124	Mfsd12
Mfsd2b	Gpr137c	Mfsd2b
Mgat5b	Gpr143	Mgat5b
Mgmt	Gpr153	Mgmt
Mia2	Gpr158	Mia2
Mipol1	Gpr17	Mipol1
Mis18bp1	Gpr174	Mis18bp1
Mks1	Gpr20	Mks1
Mlana	Gpr22	Mlana
Mlf1ip	Gpr30	Mlf1ip
Mmp11	Gpr34	Mmp11
Mmp24	Gpr37	Mmp24
Mms22l	Gpr37l1	Mms22l
Mn1	Gpr50	Mn1
Mns1	Gpr6	Mns1
Mob3c	Gpr61	Mob3c
Mocos	Gpr81	Mocos
Mocs3	Gpr83	Mocs3
Morn1	Gpr84	Morn1
Morn2	Gpr88	Morn2
Morn4	Gpr97	Morn4
Mosc1	Gpr98	Mosc1
Mospd4	Gprc5a	Mospd4
Mov10	Gprc5b	Mov10
Mpp3	Gprc5c	Mpp3
Mpst	Gpx2	Mpst
Mpv17l	Gpx5	Mpv17l
Mrap2	Gpx6	Mrap2
Mrgprb1	Greb1	Mrgprb1
Ms4a6c	Gria2	Ms4a6c
Msc	Gria4	Msc
Msh4	Grifin	Msh4
Msi1	Grik1	Msi1
Msl3l2	Grik3	Msl3l2
Msln	Grin1	Msln
Mst1	Grin2b	Mst1
Msx2	Grin3a	Msx2
Mtap1a	Grip2	Mtap1a
Mterf	Grm1	Mterf
Mtmr9	Grm2	Mtmr9
Mttp	Grm3	Mttp
Mtus2	Grm4	Mtus2
Mum1	Grm5	Mum1
Mum1l1	Grm8	Mum1l1
Mx1	Grp	Mx1
Mxra7	Grrp1	Mxra7
Myadml2	Gsdma	Myadml2
Mybl1	Gsdma2	Mybl1
Mybl2	Gsdmc	Mybl2
Mybpc1	Gsdmc2	Mybpc1
Mybpc2	Gsdmc4	Mybpc2
Myh7	Gsg1	Myh7
Mylk2	Gsta1	Mylk2
Mylk3	Gsta2	Mylk3
Myo3b	Gsta3	Myo3b
Myo9a	Gstm3	Myo9a
Myog	Gstm4	Myog
Myom3	Gstm6	Myom3
Myot	Gstm7	Myot
Mypop	Gstt4	Mypop
Myst1	Gtf2a1l	Myst1
Myzap	Gtsf1	Myzap
N28178	Gtsf1l	N28178
N4bp3	Guca1a	N4bp3
Naa11	Guca2a	Naa11
Nagpa	Guca2b	Nagpa
Naif1	Gucy1b3	Naif1
Naip1	Gulo	Naip1
Naip6	Gyk	Naip6
Nanos1	Gykl1	Nanos1
Nap1l2	Gypa	Nap1l2
Nap1l3	Gys2	Nap1l3
Napb	Gzma	Napb
Naprt1	Gzmb	Naprt1
Nat9	Gzmc	Nat9
Nbl1	Gzmd	Nbl1
Ncdn	Gzme	Ncdn
Nckap5	Gzmf	Nckap5
Nckipsd	Gzmg	Nckipsd
Ncrna00085	Gzmm	Ncrna00085
Ndst2	Gzmn	Ndst2
Ndufa4l2	H1fx	Ndufa4l2
Ndufaf3	H2afb1	Ndufaf3
Neil3	Habp2	Neil3
Nek2	Habp4	Nek2
Nek4	Hamp2	Nek4
Neto2	Hand1	Neto2
Neu2	Hand2	Neu2
Neurod4	Hao1	Neurod4
Nfam1	Hao2	Nfam1
Nfasc	Hapln1	Nfasc
Nfe2l3	Hapln2	Nfe2l3
Nfkbid	Hapln4	Nfkbid
Nid2	Has1	Nid2
Nipal3	Hba-x	Nipal3
Nipal4	Hbb-y	Nipal4
Nkapl	Hbegf	Nkapl
Nkd2	Hck	Nkd2
Nkx2-6	Hcn2	Nkx2-6
Nkx3-1	Hcrt	Nkx3-1
Nle1	Hdgfl1	Nle1
Nlgn1	Hdhd1a	Nlgn1
Nlgn2	Heatr7b1	Nlgn2
Nmb	Heatr7b2	Nmb
Nme6	Hebp2	Nme6
Nmnat2	Hecw2	Nmnat2
Nmnat3	Hemgn	Nmnat3
Nol10	Hemt1	Nol10
Nol3	Hepacam	Nol3
Nol4	Hepacam2	Nol4
Nos2	Hephl1	Nos2
Nova1	Hes5	Nova1
Noxo1	Heyl	Noxo1
Npas4	Hfe2	Npas4
Nptx1	Higd1b	Nptx1
Nptx2	Hilpda	Nptx2
Nqo1	Hils1	Nqo1
Nr1d1	Hist1h3d	Nr1d1
Nr1i2	Hist3h2ba	Nr1i2
Nr1i3	Hivep2	Nr1i3
Nr5a2	Hkdc1	Nr5a2
Nr6a1	Hlf	Nr6a1
Nradd	Hmcn1	Nradd
Nrcam	Hmgb4	Nrcam
Nrm	Hmgcll1	Nrm
Nrn1l	Hmgcs2	Nrn1l
Nsg2	Hmx1	Nsg2
Nsl1	Hnf1b	Nsl1
Nsun6	Hnf4a	Nsun6
Nsun7	Homer2	Nsun7
Ntf5	Hormad2	Ntf5
Ntng1	Hoxa11	Ntng1
Ntpcr	Hoxb13	Ntpcr
Nudt1	Hoxb2	Nudt1
Nudt17	Hoxb5	Nudt17
Nudt7	Hoxb6	Nudt7
Nup188	Hoxb7	Nup188
Nup43	Hoxb8	Nup43
Nupl2	Hoxb9	Nupl2
Nxf2	Hoxc10	Nxf2
Nxnl1	Hoxc5	Nxnl1
Nxnl2	Hoxc9	Nxnl2
Nxph1	Hoxd1	Nxph1
Nyx	Hoxd10	Nyx
Oaf	Hoxd13	Oaf
Obscn	Hpca	Obscn
Ocel1	Hpcal4	Ocel1
Ocstamp	Hpd	Ocstamp
Odf2l	Hpdl	Odf2l
Odz1	Hpx	Odz1
Ogfod1	Hr	Ogfod1
Oip5	Hrasls	Oip5
Olfm3	Hrg	Olfm3
Olfm4	Hrh1	Olfm4
Olfml1	Hrh3	Olfml1
Olfr112	Hrh4	Olfr112
Olig1	Hrk	Olig1
Olig2	Hrnr	Olig2
Omp	Hs3st2	Omp
Onecut1	Hs3st4	Onecut1
Onecut2	Hs3st6	Onecut2
Oog3	Hs6st2	Oog3
Optc	Hsd11b2	Optc
Orc1	Hsd17b1	Orc1
Osbpl10	Hsd17b13	Osbpl10
Oscar	Hsd17b3	Oscar
Oscp1	Hsd17b6	Oscp1
Osr2	Hsd3b1	Osr2
Otud3	Hsd3b3	Otud3
Otx1	Hsd3b4	Otx1
Oxgr1	Hsd3b5	Oxgr1
P2rx3	Hsd3b6	P2rx3
P2rx5	Hsf5	P2rx5
P2ry10	Hsfy2	P2ry10
P2ry12	Hspa12a	P2ry12
P2ry14	Hspa12b	P2ry14
Pabpc2	Hspb7	Pabpc2
Pabpc6	Htr1a	Pabpc6
Pacrg	Htr1d	Pacrg
Pacs2	Htr1f	Pacs2
Pacsin1	Htr2b	Pacsin1
Pacsin3	Htr3a	Pacsin3
Pak6	Htr3b	Pak6
Palm2	Htr5b	Palm2
Pamr1	Htra3	Pamr1
Paox	Hyal5	Paox
Papolb	Hyal6	Papolb
Pappa	Hydin	Pappa
Pappa2	Iapp	Pappa2
Paqr5	Ibsp	Paqr5
Paqr9	Ica1l	Paqr9
Pard6a	Ido1	Pard6a
Pars2	Ifi27l2b	Pars2
Pask	Ifi44	Pask
Pax5	Ifitm5	Pax5
Pax9	Ifitm6	Pax9
Pbld1	Igbp1b	Pbld1
Pbp2	Igf2	Pbp2
Pcdh12	Igf2bp1	Pcdh12
Pcdh15	Igf2bp3	Pcdh15
Pcdh17	Igfbp1	Pcdh17
Pcdh18	Igfbp5	Pcdh18
Pcdh20	Ighg2c	Pcdh20
Pcdh8	Igj	Pcdh8
Pcdh9	Iglon5	Pcdh9
Pcdhb12	Igsf1	Pcdhb12
Pcdhb16	Igsf11	Pcdhb16
Pcdhb19	Igsf6	Pcdhb19
Pcdhb22	Ihh	Pcdhb22
Pcdhb7	Il12rb2	Pcdhb7
Pcdhb9	Il17b	Pcdhb9
Pclo	Il17rc	Pclo
Pcnxl2	Il17re	Pcnxl2
Pcolce2	Il18rap	Pcolce2
Pcp4l1	Il1b	Pcp4l1
Pcsk9	Il1f5	Pcsk9
[truncated: 4,914 more rows]
