# Supplementary material for: Integrative analysis of scRNA-seq and scATAC-seq revealed transit-amplifying thymic epithelial cells expressing autoimmune regulator
Source: eLife. 2022 May 17;11:e73998. doi: 10.7554/eLife.73998 (PMC9113748; doi:10.7554/eLife.73998)
Supplement: Supplementary file 7. [file elife-73998-supp7.xlsx]

## Sheet: TA_TEC_marker_gene
Supplementary File 7. Possible marker gene candidates for transit-amplifying TECs.
Feature.ID	EDGE.test..mCherrylo.vs.mCherryhi..tagwise.dispersions...Fold.change	EDGE.test..mCherrylo.vs.mCherryhi..tagwise.dispersions...P.value	EDGE.test..mCherrylo.vs.RTOC_mCherryhi..tagwise.dispersions...Fold.change	EDGE.test..mCherrylo.vs.RTOC_mCherryhi..tagwise.dispersions...P.value	EDGE.test..mCherryhi.vs.RTOC_mCherryhi..tagwise.dispersions...Fold.change	EDGE.test..mCherryhi.vs.RTOC_mCherryhi..tagwise.dispersions...P.value	mCherrylo...Fastp_mCherrylo.1_S17692..GE....Normalized.expression.values	mCherrylo...Fastp_mCherrylo.2_S17695..GE....Normalized.expression.values	mCherrylo...Fastp_mCherrylo.3_S17698..GE....Normalized.expression.values	mCherrylo...Normalized.means	mCherryhi...Fastp_mCherryhi.1_S17691..GE....Normalized.expression.values	mCherryhi...Fastp_mCherryhi.2_S17694..GE....Normalized.expression.values	mCherryhi...Fastp_mCherryhi.3_S17697..GE....Normalized.expression.values	mCherryhi...Normalized.means	RTOC_mCherryhi...Fastp_RTOC_mCherryhi.1_S17693..GE....Normalized.expression.values	RTOC_mCherryhi...Fastp_RTOC_mCherryhi.2_S17696..GE....Normalized.expression.values	RTOC_mCherryhi...Fastp_RTOC_mCherryhi.3_S17699..GE....Normalized.expression.values	RTOC_mCherryhi...Normalized.means
Kif20a	-47.942	4.731e-22	-13.7487	5.636e-13	3.48702	0.0006774	795.9	500.3	575.1	623.767	18.9	4.3	17	13.4	89.8	27.1	30.5	49.1333
Hist1h1b	-31.583	5.749e-12	-7.43318	9.844e-06	4.24892	0.001245	773.9	955.7	898.7	876.1	41.9	4.3	43	29.7333	283.3	63.1	49.6	132
Stmn1	-22.7308	5.742e-14	-10.102	3.318e-09	2.25013	0.0374664	368.2	275	332.6	325.267	17.2	4.3	23	14.8333	59.4	20	24.8	34.7333
Hist1h2ap	-19.1036	3.482e-12	-8.00979	1.526e-07	2.38503	0.0322775	272.1	231.2	213.4	238.9	15.6	10	14	13.2	63.6	21	13.4	32.6667
Pbk	-16.5389	2.216e-05	-8.48936	0.0008008	1.94819	0.265516	150.7	126.6	126.2	134.5	19.7	0	6	8.56667	42.8	7	3.8	17.8667
Dut	-16.0076	9.347e-16	-6.38071	7.509e-09	2.50875	0.005461	368.2	425.5	286.5	360.067	24.6	17.1	30	23.9	96.7	38.1	47.7	60.8333
Kif22	-14.6602	1.695e-09	-5.46888	4.798e-05	2.68065	0.0177942	343.8	243.2	269.5	285.5	31.2	8.6	22	20.6	114.7	18	40.1	57.6
Selenoh	-14.2625	8.448e-23	-6.25645	5.343e-13	2.27964	0.001342	776.4	692.6	614.2	694.4	50.9	51.4	54	52.1	145.1	120.3	81.1	115.5
Mns1	-11.946	1.692e-06	-6.62107	0.000116	1.80423	0.274293	88.8	94.7	83.2	88.9	4.9	4.3	14	7.73333	15.2	4	22.9	14.0333
Lmnb1	-11.9231	1.147e-15	-6.67968	1.866e-10	1.78499	0.0445302	1017.5	972.6	960.8	983.633	114.1	50	102	88.7	280.5	97.2	102.1	159.933
Phgdh	-11.3765	0	-8.41298	0	1.35225	0.0938838	6895.3	7294.8	6254.7	6814.93	746	695.4	503	648.133	953.5	765.7	813.1	844.1
Lockd	-11.3274	3.423e-08	-4.3552	0.0002805	2.60089	0.0302287	101	74.7	102.2	92.6333	10.7	7.1	8	8.6	26.3	10	30.5	22.2667
Tubb5	-11.1216	0	-5.60024	4.418e-12	1.98592	0.004014	14050.5	12853.5	12262	13055.3	1688.1	991	1139	1272.7	4365.4	1604.6	1592.7	2520.9
Mex3a	-11.0925	3.491e-15	-5.33298	9.052e-09	2.07999	0.0105391	927.1	733.5	941.8	867.467	110	57.1	85	84.0333	196.2	76.2	241.4	171.267
Tmem158	-10.0675	0	-5.45337	4.223e-13	1.8461	0.006588	4486.4	5448.1	4218.9	4717.8	508.8	556.9	452	505.9	1223	986.2	517.2	908.8
Mdk	-10.0143	0	-2.5821	6.831e-05	3.87836	2.883e-08	2943.4	3288.6	2877.4	3036.47	186.3	442.6	340	322.967	1561.5	933.1	1230.1	1241.57
Hist1h1e	-9.10784	1.443e-17	-2.65802	4.738e-05	3.42655	6.741e-07	779.6	1198.9	988.9	989.133	110.8	108.5	133	117.433	496.1	402.9	277.7	392.233
Wnt10b	-8.78359	1.148e-08	-21.0808	4.975e-14	-2.40002	0.0159011	1500.6	1396.2	1398.6	1431.8	138.7	171.3	211	173.667	38.7	21	148.9	69.5333
Kremen2	-8.72158	3.451e-10	-6.95906	1.219e-08	1.25327	0.483758	788.6	607.9	707.3	701.267	127.2	34.3	98	86.5	167.2	46.1	111.7	108.333
Hist1h2ae	-8.47674	1.863e-06	-13.6931	3.996e-08	-1.61538	0.356728	57.8	78.7	71.1	69.2	10.7	8.6	7	8.76667	8.3	4	3.8	5.36667
Hirip3	-8.02779	3.553e-09	-4.06194	2.932e-05	1.97634	0.0511977	241.1	258.1	175.3	224.833	31.2	30	29	30.0667	98.1	31.1	50.6	59.9333
Rangrf	-7.93311	1.548e-07	-7.8354	2.164e-07	1.01247	0.969695	195.5	169.4	162.3	175.733	22.2	12.9	35	23.3667	37.3	11	23.9	24.0667
Pold2	-7.8933	5.342e-08	-4.50628	3.895e-05	1.75162	0.122383	446.4	519.2	393.7	453.1	64	65.7	56	61.9	239.1	39.1	60.1	112.767
Srm	-7.66547	3.146e-17	-3.9075	3.806e-09	1.96173	0.003353	1511.2	1456	1066	1344.4	224.9	154.2	187	188.7	551.4	273.6	273.9	366.3
Npm3	-7.59247	5.128e-08	-4.48445	2.935e-05	1.69307	0.14889	149.9	190.3	167.3	169.167	28.7	11.4	31	23.7	55.3	28.1	37.2	40.2
Kpna2	-7.4756	1.271e-13	-5.28942	3.613e-10	1.41331	0.178887	1439.5	914.8	1062	1138.77	187.9	162.8	138	162.9	392.5	126.3	175.6	231.467
Prmt1	-7.45667	1.149e-14	-4.3139	5.741e-09	1.72852	0.0291755	855.4	676.7	724.4	752.167	113.2	109.9	101	108.033	286.1	109.2	164.1	186.467
Psmc3ip	-7.42697	8.535e-06	-3.92717	0.001453	1.89118	0.167334	97.8	57.8	49.1	68.2333	9	10	10	9.66667	30.4	9	16.2	18.5333
Tuba1b	-7.2011	0	-4.78716	8.223e-12	1.50425	0.0634558	14676.2	12994	10679	12783.1	2336.4	1360.8	2042	1913.07	4420.7	2251.1	1850.4	2840.73
Snrpd1	-7.00698	4.51e-07	-3.53806	0.0005417	1.98046	0.0823695	135.2	148.5	113.2	132.3	12.3	30	19	20.4333	52.5	35.1	30.5	39.3667
Utf1	-6.79076	0	-4.08437	3.775e-14	1.66262	0.005046	6098.6	5983.3	5950.1	6010.67	1005.3	1050.9	805	953.733	1430.3	1517.4	1592.7	1513.47
Vim	-6.62027	2.744e-12	-4.69615	5.395e-09	1.40973	0.179001	7039.5	6294.2	6614.4	6649.37	943.7	1647.8	634	1075.17	1046.1	1601.6	1650.9	1432.87
Myef2	-6.54577	1.427e-14	-3.58349	5.736e-08	1.82665	0.00999	1939.7	1911.4	1568.9	1806.67	207.6	431.2	245	294.6	576.3	481.1	512.5	523.3
Nucks1	-6.36131	0	-4.2345	1.575e-11	1.50226	0.0495643	9798.8	10802.6	9823.4	10141.6	1524.8	2066.2	1545	1712	3778.1	2105.8	1770.2	2551.37
Tubb2b	-6.32535	8.806e-18	-4.36334	2.053e-12	1.44966	0.0719495	1798	1237.7	1567.9	1534.53	266.7	234.2	276	258.967	460.2	353.8	282.5	365.5
Isyna1	-6.2251	2.22e-16	-4.16253	5.272e-11	1.49551	0.0595871	1853.4	2369.8	1715.2	1979.47	273.3	405.5	346	341.6	623.2	426	454.2	501.133
Apex1	-6.15163	2.278e-09	-2.87119	0.0002792	2.14253	0.0106127	254.2	274.1	225.4	251.233	47.6	35.7	48	43.7667	123	59.1	96.4	92.8333
Snrpf	-6.07313	3.605e-10	-3.86517	1.448e-06	1.57125	0.108132	523	377.7	369.7	423.467	96	51.4	76	74.4667	176.9	76.2	96.4	116.5
Slc1a3	-6.02952	0	-4.10757	5.995e-14	1.46791	0.0364574	3926.7	4184.5	3298.2	3803.13	764	685.4	594	681.133	1231.3	746.7	948.6	975.533
Gar1	-5.98008	6.346e-05	-2.52812	0.0289641	2.36543	0.0515641	75.8	76.7	99.2	83.9	13.1	7.1	24	14.7333	55.3	16	36.3	35.8667
Ranbp1	-5.94491	1.758e-15	-4.30019	2.956e-11	1.38248	0.130789	1459.9	1869.5	1507.8	1612.4	321.7	271.3	288	293.667	584.5	297.7	321.6	401.267
Hes6	-5.91926	1.821e-14	-3.72444	6.376e-09	1.5893	0.0375328	1907.9	1644.3	2012.8	1855	334	314.1	360	336.033	847.1	332.8	425.6	535.167
Parp1	-5.79559	6.629e-15	-4.29821	4.44e-11	1.34837	0.17413	894.5	961.7	898.7	918.3	169.9	181.3	161	170.733	295.7	177.4	204.2	225.767
Hnrnpa1	-5.79243	4.441e-16	-3.55987	1.626e-09	1.62715	0.0179024	9688.8	10066.2	8450.8	9401.93	1812	1879.1	1552	1747.7	4343.3	2244.1	1870.4	2819.27
Nap1l1	-5.74331	3.004e-11	-3.55577	6.932e-07	1.61521	0.0590348	694.9	914.8	658.2	755.967	141.2	148.5	137	142.233	352.4	140.3	195.6	229.433
Hmgn2	-5.66405	0	-5.4206	0	1.04491	0.820011	3481.1	3248.8	3728	3485.97	719.7	629.7	640	663.133	979.8	538.2	530.6	682.867
Bex3	-5.64506	2.378e-11	-2.77378	4.066e-05	2.03515	0.004993	406.5	540.1	496.9	481.167	95.2	75.7	105	91.9667	223.9	146.3	179.4	183.2
Tmsb10	-5.63574	2.162e-09	-3.05334	5.9e-05	1.84576	0.0304556	375.6	327.9	320.6	341.367	78	65.7	52	65.2333	95.4	144.3	99.2	112.967
Cdhr1	-5.56496	7.327e-14	-4.62576	1.518e-11	1.20304	0.400878	4070.9	2621.9	3620.8	3437.87	686.9	684	609	659.967	616.3	587.3	1072.6	758.733
Rpsa	-5.53071	0	-3.63368	9.082e-12	1.52207	0.0224877	20571.9	18346.5	19338.2	19418.9	4569.3	2892.9	3911	3791.07	7706.9	4364.9	4865	5645.6
Hmgn1	-5.5004	1.488e-14	-2.85341	1.039e-06	1.92766	0.002173	1655.4	1988.1	1734.2	1792.57	352.1	335.6	367	351.567	1012.9	492.1	515.3	673.433
Kcnn3	-5.4646	1.267e-05	1.05828	0.877332	5.78307	6.835e-06	272.9	235.2	227.4	245.167	82.1	21.4	42	48.5	414.6	312.7	90.7	272.667
Trim59	-5.40675	8.022e-07	-5.15466	1.693e-06	1.04891	0.918397	172.7	113.6	163.3	149.867	32.8	25.7	30	29.5	27.6	25.1	36.3	29.6667
Set	-5.36204	0	-3.07624	6.518e-09	1.74305	0.003584	6760.9	9065.6	7872.7	7899.73	1540.3	1813.4	1425	1592.9	3580.5	2203	2393.4	2725.63
Banf1	-5.27766	7.831e-14	-3.69576	2.088e-09	1.42803	0.098527	1019.1	1013.5	997.9	1010.17	210.1	171.3	235	205.467	362.1	208.5	293.9	288.167
Atp5g2	-5.24908	8.766e-11	-2.53585	0.0001545	2.06995	0.003672	458.7	545.1	452.8	485.533	131.3	85.7	84	100.333	200.4	169.4	227.1	198.967
Rpl12	-5.22385	0	-3.03137	3.345e-09	1.72326	0.003374	2818.7	2842.2	2648	2769.63	660.6	495.5	561	572.367	1282.4	799.8	809.2	963.8
Nudt1	-5.22173	4.591e-08	-5.1523	5.829e-08	1.01348	0.980447	255.8	214.3	230.4	233.5	49.2	52.8	42	48	64.9	39.1	39.1	47.7
H2afy2	-5.16925	3.067e-08	-3.54976	1.256e-05	1.45623	0.192104	768.2	828.1	753.4	783.233	123.9	214.2	149	162.367	291.6	286.7	109.7	229.333
Gnl3	-5.16565	2.359e-09	-2.64552	0.0002289	1.9526	0.0130103	332.4	366.7	333.6	344.233	78	72.8	65	71.9333	204.5	106.2	105.9	138.867
Eif5a	-5.15376	0	-4.0907	5.329e-15	1.25987	0.185485	7973.1	8612.2	8417.8	8334.37	1734	1660.6	1829	1741.2	2776.2	1701.9	1977.3	2151.8
Impdh2	-5.13929	1.6e-10	-2.87621	2.105e-05	1.78683	0.019829	747	777.3	602.1	708.8	154.3	111.4	178	147.9	375.9	167.4	245.3	262.867
Taf1d	-5.0638	4.614e-13	-3.3747	2.795e-08	1.50052	0.061299	1121.8	1261.6	1165.2	1182.87	306.1	198.5	254	252.867	416	256.6	432.3	368.3
C1qbp	-5.02277	5.31e-12	-2.59149	2.367e-05	1.93818	0.00376	628.9	789.3	710.3	709.5	151.8	172.8	134	152.867	355.1	234.5	276.7	288.767
Ncl	-4.95848	1.565e-12	-3.47114	2.186e-08	1.42849	0.102303	2718.5	3664.3	3121.8	3168.2	529.3	856.7	674	686.667	1336.3	774.8	805.4	972.167
Nop56	-4.89089	2.683e-11	-3.36016	1.866e-07	1.45556	0.10952	554.8	569	506.9	543.567	119.8	127.1	112	119.633	210	145.3	153.6	169.633
Fbl	-4.87063	1.551e-11	-2.8319	4.989e-06	1.71992	0.0174028	908.4	1352.3	1195.2	1151.97	249.5	261.3	258	256.267	621.9	312.7	375	436.533
Hspd1	-4.60707	1.201e-12	-4.2887	1.095e-11	1.07423	0.732217	2013	2025	2009.8	2015.93	471	429.8	510	470.267	757.3	368.8	380.8	502.3
Dtymk	-4.58284	1.853e-10	-3.55435	7.376e-08	1.28936	0.279194	595.5	685.6	545	608.7	166.6	122.8	141	143.467	233.5	155.4	152.7	180.533
Rps2	-4.54439	8.66e-15	-2.81077	6.186e-08	1.61678	0.0110299	2722.6	2935.8	2812.3	2823.57	730.4	556.9	724	670.433	1401.2	902	878	1060.4
Rps4x	-4.47003	1.186e-10	-3.20792	3.55e-07	1.39344	0.143664	938.5	742.4	784.5	821.8	254.4	142.8	196	197.733	356.5	211.5	239.5	269.167
Mybbp1a	-4.4339	2.687e-11	-3.26869	7.655e-08	1.35648	0.158276	3130.8	2924.9	2538.8	2864.83	842	668.3	583	697.767	1482.8	576.3	763.4	940.833
Wipi1	-4.40628	6.966e-12	-3.68734	1.015e-09	1.19497	0.402191	1271.7	1139.1	1083	1164.6	311.8	305.6	236	284.467	357.9	359.8	258.6	325.433
Rps18	-4.40589	2.049e-12	-2.37405	2.518e-05	1.85586	0.002598	1685.5	2213.3	2029.8	1976.2	462	422.7	567	483.9	1019.8	648.5	966.7	878.333
Trim28	-4.38699	2.887e-15	-2.92508	5.238e-09	1.49978	0.0252248	5306.7	5215.9	5454.2	5325.6	1368	1288	1266	1307.33	2462.5	1298.9	2015.5	1925.63
H2afz	-4.37863	2.348e-11	-4.50949	1.008e-11	-1.02989	0.89549	849.7	1095.2	985.8	976.9	229.8	242.7	250	240.833	243.2	209.5	225.2	225.967
Lpar1	-4.34509	0.0002712	-2.02939	0.0702754	2.14108	0.0528214	968.6	752.4	777.5	832.833	243.7	155.6	218	205.767	1088.9	188.4	105.9	461.067
Rpl13	-4.33975	9.248e-13	-2.40119	1.217e-05	1.80733	0.003076	2228.9	2916.9	2184.1	2443.3	582.7	612.6	627	607.433	1347.4	1027.3	836	1070.23
Nme1	-4.33043	1.197e-07	-2.49654	0.0006707	1.73457	0.0443412	351.9	257.1	247.5	285.5	89.5	61.4	61	70.6333	160.3	89.2	110.7	120.067
Snrpa1	-4.2513	0.0001318	-2.66608	0.007651	1.59459	0.231662	110.8	121.6	77.1	103.167	23	35.7	20	26.2333	56.7	38.1	27.7	40.8333
Mif	-4.23639	1.169e-12	-1.70485	0.006557	2.48491	4.697e-06	4453	4505.4	3868.2	4275.53	1167.8	1052.4	1041	1087.07	3044.3	2975.8	1768.3	2596.13
Hmgb3	-4.15037	2.23e-05	-4.65836	5.649e-06	-1.1224	0.757311	211.8	137.5	156.3	168.533	43.5	40	46	43.1667	52.5	20	42	38.1667
Alyref	-4.12033	2.33e-10	-2.97975	6.988e-07	1.38278	0.136115	1929.9	2534.2	1564.9	2009.67	490.7	566.9	519	525.533	963.2	658.5	517.2	712.967
Ppia	-4.1171	5.539e-12	-2.69742	8.394e-07	1.52631	0.0340912	2486.4	3678.3	3475.5	3213.4	764.8	912.4	855	844.067	1366.7	1165.6	1212.9	1248.4
Snrpd2	-4.10607	7.875e-07	-2.0673	0.008078	1.9862	0.0161115	245.2	194.3	212.4	217.3	55	51.4	63	56.4667	117.5	87.2	122.2	108.967
Shisa2	-4.09908	5.232e-06	-1.07424	0.810575	3.81578	1.443e-05	1736.9	1462.9	1166.2	1455.33	422.6	348.4	371	380.667	2357.5	382.9	1666.2	1468.87
1500009L16Rik	-4.07444	0.0154312	-9.73941	0.0003028	-2.39037	0.200085	25.3	24.9	37.1	29.1	5.7	11.4	6	7.7	8.3	0	1.9	3.4
Gja4	-4.04689	4.242e-06	-1.34852	0.307741	3.00099	0.0002516	2096.1	1806.7	1947.6	1950.13	548.2	452.6	551	517.267	525.1	1835.2	1928.6	1429.63
Rps19	-4.04271	1.628e-12	-3.15567	4.145e-09	1.2811	0.198512	2361.7	2428.6	2330.4	2373.57	646.7	575.4	673	631.7	927.3	543.2	902.8	791.1
Ppih	-4.01614	0.0006844	-3.33806	0.002905	1.20314	0.680663	83.1	47.8	62.1	64.3333	16.4	14.3	20	16.9	30.4	18	12.4	20.2667
Rps15a	-3.99817	4.824e-11	-2.7293	1.206e-06	1.46491	0.0631598	1307.5	1068.3	1125.1	1166.97	392.3	227	323	314.1	522.4	371.8	441.8	445.333
Kpnb1	-3.99646	1.021e-13	-2.67719	7.336e-08	1.49278	0.0268561	4411.4	5232.9	4275	4639.77	1166.1	1387.9	1195	1249.67	2165.4	1635.7	1649	1816.7
Pa2g4	-3.99249	2.851e-09	-3.24273	3.281e-07	1.23121	0.369494	644.4	803.2	662.2	703.267	203.5	187.1	181	190.533	291.6	161.4	236.7	229.9
Rps17	-3.9878	8.007e-10	-3.08757	4.187e-07	1.29157	0.243069	1499.8	1290.5	1431.7	1407.33	482.5	245.6	414	380.7	631.5	335.8	476.2	481.167
Cmtm7	-3.97586	2.454e-10	-2.41636	3.391e-05	1.64539	0.0194547	1273.3	1068.3	1082	1141.2	376.7	288.4	263	309.367	402.1	501.1	538.2	480.467
Ncam1	-3.92956	6.363e-06	-3.48116	3.601e-05	1.12881	0.686832	670.5	317.9	529	505.8	132.1	84.2	191	135.767	182.4	166.4	98.3	149.033
Prdx4	-3.90028	1.217e-05	-2.64371	0.001464	1.47531	0.209102	198.8	210.3	285.5	231.533	67.3	42.8	81	63.7	105	65.1	105.9	92
Rfc5	-3.8956	7.616e-08	-3.48159	7.017e-07	1.11892	0.661623	574.3	579	456.9	536.733	152.6	152.8	139	148.133	241.8	133.3	116.4	163.833
Gfra2	-3.87524	3.944e-05	-7.63532	3.337e-09	-1.97029	0.0384494	1081.9	914.8	613.1	869.933	254.4	225.6	240	240	157.5	161.4	33.4	117.433
Maged1	-3.85178	6.484e-14	-1.70858	0.002151	2.25438	4.153e-06	3442	2802.3	2896.4	3046.9	1005.3	819.6	730	851.633	2280.1	1544.5	1762.6	1862.4
Rps8	-3.82068	2.159e-12	-2.51284	8.875e-07	1.52046	0.0246067	1875.4	2330.9	2199.1	2135.13	660.6	551.2	604	605.267	1046.1	803.8	824.5	891.467
Cmc2	-3.81661	0.002672	-3.24891	0.007941	1.17473	0.759285	80.7	66.8	58.1	68.5333	20.5	15.7	21	19.0667	40.1	6	22.9	23
F2rl1	-3.80021	1.94e-07	-2.86819	2.961e-05	1.32495	0.263599	1116.1	1022.5	1004.9	1047.83	253.6	401.2	231	295.267	277.8	462	365.5	368.433
Hmgb1	-3.78935	4.695e-10	-2.91725	4.046e-07	1.29894	0.209156	3232.6	4403.8	3170.9	3602.43	979	1313.7	790	1027.57	1627.9	1108.5	1174.7	1303.7
Lsm2	-3.76258	3.805e-08	-2.39349	0.0002157	1.57201	0.0563283	707.1	645.8	572.1	641.667	166.6	181.3	199	182.3	420.1	205.5	230	285.2
Tcp1	-3.76094	9.973e-12	-2.88455	3.674e-08	1.30382	0.165011	1411.8	1219.8	1303.4	1311.67	425.1	331.3	369	375.133	576.3	379.9	471.4	475.867
Lyar	-3.75867	0.0001117	-2.36054	0.009501	1.59229	0.174615	110.8	179.4	127.2	139.133	41	50	30	40.3333	77.4	47.1	63	62.5
Cbx3	-3.71975	1.988e-10	-2.4508	9.948e-06	1.51777	0.0379807	4667.2	5564.7	4297	4842.97	1504.2	1692.1	1029	1408.43	2756.9	1843.2	1657.6	2085.9
Ppp1r14b	-3.70463	2.689e-05	-2.34155	0.005096	1.58213	0.142976	178.4	205.3	190.4	191.367	60.7	42.8	63	55.5	87.1	58.1	110.7	85.3
Rpl3	-3.70176	1.643e-12	-2.66917	7.876e-08	1.38686	0.0699568	4264	3659.3	3686.9	3870.07	1357.3	965.3	1059	1127.2	2042.4	1238.8	1295.9	1525.7
Snrpb	-3.70101	5.26e-12	-2.29845	7.708e-06	1.61022	0.0102003	2338.1	2747.5	2445.6	2510.4	856.8	708.2	642	735.667	1470.3	951.2	1037.3	1152.93
Ascl1	-3.69717	0.0001266	-4.90564	4.322e-06	-1.32686	0.394412	3651.3	3156.1	3088.8	3298.73	938.8	1236.6	693	956.133	1428.9	590.3	172.7	730.633
Npm1	-3.67342	1.771e-07	-2.99283	8.635e-06	1.22741	0.413877	489.6	549.1	479.9	506.2	139.5	181.3	125	148.6	234.9	155.4	145.1	178.467
Rpl28	-3.66241	9.284e-10	-2.20729	0.0001305	1.65923	0.0152399	800	791.3	711.3	767.533	266.7	209.9	202	226.2	421.5	309.7	357.9	363.033
Rpl6	-3.65098	1.818e-11	-2.2935	1.138e-05	1.59188	0.0134546	3234.2	3742.1	3992.5	3656.27	1042.2	968.1	1227	1079.1	2043.8	1557.5	1420	1673.77
Rpl32	-3.64638	2.783e-10	-2.7053	8.852e-07	1.34787	0.134196	6332.4	5637.5	6347.9	6105.93	2132	1412.2	1877	1807.07	3139.7	1429.2	2610	2392.97
Sms	-3.64408	3.125e-05	-2.35776	0.004529	1.54557	0.157702	309.6	220.2	217.4	249.067	64	92.8	62	72.9333	181	76.2	81.1	112.767
Rpl8	-3.64366	7.346e-12	-2.47633	1.06e-06	1.47139	0.0361598	2699.8	2526.3	2457.6	2561.23	888.8	644	742	758.267	1341.8	1035.3	862.7	1079.93
Snrpg	-3.59373	1.486e-05	-2.84119	0.0003329	1.26487	0.433168	236.3	242.2	223.4	233.967	79.6	78.5	53	70.3667	117.5	55.1	89.7	87.4333
Enpp4	-3.58525	6.947e-09	-2.02643	0.0009982	1.76925	0.008647	933.6	848.1	799.5	860.4	238.8	311.3	222	257.367	581.8	393.9	360.7	445.467
Ruvbl2	-3.54295	9.018e-08	-2.35225	0.000232	1.5062	0.0796469	513.2	458.4	467.9	479.833	169.9	119.9	147	145.6	248.7	159.4	231.9	213.333
Rpl14	-3.51737	1.243e-08	-2.36488	7.2e-05	1.48734	0.0675987	735.6	926.8	878.6	847	295.4	221.3	266	260.9	478.1	341.8	313	377.633
Eef1g	-3.50841	2.901e-11	-2.30023	7.163e-06	1.52524	0.0221315	3222	3411.2	2839.3	3157.5	1117.7	908.1	892	972.6	1958.2	1098.5	1303.6	1453.43
Tmed1	-3.49983	1.327e-06	-1.59836	0.0605212	2.18964	0.002367	338.1	268.1	227.4	277.867	101.8	82.8	71	85.2	197.6	164.4	176.5	179.5
Lsm5	-3.4973	0.0328881	-5.55398	0.003306	-1.58808	0.445433	42.4	18.9	36.1	32.4667	3.3	18.6	8	9.96667	11.1	2	5.7	6.26667
Igdcc4	-3.46371	5.598e-08	-2.80699	5.363e-06	1.23396	0.346603	3030.6	1877.5	1904.6	2270.9	802.6	602.6	693	699.4	1361.2	595.4	618.4	858.333
Lsm3	-3.44524	0.00282	-2.02729	0.0814574	1.69943	0.222107	51.3	45.8	31.1	42.7333	15.6	14.3	10	13.3	27.6	21	17.2	21.9333
Mrto4	-3.43413	4.616e-06	-2.34976	0.001236	1.46148	0.156345	380.4	459.4	338.6	392.8	134.6	128.5	108	123.7	275	132.3	130.7	179.333
Scoc	-3.40832	0.0003367	-1.78372	0.0834286	1.91079	0.0591145	119.8	110.6	125.2	118.533	38.6	38.6	35	37.4	87.1	80.2	40.1	69.1333
Rpl4	-3.40584	3.273e-09	-2.94189	1.601e-07	1.1577	0.467552	6818.7	4581.1	5256.8	5552.2	2271.5	1249.4	1740	1753.63	2791.4	1473.3	1695.8	1986.83
Rps5	-3.39554	1.718e-08	-3.06575	2.141e-07	1.10757	0.628101	5301.8	3615.5	3952.4	4289.9	1872.7	885.3	1329	1362.33	1978.9	1053.4	1377.1	1469.8
Ezh2	-3.38926	4.406e-06	-2.69881	0.0001684	1.25584	0.384781	492.9	414.6	392.7	433.4	211.7	92.8	111	138.5	174.1	143.3	180.4	165.933
Anp32b	-3.36988	7.99e-09	-2.53698	7.673e-06	1.3283	0.168828	2371.5	2970.7	2331.4	2557.87	711.5	953.8	784	816.433	1491.1	862	863.6	1072.23
Snrpa	-3.36898	1.048e-07	-2.66338	1.424e-05	1.26493	0.301663	611.8	651.7	644.2	635.9	204.3	217	189	203.433	334.4	181.4	243.3	253.033
Eef1b2	-3.34135	4.145e-11	-2.37991	1.526e-06	1.40398	0.0581194	2853	3469	2915.5	3079.17	1039.8	981	967	995.933	1597.5	1203.7	1269.2	1356.8
Sae1	-3.34005	9.094e-07	-2.69073	4.568e-05	1.24132	0.375505	616.7	588	583.1	595.933	160	219.9	193	190.967	334.4	155.4	217.6	235.8
Cct5	-3.33518	1.42e-10	-3.08553	1.765e-09	1.08091	0.673981	2417.9	2098.7	2135	2217.2	800.9	686.8	658	715.233	968.7	541.2	759.6	756.5
Maz	-3.3277	4.631e-12	-2.63437	1.838e-08	1.26319	0.169816	3760.5	3644.4	3498.6	3634.5	1211.3	1129.5	1182	1174.27	1621	1284.9	1402.8	1436.23
Naa10	-3.32117	7.346e-06	-2.49971	0.0005463	1.32863	0.28109	514.9	441.5	427.8	461.4	163.3	109.9	173	148.733	312.3	135.3	145.1	197.567
Rpl36	-3.31935	2.981e-08	-2.40929	3.903e-05	1.37773	0.132342	1110.4	1143	1275.4	1176.27	404.6	298.4	442	381.667	635.7	354.8	556.4	515.633
Ybx1	-3.31511	2.352e-09	-2.75972	3.536e-07	1.20125	0.350354	2777.2	2069.8	1972.7	2273.23	970.8	609.7	636	738.833	1127.6	738.7	715.7	860.667
Lsm6	-3.31114	0.000236	-3.26749	0.0002988	1.01336	0.973751	210.2	192.3	209.4	203.967	91.1	60	49	66.7	111.9	46.1	43.9	67.3
Ccdc34	-3.309	2.858e-05	-2.09239	0.007931	1.58145	0.107213	190.6	221.2	215.4	209.067	65.7	72.8	66	68.1667	132.7	78.2	105.9	105.6
Srsf1	-3.28363	4.35e-09	-2.20097	7.628e-05	1.4919	0.0435056	4681.1	6643	5340	5554.7	1647	2126.1	1706	1826.37	2917.2	2737.2	2245.5	2633.3
Orc6	-3.27954	0.000384	-2.18602	0.017255	1.50024	0.224758	181.7	137.5	101.2	140.133	54.2	42.8	40	45.6667	99.5	59.1	43.9	67.5
Snrpe	-3.24457	3.921e-05	-3.09015	8.012e-05	1.04997	0.867374	258.2	283	248.5	263.233	99.3	81.4	82	87.5667	123	51.1	98.3	90.8
Kcnq3	-3.24174	7.404e-07	-2.34762	0.0002708	1.38086	0.16752	1066.4	816.2	768.4	883.667	320.9	294.1	261	292	606.7	338.8	249.1	398.2
Timm50	-3.23599	2.597e-06	-2.35945	0.0004766	1.3715	0.204139	351.9	345.8	362.7	353.467	119	118.5	115	117.5	190.7	111.3	170.8	157.6
Rps23	-3.23286	8.867e-05	-3.28974	6.612e-05	-1.01759	0.963661	251.7	267.1	197.4	238.733	65.7	97.1	75	79.2667	88.4	51.1	88.7	76.0667
Slc25a4	-3.23096	9.536e-09	-2.20693	8.287e-05	1.46401	0.058852	1270.1	1188.9	1206.3	1221.77	389	478.3	351	406.1	742.1	439	567.8	582.967
Rbmx	-3.22389	2.756e-08	-2.68121	2.33e-06	1.2024	0.376911	1415.1	1438	1273.4	1375.5	445.6	586.9	345	459.167	620.5	480.1	504.8	535.133
Cct2	-3.21567	3.388e-08	-2.58527	6.11e-06	1.24384	0.294446	1248.1	1061.3	1080	1129.8	498.1	288.4	352	379.5	577.6	335.8	463.8	459.067
Fam92a	-3.20973	0.0003637	-2.43246	0.006094	1.31954	0.40258	162.9	153.5	140.3	152.233	68.9	45.7	39	51.2	95.4	38.1	66.8	66.7667
Hnrnpab	-3.19992	9.37e-08	-2.66893	5.58e-06	1.19896	0.398765	1279.8	1668.2	1496.8	1481.6	449.7	558.3	490	499.333	829.1	409.9	542	593.667
Rbmxl1	-3.17902	1.128e-05	-2.42154	0.0006499	1.31281	0.297922	334.8	360.8	294.6	330.067	112.4	124.2	99	111.867	204.5	99.2	131.7	145.133
Rnaseh2c	-3.15478	4.405e-05	-1.89019	0.0202878	1.66903	0.0677975	217.5	254.1	198.4	223.333	75.5	61.4	91	75.9667	150.6	104.2	117.4	124.067
Tsen34	-3.1331	2.379e-06	-1.83236	0.0105916	1.70987	0.0249308	599.6	770.3	612.1	660.667	205.2	234.2	242	227.133	569.3	286.7	302.5	386.167
Stip1	-3.13201	7.071e-06	-2.96989	1.658e-05	1.05459	0.842618	417.1	452.4	459.9	443.133	144.4	154.2	158	152.2	129.9	137.3	192.8	153.333
Smc6	-3.10396	1.761e-06	-2.04028	0.002201	1.52134	0.0746922	461.9	384.7	364.7	403.767	161.7	124.2	133	139.633	218.3	203.5	189.9	203.9
Rrs1	-3.10369	0.0003796	-1.79174	0.0610896	1.73222	0.0837769	186.6	269.1	292.5	249.4	100.1	80	82	87.3667	219.7	65.1	168	150.933
Eif2s1	-3.09902	3.71e-07	-2.14361	0.0004904	1.4457	0.0942238	774.7	792.3	857.6	808.2	269.2	291.3	281	280.5	511.3	259.6	427.5	399.467
Hnrnpd	-3.07316	2.913e-07	-1.94566	0.001986	1.57949	0.0345282	783.7	1094.2	1073	983.633	329.9	305.6	402	345.833	581.8	489.1	517.2	529.367
Ilf2	-3.0703	3.878e-06	-1.91757	0.006188	1.60114	0.0517244	357.6	439.5	404.8	400.633	130.5	152.8	139	140.767	239.1	198.5	216.6	218.067
Slc25a10	-3.06373	5.587e-08	-2.84822	3.516e-07	1.07566	0.721325	1761.3	1812.7	1895.6	1823.2	599.9	711.1	608	639.667	896.9	644.5	479.1	673.5
Plp2	-3.05533	6.454e-08	-1.69824	0.008993	1.79912	0.004011	1402	1085.2	1039.9	1175.7	461.2	351.3	424	412.167	952.1	678.5	537.3	722.633
Srsf7	-3.05523	2.963e-06	-3.6134	1.016e-07	-1.18269	0.486739	516.5	438.5	440.8	465.267	177.3	184.2	130	163.833	153.4	109.2	139.3	133.967
Snrpd3	-3.05326	0.005274	-2.06365	0.0670939	1.47954	0.339619	69.2	74.7	83.2	75.7	31.2	22.8	26	26.6667	63.6	15	41	39.8667
Cct7	-3.03004	2.738e-09	-2.36594	3.1e-06	1.28069	0.178546	1737.7	1528.7	1764.3	1676.9	593.3	566.9	621	593.733	916.2	614.4	697.6	742.733
Nop58	-3.01514	3.663e-05	-2.05905	0.006133	1.46433	0.150825	278.6	379.7	423.8	360.7	153.5	119.9	117	130.133	265.3	129.3	168.9	187.833
Slc29a1	-3.00841	9.546e-05	-2.20495	0.00464	1.36439	0.262464	1482.7	1369.3	1257.4	1369.8	603.2	375.5	496	491.567	1227.1	257.6	556.4	680.367
Rpl15	-2.99939	3.807e-08	-1.96034	0.0006132	1.53004	0.031416	1094.1	1223.8	1014.9	1110.93	375.9	428.4	391	398.433	679.9	529.2	566.9	592
Clns1a	-2.99432	1.53e-06	-2.44581	7.684e-05	1.22427	0.374347	594.7	625.8	699.3	639.933	219.1	232.7	238	229.933	375.9	205.5	251.9	277.767
Dek	-2.98556	1.821e-06	-2.42238	9.799e-05	1.23249	0.358667	798.4	1106.2	781.5	895.367	321.7	392.7	260	324.8	479.5	355.8	332.1	389.133
Pih1d1	-2.98024	1.215e-06	-2.13427	0.0006327	1.39637	0.133856	547.5	567	537	550.5	208.4	168.5	219	198.633	326.1	219.5	266.2	270.6
Sap30	-2.97512	0.0006247	-2.51082	0.003647	1.18492	0.613882	171.9	143.5	108.2	141.2	61.5	47.1	44	50.8667	76	40.1	61.1	59.0667
Hspe1	-2.95796	1.285e-07	-4.25095	4.188e-12	-1.43712	0.0749147	1256.2	1403.1	1375.6	1344.97	451.4	564	453	489.467	353.8	268.6	368.4	330.267
Cct4	-2.94987	1.227e-09	-2.19932	7.569e-06	1.34126	0.093798	2975.2	3001.6	3030.7	3002.5	1068.5	1145.2	1069	1094.23	1615.4	1182.7	1481.1	1426.4
Eif4a1	-2.93798	1.996e-07	-2.19383	0.0001273	1.3392	0.150925	5975.6	8104	6400	6826.53	2042.6	3115.7	2338	2498.77	4265.9	2808.4	2807.5	3293.93
Rfc3	-2.93078	0.003781	-2.46281	0.013821	1.19001	0.670157	82.3	60.8	75.1	72.7333	30.4	28.6	21	26.6667	47	25.1	21.9	31.3333
Tk1	-2.93014	8.973e-08	-1.99473	0.0004762	1.46894	0.0529243	906.7	836.1	849.6	864.133	324.2	307	319	316.733	461.6	416.9	464.7	447.733
Rpl29	-2.92265	2.08e-07	-2.21692	0.0001006	1.31834	0.174613	1509.6	1199.8	1222.3	1310.57	604	404.1	441	483.033	837.4	554.3	467.6	619.767
Psip1	-2.90858	4.866e-07	-3.00054	2.283e-07	-1.03161	0.886936	911.6	839.1	803.5	851.4	356.2	328.4	262	315.533	317.8	231.5	335.9	295.067
Hnrnpa3	-2.8965	3.902e-08	-2.74193	1.797e-07	1.05637	0.774294	1703.5	1693.1	1721.2	1705.93	706.6	561.2	638	635.267	787.7	651.5	507.7	648.967
Sfxn1	-2.89153	0.003217	-2.07748	0.0413913	1.39184	0.354511	303.1	291	298.6	297.567	174	45.7	116	111.9	291.6	72.2	107.8	157.2
Cct3	-2.88443	2.554e-08	-2.42954	2.6e-06	1.18723	0.362454	1543.8	1640.3	1485.8	1556.63	595.8	609.7	539	581.5	750.4	533.2	726.2	669.933
Ppil1	-2.88432	0.0002923	-2.79376	0.0004462	1.03241	0.92299	288.4	334.8	275.5	299.567	132.1	111.4	94	112.5	193.5	66.2	89.7	116.467
Naa50	-2.86734	1.877e-07	-1.81343	0.00277	1.58117	0.0219629	1063.1	1409.1	1175.2	1215.8	462.8	464.1	449	458.633	867.8	561.3	695.7	708.267
Exosc8	-2.86319	0.004601	-2.96298	0.003843	-1.03485	0.975736	97.8	90.7	64.1	84.2	34.5	25.7	34	31.4	38.7	15	36.3	30
Rpl9	-2.84196	8.951e-08	-2.03724	0.000231	1.395	0.0834212	2241.1	2307	2219.2	2255.77	1029.1	635.4	911	858.5	1376.4	1123.5	965.8	1155.23
Rps11	-2.8343	3.542e-06	-2.73271	7.556e-06	1.03717	0.868122	4098.6	2757.5	3040.7	3298.93	1783.3	835.3	1152	1256.87	1630.6	800.8	1370.4	1267.27
Phb	-2.8286	4.298e-05	-1.85603	0.0134237	1.52401	0.0944959	394.3	440.5	291.5	375.433	174.8	109.9	145	143.233	272.2	170.4	196.6	213.067
Dctpp1	-2.82413	0.0003649	-2.37193	0.00283	1.19065	0.552904	168.6	202.3	190.4	187.1	72.2	58.5	83	71.2333	92.6	68.2	86.8	82.5333
Syncrip	-2.82353	1.433e-07	-1.98331	0.0004427	1.42365	0.0694242	2041.6	2326	2046.8	2138.13	846.9	848.2	757	817.367	1585	976.2	866.5	1142.57
Sfpq	-2.8198	1.452e-08	-2.8313	1.284e-08	-1.00408	0.982798	3381.7	3614.5	3491.5	3495.9	1276.1	1333.7	1389	1332.93	1428.9	1312	1106	1282.3
Mbd3	-2.79985	3.733e-07	-2.53165	4.226e-06	1.10594	0.615028	1613	1648.3	1526.9	1596.07	697.5	538.3	610	615.267	914.8	434	662.3	670.367
G3bp1	-2.79797	9.361e-08	-2.11244	8.831e-05	1.32452	0.13874	3464.8	3686.2	3255.1	3468.7	1184.2	1510.7	1294	1329.63	2085.3	1221.8	1881.9	1729.67
Fkbp4	-2.79785	9.475e-05	-2.58869	0.0002939	1.0808	0.766698	809.8	872	699.3	793.7	290.5	294.1	329	304.533	568	169.4	263.4	333.6
Nhp2	-2.78743	0.001243	-2.64532	0.002215	1.05372	0.881155	185.7	213.3	168.3	189.1	75.5	72.8	71	73.1	124.4	41.1	66.8	77.4333
Actl6a	-2.759	2.29e-05	-2.56338	8.189e-05	1.07631	0.760709	490.4	476.4	450.8	472.533	211.7	201.3	142	185	257	141.3	186.1	194.8
Tpi1	-2.75336	1.392e-05	-1.15838	0.5203	2.37691	0.0001959	804.9	687.6	679.3	723.933	351.2	211.3	287	283.167	675.7	778.8	464.7	639.733
Ddx39	-2.74937	1.035e-05	-2.83267	5.94e-06	-1.0303	0.899565	620.8	586	622.2	609.667	259.3	234.2	223	238.833	252.9	151.3	272	225.4
Nudcd2	-2.74449	1.89e-05	-1.80835	0.0106632	1.51767	0.076475	396.7	389.7	484.9	423.767	197.8	154.2	149	167	251.5	238.5	237.6	242.533
Flna	-2.74264	1.239e-07	-1.95718	0.0003737	1.40132	0.0721437	8666.4	6290.2	6443.1	7133.23	3408.1	2251.8	2723	2794.3	5255.4	2721.2	3536.6	3837.73
Sarnp	-2.73377	0.006104	-2.04126	0.0505007	1.33925	0.428463	200.4	75.7	151.3	142.467	80.4	37.1	49	55.5	99.5	74.2	42.9	72.2
Dnajc9	-2.72444	9.945e-05	-2.50168	0.000355	1.08905	0.748701	349.5	439.5	342.6	377.2	149.4	138.5	160	149.3	217	145.3	116.4	159.567
Srsf2	-2.72415	2.807e-06	-2.0772	0.0005619	1.31145	0.197882	4020.4	5111.3	3854.2	4328.63	1649.5	2039	1455	1714.5	2622.8	2402.4	1497.3	2174.17
Nono	-2.7151	5.104e-08	-2.25322	8.273e-06	1.20499	0.302364	2439.9	2349.9	2155	2314.93	1040.6	798.2	918	918.933	1397.1	912.1	930.4	1079.87
Cct8	-2.70587	2.772e-07	-2.06667	0.0001549	1.30929	0.161352	1038.7	963.7	916.7	973.033	418.5	377	365	386.833	588.7	423	463.8	491.833
Ssrp1	-2.70337	8.029e-06	-2.51333	3.331e-05	1.07561	0.744454	1256.2	1001.5	867.6	1041.77	414.4	474.1	348	412.167	642.6	302.7	373.1	439.467
Tpm2	-2.69963	6.41e-06	-2.39298	6.958e-05	1.12815	0.578933	1587.8	1002.5	1403.6	1331.3	596.6	434.1	552	527.567	851.3	489.1	417	585.8
Fxn	-2.67266	0.0114591	-1.77281	0.135054	1.50758	0.300505	44.8	54.8	59.1	52.9	20.5	21.4	22	21.3	48.4	22.1	25.8	32.1
Magoh	-2.66522	1.624e-05	-1.76276	0.0111332	1.51196	0.0677583	527.1	608.9	543	559.667	197	262.7	218	225.9	370.3	289.7	335	331.667
Srsf10	-2.6602	1.299e-06	-2.05476	0.000324	1.29465	0.198142	990.6	1148	993.9	1044.17	446.4	446.9	379	424.1	686.8	463.1	457.1	535.667
Tomm40	-2.64619	6.334e-06	-2.29837	0.000103	1.15133	0.51398	782.9	815.2	760.4	786.167	295.4	328.4	333	318.933	454.6	255.6	373.1	361.1
Paics	-2.64324	0.0002843	-1.80146	0.026025	1.46728	0.153796	301.4	244.2	216.4	254	110	102.8	96	102.933	215.6	116.3	115.5	149.133
Rpl18	-2.64265	2.236e-06	-2.30718	4.361e-05	1.1454	0.503208	2118.1	1698.1	1926.6	1914.27	837.1	574	918	776.367	1029.5	605.4	971.5	868.8
Nudt21	-2.63043	0.0003279	-1.5695	0.0870098	1.67597	0.0534142	302.2	448.4	327.6	359.4	117.4	168.5	156	147.3	302.6	239.5	181.3	241.133
Lsm4	-2.63	5.462e-06	-2.7507	2.002e-06	-1.04589	0.831683	936.9	890.9	886.7	904.833	334	451.2	322	369.067	432.5	284.6	318.7	345.267
Rbm3	-2.62364	5.244e-06	-2.10291	0.0004078	1.24762	0.291839	1047.7	1001.5	1116.1	1055.1	426.7	371.3	497	431.667	624.6	547.2	394.1	521.967
Pgam1	-2.61298	1.54e-06	1.12848	0.537089	2.94869	7.11e-08	1437.1	1080.3	1202.3	1239.9	592.5	421.2	514	509.233	1712.2	1527.5	1097.4	1445.7
Hsp90aa1	-2.61025	1.268e-07	-6.03311	0	-2.31131	3.901e-06	7665.2	6683.9	6554.3	6967.8	2869.8	2530.2	3177	2859	1120.7	1089.5	1351.3	1187.17
Cbx1	-2.60772	2.915e-05	-2.01502	0.002046	1.29414	0.255589	1499	2044.9	1470.8	1671.57	652.4	865.3	560	692.567	1116.6	902	597.4	872
Pfn1	-2.60394	9.694e-08	-2.10697	2.887e-05	1.23587	0.230791	7348.3	7595.7	7709.4	7551.13	3307.2	2937.2	3136	3126.8	3707.6	3024.9	4438.4	3723.63
Rps16	-2.60206	1.449e-06	-1.90854	0.0009905	1.36338	0.115947	1077.8	1100.2	1042	1073.33	428.4	451.2	450	443.2	610.8	483.1	660.4	584.767
Caprin1	-2.58296	1.927e-07	-1.78529	0.001295	1.4468	0.0402941	3283.9	3111.2	2616.9	3004	1351.6	1343.7	1059	1251.43	2186.2	1356.1	1755.9	1766.07
Lgals1	-2.56928	0.0109671	-1.69984	0.147152	1.51148	0.264522	217.5	113.6	140.3	157.133	80.4	41.4	73	64.9333	48.4	133.3	89.7	90.4667
Dpy30	-2.56293	8.923e-05	-2.04352	0.002669	1.25418	0.346317	365	322.9	338.6	342.167	142	145.6	142	143.2	222.5	136.3	168.9	175.9
Gpx4	-2.56204	1.442e-07	-2.05263	5.083e-05	1.24817	0.209878	3110.4	3086.3	3050.7	3082.47	1206.3	1350.8	1315	1290.7	1731.5	1288.9	1678.6	1566.33
Galnt18	-2.55936	1.367e-07	-2.42299	6.634e-07	1.05628	0.756128	4839.1	4091.8	4137.8	4356.23	1837.4	1857.7	1775	1823.37	2466.7	1692.8	1489.7	1883.07
Ptma	-2.55602	4.142e-06	-2.69262	1.237e-06	-1.05344	0.795418	19678.2	17244.3	14167.5	17030	8743.1	6684	6127	7184.7	10087.9	5354.1	4678.9	6706.97
Rsl1d1	-2.54204	0.0003528	-2.07374	0.004908	1.22582	0.442028	224	283	249.5	252.167	119	104.2	99	107.4	131.3	117.3	130.7	126.433
Spr	-2.54146	3.536e-05	-2.22021	0.0003677	1.14469	0.549201	645.2	773.3	821.5	746.667	282.3	344.1	323	316.467	400.8	365.8	285.3	350.633
Ptges3	-2.52482	1.216e-05	-1.86827	0.002879	1.35142	0.149181	6848.9	10028.3	6971.1	7949.43	2680.2	4289.4	3190	3386.53	5222.2	4058.2	4136.9	4472.43
Hint1	-2.51762	2.14e-06	-2.19112	5.223e-05	1.14901	0.474945	1020.8	890.9	912.7	941.467	453.8	385.5	368	402.433	476.8	399.9	458.1	444.933
Fkbp3	-2.51169	0.0226248	-1.96115	0.0929985	1.28073	0.563836	75.8	75.7	76.1	75.8667	32.8	40	25	32.6	37.3	60.1	20	39.1333
Tpm4	-2.50283	5.239e-06	-1.42002	0.077004	1.76254	0.004577	1779.2	1772.9	1789.4	1780.5	649.1	799.6	835	761.233	1404	1437.3	1043	1294.77
Tubg1	-2.48607	0.0005313	-2.17928	0.002933	1.14077	0.616792	522.2	593.9	558	558.033	265.9	234.2	228	242.7	465.7	150.3	219.5	278.5
H1f0	-2.47505	2.174e-07	-1.32797	0.0992743	1.86379	0.0003387	2122.2	1815.7	2043.8	1993.9	932.2	825.3	840	865.833	1784	1376.1	1525.9	1562
Cacybp	-2.46886	2.301e-05	-2.07821	0.0005536	1.18797	0.420646	669.7	723.5	639.2	677.467	335.6	305.6	249	296.733	382.8	284.6	354	340.467
U2af1	-2.44848	0.0005599	-1.9822	0.007943	1.23523	0.415288	279.4	265.1	271.5	272	144.4	95.7	119	119.7	196.2	125.3	112.6	144.7
Bzw2	-2.44666	0.001591	-2.24678	0.004329	1.08896	0.760863	220.8	192.3	206.4	206.5	123.1	62.8	87	90.9667	106.4	78.2	102.1	95.5667
Tuba1a	-2.42038	1.261e-05	-2.95777	1.059e-07	-1.22203	0.315568	9716.5	8875.3	9180.2	9257.33	4406.8	3475.5	4456	4112.77	2611.8	3910.9	2992.7	3171.8
Sf3b3	-2.41932	2.426e-05	-2.28012	8.037e-05	1.06105	0.776176	1458.3	1134.1	1091	1227.8	623.7	518.3	492	544.667	838.8	399.9	474.3	571
Ddx18	-2.41421	0.002982	-1.63745	0.0923412	1.47437	0.194854	169.5	156.5	185.3	170.433	56.6	74.3	95	75.3	117.5	95.2	111.7	108.133
Phb2	-2.39577	3.703e-05	-1.35868	0.141996	1.7633	0.007048	1299.4	1536.7	1419.7	1418.6	544.9	659.7	703	635.867	1597.5	849.9	894.2	1113.87
Srsf6	-2.38493	7.66e-06	-1.95615	0.0005061	1.2192	0.305833	1146.2	1065.3	1034.9	1082.13	500.6	529.8	433	487.8	733.8	496.1	510.5	580.133
Dnajc2	-2.3846	0.001497	-1.64508	0.0656791	1.44954	0.173911	242	272.1	221.4	245.167	128.8	101.4	103	111.067	149.2	188.4	120.2	152.6
Tardbp	-2.37529	1.055e-05	-2.12669	0.0001161	1.1169	0.572759	966.2	963.7	896.7	942.2	508	408.4	370	428.8	540.3	402.9	444.7	462.633
Snrpc	-2.36187	3.974e-05	-1.8005	0.004598	1.31179	0.192665	771.5	805.2	686.3	754.333	395.5	342.7	297	345.067	527.9	426	357.9	437.267
Rnps1	-2.36033	4.685e-05	-1.64063	0.0176849	1.43868	0.0825911	682.7	775.3	640.2	699.4	352.9	287	320	319.967	577.6	374.9	396	449.5
Pcbp2	-2.34367	7.986e-06	-1.59869	0.0129652	1.466	0.0431257	2029.3	1526.7	1667.1	1741.03	933.1	666.8	793	797.633	1451	818.9	1157.6	1142.5
Ppid	-2.33887	0.0005178	-2.44786	0.0002605	-1.0466	0.858284	368.2	319.9	291.5	326.533	171.5	142.8	136	150.1	170	102.2	147	139.733
Cdv3	-2.33521	0.0001434	-1.68828	0.0176917	1.38319	0.143598	907.5	1170	911.7	996.4	437.4	452.6	490	460	494.7	647.5	671.8	604.667
Cyc1	-2.32036	1.369e-05	-2.02773	0.0002439	1.14431	0.483966	1536.5	1636.3	1567.9	1580.23	673.7	741.1	779	731.267	1086.2	638.4	748.2	824.267
Mrpl18	-2.32007	0.0003716	-1.69563	0.0237839	1.36826	0.184569	392.7	382.7	457.9	411.1	183.8	165.6	221	190.133	259.8	245.6	247.2	250.867
Hspa9	-2.31925	1.05e-05	-1.54456	0.0212097	1.50156	0.0321829	1365.4	1380.2	1334.5	1360.03	620.4	689.7	582	630.7	1184.3	697.6	904.7	928.867
Eef1d	-2.31679	6.311e-05	-2.09504	0.0004188	1.10584	0.630202	1008.6	794.3	743.4	848.767	449.7	292.7	435	392.467	474	368.8	416.1	419.633
Ifrd2	-2.31267	5.517e-05	-2.36352	3.57e-05	-1.02199	0.919308	697.4	777.3	733.4	736.033	359.4	351.3	320	343.567	380	265.6	334	326.533
Tra2b	-2.30298	1.616e-05	-3.25346	1.876e-09	-1.41272	0.0742194	1491.7	1291.5	1325.5	1369.57	675.4	592.6	647	638.333	527.9	440	344.5	437.467
Uchl3	-2.30188	0.006127	-1.77387	0.0579061	1.29766	0.393133	138.5	153.5	145.3	145.767	64.8	64.3	75	68.0333	125.8	60.1	77.3	87.7333
Hdgf	-2.30008	3.623e-06	-2.08021	4.386e-05	1.1057	0.574428	1847.7	1922.3	1927.6	1899.2	941.3	849.6	880	890.3	1062.7	794.8	1003	953.5
Eny2	-2.29368	0.0333048	-1.53501	0.273338	1.49424	0.321516	68.4	57.8	47.1	57.7667	36.9	24.3	20	27.0667	53.9	20	45.8	39.9
Rpa3	-2.28889	0.0421501	-2.52806	0.0235332	-1.10449	0.834521	60.3	48.8	57.1	55.4	37.7	21.4	19	26.0333	40.1	12	19.1	23.7333
Ddx39b	-2.27913	2.487e-06	-2.44592	3.421e-07	-1.07318	0.684736	3971.5	3639.4	3290.2	3633.7	1893.2	1599.2	1653	1715.13	1977.5	1361.1	1329.3	1555.97
Tuba1c	-2.27404	7.938e-05	-2.05464	0.000523	1.10678	0.622644	3539.7	2053.9	2606.9	2733.5	1414	1058.1	1371	1281.03	1789.6	879	1510.7	1393.1
Rbm17	-2.27309	0.00252	-2.04609	0.008273	1.11094	0.702394	194.7	213.3	267.5	225.167	132.1	85.7	104	107.267	129.9	104.2	110.7	114.933
Ssb	-2.27207	0.0002707	-1.91288	0.003814	1.18778	0.443206	593.1	486.3	496.9	525.433	320.1	237	192	249.7	359.3	236.5	266.2	287.333
Nudt5	-2.27171	0.0002597	-1.73708	0.0132068	1.30778	0.233309	513.2	496.3	449.8	486.433	225.7	225.6	238	229.767	375.9	215.5	293.9	295.1
Hat1	-2.27004	0.0106678	-2.03008	0.0270936	1.11821	0.755162	96.9	104.6	94.2	98.5667	43.5	48.5	48	46.6667	62.2	41.1	49.6	50.9667
Hnrnpu	-2.26766	3.888e-06	-1.93506	0.0001836	1.17189	0.365622	9030.6	9971.5	8299.5	9100.53	4383.1	4849.1	3741	4324.4	6166	4049.2	4631.2	4948.8
Upf3b	-2.26184	0.001808	-2.72951	0.0001421	-1.20676	0.480019	281.1	304.9	247.5	277.833	154.3	145.6	99	132.967	120.2	85.2	113.6	106.333
Pbdc1	-2.25798	0.004495	-2.48043	0.001546	-1.09852	0.752569	206.1	252.1	214.4	224.2	105.9	119.9	96	107.267	100.9	62.1	121.2	94.7333
Thoc7	-2.25719	0.009526	-1.57317	0.143648	1.43481	0.255055	96.9	106.6	122.2	108.567	61.5	40	54	51.8333	82.9	62.1	71.6	72.2
Pfdn6	-2.24829	0.0215723	-1.63937	0.15695	1.37144	0.389597	59.5	87.7	76.1	74.4333	32.8	30	44	35.6	56.7	39.1	47.7	47.8333
Tcf3	-2.24682	1.135e-05	-1.67672	0.004712	1.34001	0.110238	1597.6	1482.9	1521.9	1534.13	731.2	679.7	787	732.633	1129	751.7	992.5	957.733
Siva1	-2.24154	0.0364741	1.10138	0.797196	2.4688	0.0188167	93.7	74.7	80.2	82.8667	50.1	45.7	24	39.9333	178.3	65.1	53.4	98.9333
Eif4e	-2.22902	0.001349	-1.60283	0.0569641	1.39068	0.187112	337.3	283	305.6	308.633	198.6	115.7	134	149.433	233.5	150.3	219.5	201.1
Ube2e3	-2.22718	0.0001638	-2.06674	0.0006136	1.07763	0.726913	812.2	860	788.5	820.233	465.3	384.1	346	398.467	370.3	368.8	487.6	408.9
Smarca5	-2.20393	7.906e-05	-1.6373	0.0129823	1.34608	0.136027	1031.4	1165	974.8	1057.07	593.3	554	411	519.433	751.8	556.3	716.7	674.933
Sfrp1	-2.16252	0.0181981	-2.50038	0.005212	-1.15623	0.653532	2369.9	1989.1	2066.9	2141.97	996.3	1570.7	614	1060.33	503	1536.5	483.8	841.1
Glrx3	-2.16024	0.004304	-1.77275	0.0330719	1.21858	0.467212	277	271.1	302.6	283.567	143.6	132.8	147	141.133	257	95.2	163.2	171.8
Eif4h	-2.15799	1.563e-05	-1.49745	0.0221626	1.44111	0.0386221	4200.4	4242.3	3829.2	4090.63	2143.5	2026.2	1953	2040.9	3645.5	2712.2	2227.3	2861.67
Nsmce4a	-2.1484	0.005099	-1.68305	0.0555403	1.27649	0.373466	211.8	193.3	198.4	201.167	123.9	94.2	85	101.033	175.5	104.2	99.2	126.3
Cfl2	-2.14821	0.0007754	-1.85507	0.006488	1.15802	0.517384	593.9	506.2	547	549.033	325.8	225.6	274	275.133	410.4	293.7	226.2	310.1
Cnih4	-2.14607	0.0116241	-1.71723	0.0711866	1.24973	0.469464	137.7	154.5	158.3	150.167	64.8	67.1	93	74.9667	94	73.2	105.9	91.0333
Supt16	-2.14022	0.0006658	-2.0597	0.00123	1.03909	0.864992	769.9	755.4	679.3	734.867	452.2	357	305	371.4	547.2	253.6	339.7	380.167
Mrpl12	-2.13954	0.001062	-1.71083	0.0197576	1.25059	0.333786	391.9	511.2	427.8	443.633	229.8	227	216	224.267	353.8	216.5	253.8	274.7
Dazap1	-2.12565	4.963e-05	-1.64936	0.006675	1.28877	0.170283	1656.2	1656.3	1650.1	1654.2	758.3	938.1	808	834.8	1238.2	944.1	961	1047.77
Ywhah	-2.11783	0.00311	-1.33043	0.25489	1.59184	0.0662288	717.7	681.6	688.3	695.867	345.5	362.7	350	352.733	317.8	551.3	713.8	527.633
Cnbp	-2.1105	5.239e-05	-1.79525	0.001461	1.1756	0.379216	1457.4	1268.6	1314.5	1346.83	727.9	658.3	670	685.4	1007.4	619.4	737.7	788.167
Anp32a	-2.10426	0.0210923	-1.07277	0.829685	1.96151	0.0367553	100.2	136.5	138.3	125	72.2	60	61	64.4	129.9	152.3	79.2	120.467
Tagln2	-2.08678	0.00204	-1.63901	0.0371957	1.27319	0.308365	1210.6	1237.7	1074	1174.1	662.3	571.2	586	606.5	742.1	1005.3	444.7	730.7
Nedd4	-2.06006	0.0001518	-1.44009	0.0539712	1.43051	0.0587834	6413.9	5799.9	5033.4	5749.07	3033.9	3345.6	2599	2992.83	6009.9	2892.6	3807.7	4236.73
Ptov1	-2.05472	0.0001511	-1.43349	0.0560293	1.43336	0.057015	1580.5	1418.1	1537.9	1512.17	805.1	815.3	751	790.467	1551.9	870	926.6	1116.17
Ewsr1	-2.04672	7.027e-05	-1.64888	0.005266	1.24127	0.227467	2099.4	2179.5	1899.6	2059.5	1221.9	1032.4	1005	1086.43	1582.3	1224.8	1108.9	1305.33
Hnrnpf	-2.04244	0.0001695	-1.83313	0.001366	1.11418	0.569018	1308.4	1554.6	1372.6	1411.87	720.5	783.9	731	745.133	972.9	725.6	726.2	808.233
Prpf19	-2.03309	0.0004359	-1.43046	0.0735197	1.42129	0.0801467	1338.5	1235.7	1223.3	1265.83	728.7	616.9	664	669.867	1012.9	609.4	1154.7	925.667
2810004N23Rik	-2.01444	0.009958	-2.01889	0.0101939	-1.00221	1	382.1	278	227.4	295.833	235.5	119.9	120	158.467	189.3	116.3	152.7	152.767
Srsf4	-2.01339	0.001341	-1.91507	0.002912	1.05134	0.81828	937.7	766.3	713.3	805.767	511.3	379.8	400	430.367	655	346.8	335	445.6
Serbp1	-2.01111	0.0001049	-1.88135	0.0004412	1.06897	0.709729	2788.6	2927.9	2762.2	2826.23	1622.4	1472.2	1453	1515.87	2118.5	1325	1316	1586.5
Uqcc2	-2.00747	0.003235	-1.92345	0.005703	1.04369	0.862755	444	431.5	458.9	444.8	257.7	191.3	266	238.333	279.1	166.4	282.5	242.667
