# Supplementary material for: Integrative analysis of scRNA-seq and scATAC-seq revealed transit-amplifying thymic epithelial cells expressing autoimmune regulator
Source: eLife. 2022 May 17;11:e73998. doi: 10.7554/eLife.73998 (PMC9113748; doi:10.7554/eLife.73998)
Supplement: Supplementary file 8. [file elife-73998-supp8.xlsx]

## Sheet: 10x_RamDa_active.ident
Supplementary File 8. Summary for assignment of individual single cells in scRamDa-seq of mCherryhi, mCherrylo, and mCherryhi-RTOC
mCherryhi			mCherrylo			mCherryhi-RTOC
cell	cluster		cell	cluster		cell	cluster
mChi_mChi.011	R0		mClo_mClo.006	R0		RTOC.007	R0
mChi_mChi.014	R0		mClo_mClo.026	R0		RTOC.008	R0
mChi_mChi.020	R0		mClo_mClo.039	R0		RTOC.010	R0
mChi_mChi.025	R0		mClo_mClo.002	R01		RTOC.013	R0
mChi_mChi.032	R0		mClo_mClo.005	R01		RTOC.014	R0
mChi_mChi.039	R0		mClo_mClo.007	R01		RTOC.020	R0
mChi_mChi.042	R0		mClo_mClo.009	R01		RTOC.029	R0
mChi_mChi.028	R01		mClo_mClo.011	R01		RTOC.031	R0
mChi_mChi.001	R03		mClo_mClo.013	R01		RTOC.046	R0
mChi_mChi.007	R03		mClo_mClo.019	R01		RTOC.050	R0
mChi_mChi.015	R03		mClo_mClo.020	R01		RTOC.051	R0
mChi_mChi.016	R03		mClo_mClo.022	R01		RTOC.055	R0
mChi_mChi.022	R03		mClo_mClo.025	R01		RTOC.063	R0
mChi_mChi.024	R03		mClo_mClo.027	R01		RTOC.068	R0
mChi_mChi.029	R03		mClo_mClo.030	R01		RTOC.086	R0
mChi_mChi.030	R03		mClo_mClo.033	R01		RTOC.088	R0
mChi_mChi.036	R03		mClo_mClo.034	R01		RTOC.089	R0
mChi_mChi.021	R05		mClo_mClo.035	R01		RTOC.092	R0
mChi_mChi.026	R05		mClo_mClo.041	R01		RTOC.005	R01
mChi_mChi.035	R05		mClo_mClo.042	R01		RTOC.024	R01
mChi_mChi.038	R05		mClo_mClo.029	R02		RTOC.040	R01
mChi_mChi.045	R06		mClo_mClo.032	R02		RTOC.054	R01
mChi_mChi.027	R07		mClo_mClo.001	R04		RTOC.052	R02
mChi_mChi.033	R07		mClo_mClo.014	R07		RTOC.083	R02
mChi_mChi.041	R07		mClo_mClo.003	R09		RTOC.002	R03
mChi_mChi.012	R09		mClo_mClo.008	R09		RTOC.009	R03
mChi_mChi.005	R10+R15		mClo_mClo.015	R09		RTOC.027	R03
mChi_mChi.006	R10+R15		mClo_mClo.018	R09		RTOC.034	R03
mChi_mChi.019	R10+R15		mClo_mClo.023	R09		RTOC.047	R03
mChi_mChi.037	R10+R15		mClo_mClo.028	R09		RTOC.064	R03
mChi_mChi.044	R10+R15		mClo_mClo.031	R09		RTOC.067	R03
mChi_mChi.009	R13		mClo_mClo.036	R09		RTOC.076	R03
mChi_mChi.018	R13		mClo_mClo.043	R09		RTOC.077	R03
mChi_mChi.046	R14		mClo_mClo.046	R09		RTOC.084	R03
mChi_mChi.043	R16		mClo_mClo.047	R09		RTOC.091	R03
			mClo_mClo.010	R14		RTOC.093	R03
						RTOC.095	R03
						RTOC.096	R04
						RTOC.017	R05
						RTOC.021	R05
						RTOC.049	R05
						RTOC.057	R05
						RTOC.065	R05
						RTOC.015	R06
						RTOC.041	R06
						RTOC.071	R06
						RTOC.003	R07
						RTOC.011	R07
						RTOC.026	R07
						RTOC.030	R07
						RTOC.032	R07
						RTOC.037	R07
						RTOC.039	R07
						RTOC.045	R07
						RTOC.066	R08
						RTOC.012	R09
						RTOC.036	R09
						RTOC.075	R09
						RTOC.060	R10+R15
						RTOC.062	R10+R15
						RTOC.072	R10+R15
						RTOC.078	R10+R15
						RTOC.080	R10+R15
						RTOC.019	R13
						RTOC.033	R17

## Sheet: Assignment
Supplementary Table 5. Summary for assignment of individual single cells in scRamDa-seq of mCherryhi, mCherrylo, and mCherryhi-RTOC
	Number					Ratio
	Cluster in 10x scRNA	mCherrylo	mCherryhi	nCherryhi-RTOC		Cluster in 10x scRNA	mCherrylo	mCherryhi	mCherryhi-RTOC
	R0	3	7	18		R0	0.0833333	0.2	0.276923
	R1	17	1	4		R1	0.472222	0.0285714	0.0615385
	R2	2	0	2		R2	0.0555556	0	0.0307692
	R3	0	9	13		R3	0	0.257143	0.2
	R4	1	0	1		R4	0.0277778	0	0.0153846
	R5	0	4	5		R5	0	0.114286	0.0769231
	R6	0	1	3		R6	0	0.0285714	0.0461538
	R7	1	3	8		R7	0.0277778	0.0857143	0.123077
	R8	0	0	1		R8	0	0	0.0153846
	R9	11	1	3		R9	0.305556	0.0285714	0.0461538
	R10+R15	0	5	5		R10+R15	0	0.142857	0.0769231
	R11	0	0	0		R11	0	0	0
	R12	0	0	0		R12	0	0	0
	R13	0	2	1		R13	0	0.0571429	0.0153846
	R14	1	1	0		R14	0.0277778	0.0285714	0
	R16	0	1	0		R16	0	0.0285714	0
	R17	0	0	1		R17	0	0	0.0153846
	Sum	36	35	65		Sum	1	1	1
